# Supplementary material for: TP53 Mutations Promote Immunogenic Activity in Breast Cancer
Source: J Oncol. 2019 Jun 2;2019:5952836. doi: 10.1155/2019/5952836 (PMC6582869; doi:10.1155/2019/5952836)
Supplement: Supplementary Materials — Supplementary Tables. Table S1: the list of 26 immune signatures and related gene sets. Table S2: sample sizes of breast cancers. Table S3: ssGSEA scores of immune signature in TCGA and METABRIC. Table S4: primer sequences used for real time quantity PCR. Table S5: comparison of the enrichment levels of 15 immune cell types and function signatures between two classes of samples. Table S6: comparison of the enrichment levels of the tumor-infiltrating lymphocytes signature between two classes of samples. Table S7: comparison of the enrichment levels of the cytokine and cytokine receptor signature between two classes of samples. Table S8: comparison of the enrichment levels of the inflammation-promoting and parainflammation (PI) signatures between two classes of samples. Table S9: comparison of the enrichment levels of the HLA signature between two classes of samples. Table S10: comparisons of the ssGSEA scores of immune signatures between TP53-mutated and TP53-wildtype BCs and their associations with survival prognosis in BC. Table S11: comparisons of the expression levels of immune genes between TP53-mutated and TP53-wildtype BCs and their associations with survival prognosis in BC. Table S12: comparisons of the expression levels of genes and their protein products between TP53-mutated and TP53-wildtyped BCs. Table S13: comparisons of the enrichment levels of immune signatures between TP53-mutated and TP53-wildtype BCs within the ER+ subtype of BC. Table S14: comparisons of the enrichment levels of immune signatures between TP53-mutated and TP53-wildtype BCs within the HER2- subtype of BC. Table S15: comparisons of the enrichment levels of immune signatures between TP53-mutated and TP53-wildtype BCs within the 100% tumor purity of BC. Table S16: comparisons of the enrichment levels of the cancer-testis signature between two classes of samples. Table S17: comparisons of the enrichment levels of the Treg signature between two classes of samples. Table S18: comparisons [file 5952836.f1.zip › 5952836.f1/Supplementary Tables 1-9.xlsx]

## Sheet: Table S1
Table S1. The list of 26 immune signatures and related gene sets.
Immune signatures
B cells	CD4+ Regulatory T cells	CD8+ T cells	Macrophages	Neutrophils	NK cells	pDCs	MHC Class I	APC Co-stimulation	T cell Co-stimulation	APC Co-inhibition	T cell Co-inhibition	Type I IFN Reponse	Type II IFN Reponse	Cytolytic Activity	HLA	CT	Immune cell infiltrate	Treg	Immune checkpoint	TILs genes	CCR genes	Metastasis-promoting genes	Metastasis inhibiting genes	Inflammation-promoting genes	PI
BACH2	C15orf53	CD8A	C11orf45	EVI2B	KLRC1	CLEC4C	B2M	CD40	CD2	C10orf54	BTLA	DDX4	GPR146	PRF1	HLA-E	CEP55	FOXP3	IL12RB2	IDO1	ITM2C	CCL16	C17orf62	IRF7	CCL5	CXCL10
BANK1	CTLA4		CD68	HSD17B11	KLRF1	CXCR3	HLA-A	CD58	CD226	CD274	C10orf54	IFIT1	SELP	GZMA	HLA-DPB2	NUF2	B3GAT1	TMPRSS6	LAG3	CD38	TPO	BACH2	DPH6	CD19	PLAT
BLK	FOXP3		CLEC5A	KDM6B		GZMB	TAP1	CD70	CD27	LGALS9	CD160	IFIT2	AHR		HLA-C	KIF2C	IL3RA	CTSC	CTLA4	THEMIS2	TGFBR2	SPNS2	IRF1	CD8B	CCND1
BTLA	GPR15		CYBB	MEGF9		IL3RA		ICOSLG	CD28	PDCD1LG2	CD244	IFIT3			HLA-J	OIP5	ENG	LAPTM4B	TNFRSF9	GLYR1	CXCL2	FBXO7	ABHD17A	CXCL10	LGMN
CD79A	IL32		FUCA1	MNDA		IRF7		SLAMF1	CD40LG	PVRL3	CD274	IRF7			HLA-DQB1	PBK	PDPN	TFRC	ICOS	ICOS	CCL14	GRSF1	PIK3CG	CXCL13	PLAUR
CD79B	IL4		GPNMB	NLRP12		IRF8		TNFSF14	ICOS		CTLA4	ISG20			HLA-DQB2	TTK	CD1A	RNF145	CD80	F5	TGFBR3	LRIG1	RNF10	CXCL9	AIM2
FCRL1	IL5		HS3ST2	PADI4		LILRA4		TNFSF15	SLAMF1		HAVCR2	MX1			HLA-DQA2	FANCA	CXCR5	NETO2	PDCD1LG2	TIGIT	IL11RA	ARHGEF1	SLC9A3R2	GNLY	MMP7
FCRL3			LGMN	SELL		PHEX		TNFSF18	TNFRSF18		LAG3	MX2			HLA-DQA1	CASC5	CD247	ADAT2	TIGIT	KLRD1	CCL11	NBEAL2		GZMB	ICAM1
HVCN1			MMP9	TRANK1		PLD4		TNFSF4	TNFRSF25		LAIR1	RSAD2			HLA-A	ATAD2	IL17A	CHST2	CD70	IRF4	IL4I1	CYBA		IFNG	MX2
RALGPS2			TM4SF19	VNN3		PTCRA		TNFSF8	TNFRSF4		TIGIT	TNFSF10			HLA-DMA	CCDC36	TPSAB1	CTLA4	TNFSF9	PRKCQ	IL33	HSP90AA1		IL12A	CXCL9
								TNFSF9	TNFRSF8						HLA-DOB	PLAC1	CSF2	NFE2L3	ICOSLG	FCRL5	CXCL12	TBC1D22A		IL12B	ANXA1
									TNFRSF9						HLA-DRB1	ODF2	CD68	LIMA1	KIR3DL1	SIRPG	CXCL10	CYBB		IRF1	TLR2
									TNFSF14						HLA-H	PIWIL2	PTPRC	IL1R2	CD86	LPXN	BMPER	FAM175B		PRF1	PLA2G2D
															HLA-B	KDM5B	CD8A	ICOS	PDCD1	IL2RG	BMP8A	NCF2		STAT1	ITGA2
															HLA-DRB5	ACTL8	MS4A1	HSDL2	LAIR1	CCL5	CXCL11	ENTPD1		TBX21	MX1
															HLA-DOA	RGS22		HTATIP2	TNFRSF8	LCK	IL21R				HMOX1
															HLA-DPB1	SYCE1		FKBP1A	TNFSF15	TRAF3IP3	IL17B				CD276
															HLA-DRA	KIF20B		TIGIT	TNFRSF14	CD86	TNFRSF9				TIRAP
															HLA-DRB6	TDRD6		CCR8	IDO2	MAL	ILF2				IL33
															HLA-L	SPAG4		LTA	CD276	LILRB1	CX3CR1				PTGES
															HLA-F	PRAME		SLC35F2	CD40	DOK2	CCR8				TNFRSF12A
															HLA-G	SPAG1		IL21R	TNFRSF4	CD6	TNFSF12				SCARB1
															HLA-DMB	TMEFF2		AHCYL1	TNFSF14	PAG1	CSF3				CD14
															HLA-DPA1	TSGA10		SOCS2	HHLA2	LAX1	TNFSF4				BLNK
																GPATCH2		ETV7	CD244	PLEK	BMP3				IFIT3
																PRSS50		BCL2L1	CD274	PIK3CD	CX3CL1				RETNLB
																SPAG8		RRAGB	HAVCR2	SLAMF1	BMP5				IFIT2
																TPPP2		ACSL4	CD27	XCL1	CXCR2				ISG15
																ARMC3		CHRNA6	BTLA	GPR171	TNFRSF10D				OAS2
																TULP2		BATF	LGALS9	XCL2	BMP2				REL
																SPAG6		LAX1	TMIGD2	TBX21	CXCL14				OAS3
																DMRT1		ADPRH	CD28	CD2	CCL28				CD44
																GPAT2		TNFRSF4	CD48	CD53	CXCL3				PPARG
																TMEFF1		ANKRD10	TNFRSF25	KLHL6	BMP6				BST2
																RQCD1		CD274	CD40LG	SLAMF6	CCL21				OAS1
																SPEF2		CASP1	ADORA2A	CD40	CXCL9				NOX1
																DCAF12		LY75	VTCN1	SIT1	CCL23				PLA2G2A
																CSAG1		NPTN	CD160	TNFRSF4	IL6				IFIT1
																ZNF165		SSTR3	CD44	CD79A	TNFRSF18				IFITM3
																DDX43		GRSF1	TNFSF18	CD247	IL17RD				IL1RN
																HORMAD1		CSF2RB	TNFRSF18	LCP2	IL17D
																TAF7L		TMEM184C	BTNL2	CD3D	IL27
																TEKT5		NDFIP2	C10orf54	CD27	CCL7
																COX6B2		ZBTB38	CD200R1	SH2D1A	IL1R1
																AKAP3		ERI1	TNFSF4	FYB	CXCR4
																MAGEA6		TRAF3	CD200	ARHGAP30	CXCR2P1
																CEP290		NAB1	NRP1	ACAP1	TGFB1I1
																MAGEA3		HS3ST3B1		CST7	IFNGR1
																CT83		LAYN		CD3G	IL9R
																CSAG2		JAK1		IL2RB	IL1RAPL1
																SPAG9		VDR		CD3E	IL11
																MAGEA12		LEPROT		FCRL3	CSF1
																CALR3		GCNT1		CORO1A	IL20RA
																SPANXN3		PTPRJ		ITK	IL25
																CTCFL		IKZF2		TCL1A	TNFRSF4
																ROPN1		CSF1		CYBB	IL18
																SPAG17		ENTPD1		CSF2RB	ILF3
																MAGEA2		TNFRSF18		IKZF1	CCL20
																MAGEA1		METTL7A		NCF4	TNFRSF12A
																DKKL1		KSR1		DOCK2	IL6ST
																CABYR		SSH1		CCR2	CXCL13
																HORMAD2		CADM1		PTPRC	IL12B
																MAGEA4		IL1R1		PLAC8	TNFRSF8
																LUZP4		ACP5		NCKAP1L	IL6R
																DSCR8		CHST7		IL7R	BMPR2
																MAGEC1		THADA		2019-09-06	IFNE
																TSSK6		CD177		CD28	IL1RAPL2
																MAGEC2		NFAT5		STAT4	IL3RA
																LDHC		ZNF282		CD8A	BMP4
																PRSS55		MAGEH1		LY9	CCL24
																CAGE1				CD48	TNFSF13B
																RBM46				HCST	CCR4
																PIWIL1				PTPRCAP	IL2RA
																CCDC62				SASH3	IL32
																XAGE3				ARHGAP25	TNFRSF10C
																MAGEA11				LAT	IL22RA1
																POTEE				TRAT1	BMPR1A
																MAEL				IL10RA	CXCR5
																ADAM29				PAX5	CXCR3
																MAGEB1				CCR7	IFNA8
																SPANXB2				DOCK11	IL17REL
																BAGE2				PARVG	IFNB1
																MAGEA9B				SPNS1	IFNAR1
																TEX15				CD52	TNFRSF1B
																PAGE2B				HCLS1	CCL17
																MAGEA10				ARHGAP9	IFNL1
																MAGEB6				GIMAP6	IL16
																ACRBP				PRKCB	IL1RL1
																SSX2				MS4A1	ILK
																CT45A1				GPR18	CCL25
																SSX1				TBC1D10C	ILDR2
																CT45A5				GVINP1	CXCR1
																MAGEC3				P2RY8	IL36RN
																MAGEA5				EVI2B	IL34
																TEX101				VAMP5	TGFB1
																PAGE2				KLRK1	IFNG
																POTEG				SELL	IL19
																GAGE4				MPEG1	ILKAP
																FTHL17				MS4A6A	BMP2K
																CTAGE5				ARHGAP15	CCR10
																SLCO6A1				MFNG	ILDR1
																FATE1				GZMK	EPO
																PAGE5				SELPLG	CCR7
																CCDC83				TARP	IL17C
																KIAA0100				GIMAP7	IL23A
																FMR1NB				FAM65B	CCR5
																CTAG1B				INPP5D	IL7
																XAGE2				ITGA4	EPOR
																CT55				MZB1	CCL13
																CCDC110				GPSM3	IL2RG
																CT45A3				STK10	IL31RA
																GAGE12D				CLEC2D	TNFAIP6
																POTEC				IL16	IFNL2
																DPPA2				NLRC3	BMP1
																CCDC33				GIMAP5	IL12RB1
																PRSS54				GIMAP4	TNFAIP8
																RNF17				IFFO1	IL4R
																IGSF11				CFH	TNFRSF6B
																DDX53				PVRIG	TNFAIP8L1
																HEMGN				CFHR1	TNFRSF10B
																PTPN20A					IFNL3
																PASD1					CCL5
																GAGE12J					CXCL6
																CTAG2					CXCL1
																AKAP4					CCR3
																CT45A2					TNFSF11
																MAGEB3					CSF1R
																SPANXC					IL21
																GAGE2A					IL1RAP
																BAGE					IL12RB2
																SPA17					CCL1
																ANKRD45					IL17RA
																CT45A4					CCR1
																SSX4					IL1RN
																NXF2					TNFRSF11B
																LEMD1					TNFRSF14
																LYPD6B					IL13
																ZNF645					IL2RB
																ODF4					BMP8B
																SSX3					CCL2
																SPANXE					IL24
																CT45A6					IL18RAP
																ANKRD30BP2					TGFBI
																PAGE1					TNFSF10
																SPACA3					TNFRSF11A
																GAGE1					CXCL5
																DNAJB8					IL5RA
																GAGE8					TNFSF9
																FAM133A					IL1RL2
																SSX7					TNFRSF13C
																FBXO39					IL36G
																CPXCR1					IL15RA
																EPPIN					TNFRSF21
																LOC339010					CXCL8
																TFDP3					IL22RA2
																TEX14					TNFAIP8L2
																SPANXA2					IL18R1
																FAM46D					IFNLR1
																CT47B1					CXCR6
																HSPB9					CCL3L3
																IMP3					TNFRSF1A
																SSX9					IL17RE
																GAGE13					IFNGR2
																SPANXN5					IL17RC
																TMPRSS12					TNFAIP8L3
																SEMG1					ILVBL
																SSX6					TGFBRAP1
																TMEM108					CCL4L1
																SPATA19					CSF2RA
																VENTXP1					CCRN4L
																ODF3					CCL26
																SPANXN1					TNFAIP1
																SAGE1					CCRL2
																MAGEB2					IFNA10
																REC114					TNFRSF17
																POTEH					IFNA13
																CTNNA2					IL20
																IL13RA2					IL18BP
																NR6A1					CCL3L1
																NLRP4					TNFSF12-TNFSF13
																MAGEA8					IL5
																ELOVL4					IL23R
																PAGE3					IL26
																SPO11					TNF
																SPANXN2					TGFA
																CT47A1					CSF2
																ARX					IL1F10
																PRM2					CXCL17
																CTAGE1					TNFSF13
																GAGE12F					IFNA4
																SYCP1					IL37
																MORC1					IL12A
																NXF2B					IL7R
																XAGE5					IFNA1
																PRM1					IL1A
																XAGE1D					IL4
																CT47A11					IL2
																CT47A2					CCL22
																CT47A6					CSF3R
																CT47A7					IL10
																OTOA					IFNK
																THEG					TGFB2
																MAGEB4					IL1R2
																NOL4					IL1B
																LY6K					IL17F
																TDRD1					IL27RA
																ADAM2					IL15
																LIPI					TNFSF8
																BRDT					IL36B
																ODF1					XCL1
																POTEA					CXCL16
																POTED					TNFRSF19
																PAGE4					IL3
																TPTE					CCL3
																CCNA1					IFNA2
																CRISP2					BMPR1B
																SSX5					IFNA21
																CT47A10					TNFSF18
																CT47A9					CCL8
																SPANXN4					IL17RB
																TSPY1					TNFRSF25
																TSPY2					IL22
																TSPY3					IL10RB
																					IFNAR2
																					CCL18
																					IFNA16
																					CSF2RB
																					IL36A
																					TNFAIP3
																					IL13RA2
																					IL13RA1
																					CCR9
																					TNFRSF10A
																					IFNA7
																					IFNW1
																					XCL2
																					TNFSF14
																					CCR2
																					BMP15
																					BMP10
																					CCL15-CCL14
																					TGFBR1
																					IFNA5
																					BMP7
																					IFNA14
																					IL20RB
																					IL10RA
																					IFNA17
																					CCR6
																					TGFB3
																					CCL15
																					CCL4
																					CCL27
																					TNFRSF13B
																					TNFAIP2
																					IL31
																					IL17A
																					TNFSF15
																					CCL19
																					IFNA6
																					IL9

## Sheet: Table S2
Table S2. Sample sizes of breast cancers
Sample	Sample size（TCGA）	Sample size（METABRIC）
TP53-mutated BCs	302	664
TP53-wildtype BCs	677	1202
ER+/TP53-mutated BCs	137	308
ER+/TP53-wildtype BCs	579	1123
HER2-/TP53-mutated BCs	159	503
HER2-/TP53-wildtype BCs	348	1133

## Sheet: Table S3
Table S3. ssGSEA scores of immune signature in TCGA and METABRIC.
TP53-mutated BCs in TCGA
sample	TCGA-A1-A0SI-01A-11R-A144-07	TCGA-A1-A0SK-01A-12R-A084-07	TCGA-A1-A0SP-01A-11R-A084-07	TCGA-A2-A04P-01A-31R-A034-07	TCGA-A2-A04T-01A-21R-A034-07	TCGA-A2-A04U-01A-11R-A115-07	TCGA-A2-A04W-01A-31R-A115-07	TCGA-A2-A0CM-01A-31R-A034-07	TCGA-A2-A0CW-01A-21R-A115-07	TCGA-A2-A0D0-01A-11R-A00Z-07	TCGA-A2-A0D1-01A-11R-A034-07	TCGA-A2-A0EQ-01A-11R-A034-07	TCGA-A2-A0EY-01A-11R-A034-07	TCGA-A2-A0SV-01A-11R-A084-07	TCGA-A2-A0SW-01A-11R-A084-07	TCGA-A2-A0SX-01A-12R-A084-07	TCGA-A2-A0T1-01A-21R-A084-07	TCGA-A2-A0T2-01A-11R-A084-07	TCGA-A2-A0YE-01A-11R-A109-07	TCGA-A2-A0YG-01A-21R-A109-07	TCGA-A2-A0YH-01A-11R-A109-07	TCGA-A2-A0YJ-01A-11R-A109-07	TCGA-A2-A0YM-01A-11R-A109-07	TCGA-A2-A0YT-01A-11R-A109-07	TCGA-A2-A1G1-01A-21R-A13Q-07	TCGA-A2-A3XS-01A-11R-A22U-07	TCGA-A2-A3XT-01A-11R-A22U-07	TCGA-A2-A3XV-01A-21R-A239-07	TCGA-A2-A3XX-01A-21R-A239-07	TCGA-A2-A3XY-01A-11R-A239-07	TCGA-A2-A3Y0-01A-11R-A239-07	TCGA-A2-A4S1-01A-21R-A266-07	TCGA-A2-A4S3-01A-21R-A266-07	TCGA-A7-A0CE-01A-11R-A00Z-07	TCGA-A7-A0CJ-01A-21R-A00Z-07	TCGA-A7-A0DA-01A-31R-A115-07	TCGA-A7-A13D-01A-13R-A12P-07	TCGA-A7-A13E-01A-11R-A12P-07	TCGA-A7-A26F-01A-21R-A169-07	TCGA-A7-A26G-01A-21R-A169-07	TCGA-A7-A26I-01A-11R-A169-07	TCGA-A7-A2KD-01A-31R-A21T-07	TCGA-A7-A3RF-01A-11R-A22K-07	TCGA-A7-A4SA-01A-11R-A266-07	TCGA-A7-A4SD-01A-11R-A266-07	TCGA-A7-A4SE-01A-11R-A266-07	TCGA-A7-A56D-01A-11R-A27Q-07	TCGA-A7-A5ZV-01A-11R-A28M-07	TCGA-A8-A06O-01A-11R-A00Z-07
APC co-inhibition	0.15425	-0.321439	0.0956928	0.152586	0.0938241	-0.151457	0.0690245	0.228337	0.0633674	0.0505924	-0.181812	0.244712	-0.0367481	0.164293	0.188631	0.261327	0.322785	0.081154	-0.0646682	-0.0571474	0.254074	-0.135038	0.19967	-0.0416626	0.169879	0.00723429	0.146687	-0.0913722	-0.00780151	0.212533	0.104442	0.30946	-0.0185745	-0.00609467	0.0162415	-0.0587703	-0.0195574	-0.171272	0.232213	0.155028	0.0783662	0.0469733	-0.159677	0.181696	0.266327	0.204809	0.182395	0.102955	0.00914691
APC co-stimulation	-0.459152	-0.58105	-0.450466	-0.395877	-0.187962	-0.378393	-0.508493	-0.179994	-0.429828	-0.286717	-0.460796	-0.0532895	-0.510814	-0.233264	-0.294201	-0.184457	-0.183374	-0.261451	-0.544324	-0.463881	-0.247301	-0.456764	-0.198636	-0.503646	-0.20066	-0.425914	-0.314977	-0.556087	-0.391044	-0.347712	-0.417572	-0.316346	-0.340224	-0.601564	-0.491308	-0.283845	-0.446995	-0.435097	-0.402689	-0.199385	-0.319275	-0.387502	-0.616664	-0.436468	-0.364221	-0.434723	-0.370637	-0.428304	-0.444411
B cells	-0.113335	-0.261628	-0.147196	-0.0199704	-0.14131	-0.258845	-0.257517	-0.144848	-0.18067	-0.176229	-0.273446	0.132094	-0.137702	-0.19421	0.0165525	0.0409759	-0.0130657	-0.283575	-0.224118	-0.162069	-0.111223	-0.277	-0.160943	-0.203429	-0.0865341	-0.0988785	-0.181536	-0.292992	-0.0946794	-0.122991	-0.120476	-0.243092	-0.14373	-0.213489	-0.259085	-0.248315	-0.271074	-0.241209	-0.13574	-0.0561991	-0.252159	-0.142468	-0.346981	-0.116629	-0.123647	-0.216456	-0.147879	-0.299401	-0.156285
CCR	-0.195561	-0.751295	-0.238527	-0.229843	-0.220723	-0.517384	-0.358086	-0.0647217	-0.444891	-0.172969	-0.605048	-0.0671305	-0.375858	-0.30161	-0.222191	-0.0625367	-0.026843	-0.393143	-0.38684	-0.536116	-0.152786	-0.503128	-0.0985986	-0.456493	-0.0463465	-0.356259	-0.166183	-0.507415	-0.399109	-0.116785	-0.125762	-0.105527	-0.382134	-0.352641	-0.410917	-0.354294	-0.390269	-0.477373	-0.0186603	-0.158141	-0.392792	-0.284545	-0.628118	-0.231229	-0.120644	-0.260864	-0.247104	-0.416071	-0.491588
CD4+ Regulatory T cells	-0.29211	-0.679622	-0.251121	-0.210392	-0.195031	-0.415699	-0.466043	-0.0840338	-0.43163	-0.239482	-0.441888	-0.131229	-0.404757	-0.289464	-0.265828	-0.176947	-0.153216	-0.380733	-0.459645	-0.541907	-0.26111	-0.606641	-0.258938	-0.522485	-0.247797	-0.375335	-0.252667	-0.451314	-0.344449	-0.181997	-0.215218	-0.410621	-0.300434	-0.338347	-0.478593	-0.38233	-0.398062	-0.514918	-0.264037	-0.273191	-0.434134	-0.325621	-0.54106	-0.285088	-0.256762	-0.376705	-0.291539	-0.509577	-0.458387
CD8+ T cells	0.210196	-0.164478	-0.0781287	0.0104684	0.130826	-0.0636977	-0.116099	0.275905	-0.0125384	0.133073	-0.0482612	0.284008	-0.0041992	-0.111604	0.362077	0.254613	0.287674	0.0699669	-0.162527	-0.116276	0.0522238	-0.122368	-0.0249586	0.034599	0.140289	-0.0279749	0.000887154	-0.142004	-0.0298084	-0.0519872	0.14644	-0.0434114	0.0580199	-0.0953986	0.00502721	-0.164005	-0.219009	-0.0186894	-0.0570736	0.0711498	-0.193518	-0.0273243	-0.128992	0.261001	0.180151	-0.148805	-0.141885	0.0265555	-0.0607405
Immune checkpoint	-0.092196	-0.4797	-0.142458	0.0110663	0.00658457	-0.256746	-0.210365	0.101603	-0.206948	-0.00975662	-0.327135	0.194363	-0.228687	-0.00109351	0.0136933	0.107121	0.167195	-0.0854365	-0.303045	-0.266593	0.0806397	-0.305803	-0.0369526	-0.252049	0.0270171	-0.132361	0.053677	-0.275755	-0.126636	0.057986	-0.0181808	-0.0298561	-0.0718217	-0.25108	-0.206865	-0.194783	-0.231402	-0.257684	-0.0488698	-0.0247232	-0.187959	-0.131337	-0.398583	-0.0601496	0.0782737	-0.18679	-0.00694892	-0.0763137	-0.181874
CT	-1.46998	-1.27821	-1.34685	-1.3844	-1.34609	-1.33361	-1.50323	-1.37248	-1.40005	-1.36164	-1.45976	-1.4291	-1.34333	-1.34747	-1.38286	-1.4284	-1.52972	-1.30623	-1.26722	-1.39826	-1.33058	-1.21755	-1.32727	-1.39502	-1.26869	-1.41021	-1.35008	-1.48722	-1.31977	-1.48789	-1.16969	-1.25244	-1.14454	-1.44104	-1.37974	-1.38635	-1.29307	-1.39383	-1.38474	-1.45376	-1.20891	-1.35097	-1.46581	-1.5035	-1.1094	-1.41716	-1.39225	-1.379	-1.40872
Cytolytic activity	-0.0402753	-0.345537	-0.178305	-0.121956	0.051347	-0.225716	-0.166966	0.10658	-0.123509	0.132977	-0.173435	0.291975	-0.12584	-0.171611	0.107657	0.0533299	0.162518	-0.0664669	-0.184593	-0.203405	-0.0317618	-0.197316	-0.14793	-0.112019	-0.0317952	-0.140544	-0.0851932	-0.108444	-0.131362	-0.109194	0.128667	-0.060809	-0.0526365	-0.152514	-0.130156	-0.251458	-0.252882	-0.237815	-0.124068	-0.115459	-0.268942	-0.117444	-0.229734	-0.0335578	0.0297582	-0.218224	-0.102782	-0.244575	-0.183433
HLA	0.679688	0.0459185	0.674789	0.688425	0.691525	0.43694	0.51432	0.765928	0.659557	0.727152	0.320689	0.792967	0.659319	0.701608	0.766225	0.745244	0.840657	0.525431	0.397574	0.554169	0.76108	0.38141	0.688072	0.48397	0.677368	0.631479	0.798123	0.557129	0.664579	0.683401	0.789214	0.867831	0.709738	0.439044	0.374873	0.477559	0.238054	0.36975	0.542753	0.704086	0.483733	0.658897	0.46337	0.717711	0.842271	0.57705	0.724414	0.621058	0.597712
Immune cell infiltrate	0.13799	-0.297175	-0.0233853	0.0743478	-0.023574	-0.196657	-0.107995	0.105589	-0.12747	-0.0692999	-0.146554	0.256735	0.0416955	0.0375398	0.133524	0.191646	0.227776	-0.116588	-0.163373	-0.164912	0.0795858	-0.175694	0.0124508	-0.101124	0.0619242	0.0251979	0.00826283	-0.0275707	-0.028164	0.13379	0.0405844	-0.0388288	0.0128787	-0.184277	-0.137347	-0.142188	-0.230357	-0.202829	0.053849	0.088902	-0.109153	-0.0146943	-0.172305	0.0896257	0.0270853	-0.0899402	-0.00637731	-0.0969898	-0.0862252
Macrophages	0.615517	0.14856	0.60057	0.341908	0.544417	0.349935	0.525925	0.637509	0.395486	0.428294	0.367649	0.663821	0.520874	0.72365	0.648254	0.709905	0.743784	0.442072	0.343405	0.393946	0.704234	0.519037	0.681881	0.406808	0.644002	0.431154	0.739947	0.392546	0.526629	0.583704	0.413352	0.822738	0.536503	0.389099	0.486437	0.516432	0.422864	0.515196	0.670899	0.630769	0.618781	0.510495	0.361763	0.499014	0.579651	0.474835	0.614499	0.613244	0.568462
Metastasis-inhibiting	0.956867	0.152953	0.611336	0.742548	0.38597	0.516846	0.736596	0.818049	0.951086	0.668387	0.611308	0.785774	0.655206	0.958377	1.09093	0.745962	0.863891	0.794959	0.585249	0.549649	0.881911	0.435524	0.614789	0.750746	0.570565	0.716904	0.807201	0.927645	0.771969	0.884436	0.807942	0.906848	0.974297	0.487331	0.786207	0.608867	0.57541	0.408189	0.616584	0.602613	0.406092	0.790117	0.794109	0.841845	0.822603	0.800181	1.01284	0.594614	0.713665
Metastasis-promoting	1.44847	0.905923	1.46334	1.4437	1.46466	1.24679	1.4577	1.4667	1.32823	1.31426	1.11785	1.65748	1.4257	1.51006	1.48922	1.56029	1.79609	1.35173	1.30802	1.30226	1.53088	1.32891	1.48042	1.34626	1.43667	1.48182	1.51023	1.31983	1.53794	1.57488	1.47267	1.4608	1.48719	1.22978	1.1409	1.40849	1.3865	1.21003	1.32809	1.45678	1.29508	1.49699	1.26514	1.57807	1.58213	1.38745	1.39392	1.30145	1.43187
MHC Class I	2.4781	1.76336	2.36542	2.46711	2.32117	2.11808	2.26626	2.51481	2.47759	2.47635	2.21473	2.49672	2.26494	2.47936	2.49109	2.48807	2.49213	2.28228	2.35799	2.3313	2.47486	2.21587	2.44806	2.28055	2.48463	2.32959	2.48906	2.28823	2.41459	2.49524	2.50218	2.43118	2.47724	2.47351	2.44971	2.46266	2.35969	2.34491	2.41584	2.35527	2.39626	2.32295	2.35091	2.45447	2.51547	2.48982	2.47309	2.37341	2.32022
Neutrophils	0.230419	-0.138573	0.102733	0.120516	0.0485314	-0.174211	0.0691458	0.182534	0.0820751	-0.0969421	-0.0786159	0.430972	0.253385	0.122502	0.232754	0.337329	0.307384	-0.154363	-0.09381	0.0892264	0.349386	-0.200268	0.138236	-0.0217414	0.22572	-0.0222479	0.00311806	-0.0717619	-0.0636029	0.178742	0.048319	0.149795	0.108775	-0.18866	0.0318614	-0.0933732	-0.040877	-0.103005	0.301021	0.347205	0.0959669	0.154923	-0.0493777	0.251093	0.115035	-0.00603389	-0.0326734	0.0289082	0.0738833
NK cells	-0.631623	-0.988029	-0.766101	-0.737317	-0.704375	-0.97941	-0.639481	-0.590638	-0.73035	-0.788861	-0.895001	-0.404386	-0.699153	-0.722319	-0.624386	-0.725055	-0.523596	-0.719644	-0.785508	-0.871261	-0.649492	-0.929528	-0.7935	-0.699638	-0.547105	-0.772536	-0.801727	-0.505031	-0.813315	-0.734541	-0.612211	-0.447639	-0.654013	-0.718562	-0.787092	-0.742712	-1.02174	-0.837953	-0.676262	-0.751613	-0.707781	-0.713596	-0.928566	-0.748345	-0.727258	-0.910989	-0.860854	-1.08839	-0.740022
pDCs	-0.164977	-0.589361	-0.232048	-0.168647	-0.246371	-0.374328	-0.294844	-0.0970966	-0.131997	-0.281048	-0.249304	0.0508698	-0.287044	-0.17709	-0.063625	-0.0247392	-0.045341	-0.277347	-0.348804	-0.321515	-0.139432	-0.497003	-0.309206	-0.302184	-0.22428	-0.175513	-0.147433	-0.0418888	-0.155065	-0.043553	-0.173108	-0.0423361	-0.0461063	-0.372768	-0.250172	-0.361923	-0.396595	-0.439464	-0.217911	-0.179422	-0.416226	-0.210867	-0.36128	-0.0696077	-0.135459	-0.154222	-0.0864259	-0.396727	-0.212437
PI	0.841908	0.100299	0.599726	0.807216	0.585977	0.410402	0.513633	0.891222	0.792138	0.807621	0.341825	0.713945	0.444034	0.838717	0.771089	0.891374	0.84516	0.659365	0.685218	0.519416	0.907376	0.384286	0.848633	0.705644	0.83438	0.623228	0.790609	0.377503	0.603172	0.911514	0.769436	0.762306	0.650569	0.70949	0.674999	0.700628	0.739434	0.578006	0.916898	0.710424	0.740368	0.790915	0.510689	0.822227	0.895812	0.85244	0.800418	0.603441	0.66479
Pro-inflammation	0.220664	-0.243705	0.0251725	0.185136	0.302814	-0.202233	-0.110191	0.34272	0.0903676	0.295999	-0.137306	0.451828	-0.0114203	-0.022052	0.306623	0.278008	0.328353	0.0181142	-0.0589203	-0.0758425	0.162845	-0.19288	0.080851	-0.10286	0.235923	0.0259929	0.153205	-0.126178	0.091012	0.205052	0.366499	-0.0358314	0.148293	-0.0317396	-0.016661	-0.15619	-0.172652	-0.166741	0.0990484	0.09497	-0.222839	0.0889449	-0.235287	0.155614	0.32582	-0.0271171	0.0406988	-0.171666	-0.0661156
T cell co-inhibition	-0.117489	-0.481284	-0.139738	-0.0429622	-0.00139336	-0.309165	-0.274288	0.10861	-0.179752	-0.0190136	-0.279375	0.166488	-0.182645	-0.0403899	0.0197847	0.0498569	0.113849	-0.125609	-0.33135	-0.281758	0.110792	-0.363003	-0.10944	-0.230901	0.0332043	-0.178138	-0.020196	-0.242176	-0.163269	-0.019924	0.0347947	0.0447675	-0.13353	-0.24835	-0.180758	-0.294214	-0.371823	-0.298797	-0.0520943	-0.0270057	-0.15484	-0.108056	-0.369981	-0.028043	0.0757657	-0.189255	-0.0410806	-0.020049	-0.154019
T cell co-stimulation	-0.229229	-0.494438	-0.268629	-0.215065	-0.165513	-0.419464	-0.344837	-0.0993959	-0.291116	-0.186578	-0.412523	0.0190561	-0.288815	-0.287231	-0.080728	-0.058327	-0.00206615	-0.333956	-0.414217	-0.323746	-0.189271	-0.414163	-0.261254	-0.370395	-0.189861	-0.242927	-0.124229	-0.316605	-0.264725	-0.117608	-0.089219	-0.293975	-0.141738	-0.404302	-0.355133	-0.395397	-0.418465	-0.391061	-0.248292	-0.187018	-0.396039	-0.274472	-0.460224	-0.158431	-0.120117	-0.387724	-0.210753	-0.334647	-0.298236
TIL	0.0619434	-0.243177	0.0278522	0.100811	0.103573	-0.173805	-0.114918	0.197288	-0.0395167	-0.00281375	-0.125582	0.369303	0.0507794	0.00241505	0.246977	0.278576	0.301252	-0.0662694	-0.134335	-0.0891121	0.162678	-0.180915	0.0453298	-0.0539504	0.130378	0.0596593	0.112393	-0.0652277	0.0372213	0.151644	0.0997635	0.133196	0.0645262	-0.12441	-0.0975086	-0.155339	-0.213475	-0.150494	0.0823138	0.166968	-0.0982855	0.0365668	-0.199639	0.175712	0.11919	-0.0803913	-0.0080973	-0.0812657	-0.0199135
Treg	0.882523	0.73959	0.92117	0.827076	0.930064	0.672038	0.764767	0.997533	0.633604	0.867921	0.593537	0.995938	0.73864	0.812062	0.888742	1.03062	0.966976	0.686813	0.835768	0.802004	0.976487	0.841875	0.849292	0.70717	1.09376	0.743828	0.909488	0.42403	0.72936	0.869362	0.885099	0.981216	0.800611	0.80745	0.624738	0.873793	0.828579	0.628089	1.10118	1.10561	0.916901	0.854704	0.582719	0.895695	0.961323	0.823277	0.600701	0.760055	0.692883
Type I IFN Reponse	0.608542	-0.180821	0.115898	0.559103	0.262924	0.14928	0.21878	0.639675	0.637	0.46099	0.177209	0.41656	0.0927134	0.663332	0.446882	0.592086	0.464789	0.444412	0.411917	0.272045	0.701411	-0.0215788	0.574473	0.411036	0.410206	0.398663	0.362417	0.335327	0.330951	0.614851	0.38636	0.436822	0.378304	0.418879	0.657511	0.438173	0.435728	0.349248	0.61712	0.332611	0.507303	0.556295	0.336635	0.597514	0.608654	0.590006	0.720858	0.206055	0.514566
Type II IFN Reponse	0.149111	-0.224491	0.201049	0.147766	-0.0595074	-0.124217	0.203243	0.115689	-0.0125712	0.0368764	-0.156795	0.22933	0.168348	0.0339636	0.130127	0.249787	0.296222	0.156878	0.104114	0.201886	0.15598	0.109985	0.147359	0.190663	0.121789	0.0876278	0.0999161	-0.131807	-0.106934	0.162705	-0.0582496	0.207528	-0.0386848	0.0473926	-0.038659	-0.151285	0.0538327	0.214469	0.22643	0.29596	0.118879	0.135798	-0.111173	0.236509	0.121039	0.146823	-0.0494459	-0.0997331	0.0519382
TP53-wildtype BCs in TCGA
sample	TCGA-A1-A0SB-01A-11R-A144-07	TCGA-A1-A0SD-01A-11R-A115-07	TCGA-A1-A0SE-01A-11R-A084-07	TCGA-A1-A0SF-01A-11R-A144-07	TCGA-A1-A0SG-01A-11R-A144-07	TCGA-A1-A0SH-01A-11R-A084-07	TCGA-A1-A0SJ-01A-11R-A084-07	TCGA-A1-A0SM-01A-11R-A084-07	TCGA-A1-A0SN-01A-11R-A144-07	TCGA-A1-A0SQ-01A-21R-A144-07	TCGA-A2-A04N-01A-11R-A115-07	TCGA-A2-A04Q-01A-21R-A034-07	TCGA-A2-A04R-01A-41R-A109-07	TCGA-A2-A04V-01A-21R-A034-07	TCGA-A2-A04X-01A-21R-A034-07	TCGA-A2-A04Y-01A-21R-A034-07	TCGA-A2-A0CK-01A-11R-A22K-07	TCGA-A2-A0CL-01A-11R-A115-07	TCGA-A2-A0CO-01A-13R-A22K-07	TCGA-A2-A0CP-01A-11R-A034-07	TCGA-A2-A0CQ-01A-21R-A034-07	TCGA-A2-A0CR-01A-11R-A22K-07	TCGA-A2-A0CS-01A-11R-A115-07	TCGA-A2-A0CT-01A-31R-A056-07	TCGA-A2-A0CU-01A-12R-A034-07	TCGA-A2-A0CV-01A-31R-A115-07	TCGA-A2-A0CX-01A-21R-A00Z-07	TCGA-A2-A0CZ-01A-11R-A034-07	TCGA-A2-A0D2-01A-21R-A034-07	TCGA-A2-A0D3-01A-11R-A115-07	TCGA-A2-A0D4-01A-11R-A00Z-07	TCGA-A2-A0EM-01A-11R-A034-07	TCGA-A2-A0EN-01A-13R-A084-07	TCGA-A2-A0EO-01A-11R-A034-07	TCGA-A2-A0EP-01A-52R-A22U-07	TCGA-A2-A0ER-01A-21R-A034-07	TCGA-A2-A0ES-01A-11R-A115-07	TCGA-A2-A0ET-01A-31R-A034-07	TCGA-A2-A0EU-01A-22R-A056-07	TCGA-A2-A0EV-01A-11R-A034-07	TCGA-A2-A0EW-01A-21R-A115-07	TCGA-A2-A0EX-01A-21R-A034-07	TCGA-A2-A0ST-01A-12R-A084-07	TCGA-A2-A0SU-01A-11R-A084-07	TCGA-A2-A0SY-01A-31R-A084-07	TCGA-A2-A0T0-01A-22R-A084-07	TCGA-A2-A0T3-01A-21R-A115-07	TCGA-A2-A0T4-01A-31R-A084-07	TCGA-A2-A0T5-01A-21R-A084-07
APC co-inhibition	-0.221262	0.0696312	-0.0182874	0.0521008	0.00328337	-0.00202747	-0.037056	0.0614234	0.0608272	-0.0374149	-0.112715	0.387735	-0.168844	-0.0128049	0.186817	0.0676667	0.125475	0.371744	0.285312	0.0322613	0.05648	0.29005	0.0221154	-0.142535	-0.107885	0.0539846	0.163741	0.169322	0.0935249	-0.0408518	-0.121203	-0.00964794	0.222709	0.0961887	0.380557	-0.130376	0.131538	0.0271352	-0.0783897	0.166245	0.197305	-0.02464	0.44605	0.0226414	0.103428	0.107997	-0.200769	0.153981	-0.0905394
APC co-stimulation	-0.646529	-0.439895	-0.570578	-0.407019	-0.461925	-0.408508	-0.585393	-0.39579	-0.340165	-0.49272	-0.488252	-0.23902	-0.552374	-0.434933	-0.299085	-0.430012	-0.523294	-0.117675	-0.359158	-0.608746	-0.525537	-0.247766	-0.408591	-0.473629	-0.469687	-0.445927	-0.347426	-0.363888	-0.374863	-0.3986	-0.643693	-0.469138	-0.276249	-0.395294	-0.152549	-0.533805	-0.541608	-0.547676	-0.473415	-0.421756	-0.539828	-0.498799	-0.0822728	-0.552182	-0.335227	-0.296296	-0.53543	-0.507622	-0.495254
B cells	-0.226962	-0.177363	-0.152044	-0.102355	0.0420467	-0.176252	-0.136171	-0.173039	-0.164871	-0.167873	-0.117107	0.0595809	-0.220483	-0.208014	-0.0316248	-0.150828	-0.205432	0.195278	0.0498132	-0.173524	-0.231746	0.154325	-0.228095	-0.261496	-0.152996	-0.142871	-0.167626	-0.12348	-0.124517	-0.0698343	-0.23171	-0.182344	-0.0248542	-0.107369	0.142282	-0.155443	-0.157637	-0.214659	-0.218268	-0.122645	-0.0937891	-0.0741059	0.219069	-0.173666	0.0263174	-0.236831	-0.246501	-0.139463	-0.15039
CCR	-0.528174	-0.309854	-0.38952	-0.332148	-0.43779	-0.309061	-0.428896	-0.358695	-0.255296	-0.482888	-0.414791	0.0757906	-0.539935	-0.406353	-0.178445	-0.323192	-0.345252	0.0500967	-0.00895105	-0.337348	-0.406883	0.0460653	-0.40768	-0.544293	-0.466602	-0.216387	-0.29238	-0.188248	-0.229329	-0.368422	-0.543854	-0.405257	-0.0501123	-0.268433	0.172267	-0.451147	-0.21818	-0.428994	-0.469587	-0.314296	-0.265991	-0.341812	0.241595	-0.323693	-0.258743	-0.347993	-0.506695	-0.251227	-0.34654
CD4+ Regulatory T cells	-0.688168	-0.463244	-0.503551	-0.384002	-0.507147	-0.498333	-0.531476	-0.552792	-0.348117	-0.570559	-0.54255	-0.0829396	-0.611498	-0.341216	-0.223796	-0.339799	-0.416666	-0.0783457	-0.257862	-0.401759	-0.402433	-0.181521	-0.289291	-0.656223	-0.515243	-0.43687	-0.334308	-0.317621	-0.238354	-0.434419	-0.582082	-0.427636	-0.207766	-0.404387	-0.0868848	-0.453301	-0.539852	-0.488429	-0.528061	-0.29744	-0.505406	-0.458235	-0.0940433	-0.382105	-0.375957	-0.306844	-0.639786	-0.408029	-0.363996
CD8+ T cells	-0.188846	-0.115685	0.0320558	0.254909	-0.0636977	-0.131535	-0.0101136	-0.121895	0.198013	-0.106932	-0.0903714	0.465578	-0.107464	-0.110185	0.171694	0.167672	0.0196357	0.476402	0.188018	-0.0547078	-0.0942158	0.436598	-0.163	-0.14845	-0.100367	0.174178	-0.0466052	0.0865862	0.0925006	0.0983558	-0.160811	-0.123492	0.274604	0.0370239	0.22167	-0.0869411	0.0241897	0.0470192	-0.0762952	0.044476	0.0959309	-0.0534067	0.440324	0.0125384	0.0271469	-0.0953395	-0.0409865	0.0875325	-0.152295
Immune checkpoint	-0.413343	-0.173636	-0.266992	-0.0990055	-0.196477	-0.212637	-0.253932	-0.272631	-0.132373	-0.275855	-0.237584	0.294734	-0.341301	-0.17989	0.0784971	-0.0528968	-0.147878	0.324737	0.115493	-0.225388	-0.26774	0.252722	-0.179682	-0.295593	-0.343033	-0.117931	-0.0803601	-0.0709603	-0.0534614	-0.168337	-0.376155	-0.291428	0.0870528	-0.137613	0.268152	-0.285794	-0.194158	-0.282142	-0.22422	-0.12019	-0.187645	-0.19185	0.364699	-0.213703	-0.0516714	-0.131975	-0.354186	-0.0869616	-0.233504
CT	-1.48543	-1.52171	-1.46693	-1.52861	-1.56387	-1.52027	-1.4957	-1.48337	-1.43663	-1.41486	-1.55209	-1.43484	-1.43941	-1.47005	-1.43151	-1.47345	-1.52889	-1.49111	-1.61832	-1.59263	-1.44684	-1.62518	-1.51161	-1.48459	-1.49055	-1.5543	-1.39102	-1.62058	-1.18244	-1.49785	-1.30915	-1.54023	-1.49587	-1.57778	-1.66281	-1.44336	-1.60647	-1.34195	-1.42734	-1.29044	-1.63884	-1.57171	-1.36392	-1.49474	-1.5601	-1.12224	-1.4055	-1.49856	-1.52199
Cytolytic activity	-0.343116	-0.178531	-0.185857	0.00672456	-0.173107	-0.222775	-0.160178	-0.261149	-0.0670402	-0.180688	-0.239573	0.367455	-0.260371	-0.192661	0.0667554	-0.0863497	-0.0670086	0.169321	0.0137396	-0.184744	-0.208573	0.363817	-0.274351	-0.255341	-0.221236	-0.0836235	-0.100948	-0.0781587	0.0279794	-0.063869	-0.221805	-0.207274	0.0100838	-0.114065	0.158551	-0.199682	-0.144717	-0.126617	-0.190227	-0.0831041	-0.13349	-0.154225	0.355596	-0.126834	-0.0887973	-0.0489106	-0.236421	-0.0543113	-0.251042
HLA	0.353248	0.574801	0.449523	0.635043	0.598814	0.601896	0.487392	0.624034	0.71427	0.494033	0.612751	0.958928	0.220183	0.545191	0.812726	0.67469	0.682402	0.885161	0.74916	0.621775	0.741072	0.955578	0.759018	0.496046	0.450722	0.710438	0.678557	0.69087	0.666211	0.684622	0.250677	0.612961	0.842095	0.661076	0.858635	0.555214	0.626119	0.573127	0.399667	0.753556	0.65	0.618581	1.0133	0.630467	0.643147	0.593517	0.325077	0.692605	0.533398
Immune cell infiltrate	-0.286595	-0.061295	-0.0785254	0.0220668	0.0873883	-0.000462518	-0.0791438	-0.0824653	0.044763	-0.137366	0.0378353	0.33276	-0.188047	0.0525692	0.0987458	0.063226	-0.0802177	0.338797	0.234618	0.0104854	-0.108968	0.406743	0.0943141	-0.134254	-0.138895	0.00318721	0.0120626	0.142825	0.0584301	-0.0839597	-0.202325	-0.0640222	0.284766	0.0602864	0.418904	-0.088956	0.0249764	-0.101032	-0.0308108	0.0196278	0.0660848	0.0485014	0.416392	-0.0290728	0.114705	-0.108323	-0.2046	0.0790555	-0.13719
Macrophages	0.018663	0.45856	0.244821	0.359921	0.390629	0.579543	0.379144	0.499815	0.59123	0.420287	0.446033	0.673985	0.349669	0.541658	0.589822	0.530236	0.354907	0.590359	0.535388	0.369181	0.450434	0.615851	0.516647	0.3762	0.281519	0.398936	0.606311	0.61397	0.5229	0.271919	0.207893	0.436523	0.616206	0.552687	0.828277	0.397626	0.433673	0.341217	0.345744	0.676021	0.514067	0.445611	0.715863	0.40427	0.611457	0.513886	0.350066	0.638111	0.315155
Metastasis-inhibiting	0.326913	0.796914	0.599597	0.827454	0.758845	0.661218	0.634278	0.778038	0.856326	0.741877	0.810327	0.832593	0.734587	0.728026	1.04108	0.852957	0.876404	0.979243	1.06423	0.832321	0.812687	1.15295	0.884841	0.664953	0.5795	0.902636	0.79214	0.726065	0.564586	0.729661	0.814131	0.520678	0.881185	0.699236	1.00785	0.396416	0.599309	0.672573	0.790887	0.722481	0.69237	0.581645	0.997369	0.647543	0.865847	0.65783	0.618993	0.826979	0.67751
Metastasis-promoting	1.2279	1.30594	1.27437	1.33822	1.52869	1.36091	1.23861	1.60925	1.40918	1.34347	1.32756	1.62612	1.1384	1.29783	1.42237	1.44198	1.43855	1.69404	1.61572	1.36245	1.30172	1.73199	1.33955	1.16866	1.1915	1.33844	1.32597	1.49815	1.38976	1.29912	1.10574	1.24969	1.5543	1.37862	1.88972	1.227	1.36584	1.21014	1.16928	1.42934	1.42378	1.36031	1.80134	1.33005	1.45829	1.36349	1.23807	1.43583	1.32251
MHC Class I	1.76871	2.42376	2.08119	2.37775	2.22701	2.13105	2.28611	2.13537	2.39906	2.02341	2.16141	2.52204	2.07022	2.21517	2.52081	2.3873	2.37327	2.50785	2.45541	2.24706	2.24895	2.48524	2.32871	2.33287	1.99886	2.34915	2.42314	2.38497	2.39434	2.37061	2.27618	2.2246	2.45219	2.32248	2.44373	2.18667	2.25178	2.41118	2.31288	2.4545	2.23783	2.17467	2.52204	2.33406	2.28567	2.20859	2.1735	2.37605	2.17315
Neutrophils	-0.14601	0.199502	0.0542263	0.127763	0.163599	0.19196	0.172681	0.128082	0.213001	0.158853	0.13589	0.39132	0.0587325	0.0748598	0.305219	0.186467	0.128039	0.540264	0.377117	0.0739932	0.214474	0.328338	0.191233	0.0472556	0.0396539	0.261375	0.248021	0.226026	0.0265107	0.152844	0.0703727	0.127832	0.410929	0.193805	0.55194	0.0423955	0.236466	0.159236	0.101638	0.267584	0.257619	0.153255	0.516546	0.117753	0.299394	-0.140661	0.078044	0.268466	0.0819809
NK cells	-0.923743	-0.735478	-0.665069	-0.613192	-0.87333	-0.700308	-0.75107	-0.724475	-0.747249	-0.809658	-0.635916	-0.315086	-0.891467	-0.848187	-0.445196	-0.671297	-0.760161	-0.451284	-0.726115	-0.824735	-0.768168	-0.546867	-0.945591	-0.21617	-0.955412	-0.704102	-0.841869	-0.739571	-0.574167	-0.759735	-0.906613	-0.904604	-0.484652	-0.752188	-0.568236	-0.871039	-0.656555	-0.525341	-0.808032	-0.722671	-0.772048	-0.615686	-0.563593	-0.689046	-0.749436	-0.658804	-0.714681	-0.721706	-0.702955
pDCs	-0.576047	-0.237181	-0.36583	-0.289437	-0.213034	-0.263905	-0.37495	-0.228361	-0.173746	-0.292869	-0.298428	0.022001	-0.32386	-0.326162	-0.0323219	-0.221405	-0.242657	0.242851	0.0356599	-0.284388	-0.219453	0.33124	-0.25999	-0.296992	-0.417114	-0.159483	-0.249375	-0.262732	-0.150769	-0.304817	-0.379517	-0.395397	-0.0529103	-0.241463	0.224318	-0.389602	-0.286856	-0.269665	-0.30405	-0.243129	-0.229524	-0.267694	0.150716	-0.269905	-0.163252	-0.400524	-0.303661	-0.106255	-0.308563
PI	0.270598	0.813597	0.492854	0.515633	0.588548	0.486415	0.526265	0.565085	0.626765	0.373647	0.450163	0.888204	0.552794	0.612214	0.81099	0.819207	0.533835	0.96696	0.949628	0.628157	0.647554	0.830778	0.687002	0.406277	0.374335	0.690446	0.757682	0.720226	0.733823	0.486989	0.397737	0.499046	0.829007	0.669323	0.763342	0.580165	0.727308	0.590294	0.684896	0.767327	0.616561	0.444386	0.957976	0.506723	0.600719	0.508006	0.538898	0.833096	0.50956
Pro-inflammation	-0.368543	-0.0573305	-0.129282	0.126417	-0.0792834	-0.187593	-0.106301	-0.231212	0.0903903	-0.073974	-0.165826	0.554651	-0.231474	-0.13723	0.327476	0.103639	-0.0251147	0.417638	0.192099	-0.137179	-0.210769	0.457211	-0.176729	-0.141371	-0.210936	0.148295	0.12089	0.0678614	0.219798	0.104062	-0.196548	-0.212536	0.220763	0.0296027	0.297998	-0.182694	-0.0512412	0.00868237	-0.106517	0.0533889	0.00730455	-0.015138	0.503143	-0.0629584	0.0980813	0.059262	-0.0685201	0.0717756	-0.107811
T cell co-inhibition	-0.400746	-0.236044	-0.33993	-0.156279	-0.227814	-0.253926	-0.253874	-0.220415	-0.128437	-0.251348	-0.292416	0.298373	-0.363034	-0.219181	0.0278874	-0.0731278	-0.200653	0.284535	-0.00521762	-0.291084	-0.176861	0.196964	-0.24306	-0.341219	-0.286024	-0.175532	-0.0994424	-0.113637	-0.0433834	-0.219242	-0.347173	-0.265889	0.0672397	-0.170869	0.276518	-0.277637	-0.184441	-0.181887	-0.286317	-0.12046	-0.15047	-0.274204	0.314792	-0.221464	-0.122907	-0.152195	-0.357507	-0.0931167	-0.330645
T cell co-stimulation	-0.597994	-0.391085	-0.362633	-0.218885	-0.359454	-0.39596	-0.325487	-0.464987	-0.190843	-0.336044	-0.367944	0.0337816	-0.446584	-0.396924	-0.127465	-0.218212	-0.28591	0.0865058	-0.0624847	-0.383552	-0.393325	0.133284	-0.353942	-0.485249	-0.429009	-0.345515	-0.261258	-0.243783	-0.223896	-0.25304	-0.421165	-0.436095	-0.107535	-0.345526	0.11419	-0.379274	-0.38105	-0.311275	-0.38861	-0.296394	-0.37059	-0.336772	0.130823	-0.307769	-0.250557	-0.297061	-0.404332	-0.294778	-0.356544
TIL	-0.244284	-0.0491951	-0.0901114	0.0889717	0.0102771	-0.0479812	-0.0654806	-0.0816145	0.0926696	-0.0664574	-0.0777017	0.405702	-0.201531	-0.0889191	0.196942	0.0851235	-0.0202146	0.468401	0.254976	-0.0809099	-0.0898899	0.458605	-0.100844	-0.15336	-0.118362	0.0179049	0.012334	0.0897998	0.0817556	-0.0211523	-0.183348	-0.10963	0.250325	0.0178585	0.454701	-0.06947	-0.00360111	-0.0213683	-0.141222	0.0521873	0.0478918	0.000868386	0.488124	-0.00188545	0.125717	-0.0551163	-0.151383	0.0530638	-0.124443
Treg	0.786086	0.805349	0.734279	0.686707	0.760393	0.872091	0.838718	0.729958	0.829034	0.585246	0.78234	1.15109	0.517143	0.652701	0.782053	0.811213	0.60017	1.14716	0.90894	0.728867	0.670446	0.826033	0.730092	0.792428	0.669978	0.764737	0.894324	0.877359	0.86146	0.696437	0.640309	0.737226	1.05498	0.92755	1.10891	0.762241	0.909496	0.7352	0.810409	0.802071	0.81685	0.821035	1.26786	0.712953	0.742859	0.805434	0.60955	0.785852	0.775715
Type I IFN Reponse	0.010729	0.611554	0.161248	0.18479	0.260569	0.168299	0.185906	0.349441	0.268607	0.123606	0.141029	0.554646	0.295486	0.266178	0.737971	0.54025	0.209012	0.749616	0.596847	0.263323	0.309291	0.510587	0.448333	0.223507	0.0555242	0.293394	0.476092	0.291591	0.33972	0.0864994	0.213359	0.172221	0.404036	0.274712	0.247875	0.290719	0.428616	0.481281	0.39953	0.430398	0.332231	0.161331	0.699458	0.0691393	0.264957	0.181373	0.138677	0.54222	0.0723681
Type II IFN Reponse	0.119003	0.35659	0.28251	0.252458	0.169211	0.110294	0.299085	0.171785	0.271616	0.240035	0.22795	0.255738	-0.0198549	0.144188	0.2155	0.106693	0.232093	0.277765	0.535873	0.33203	0.184599	0.361931	0.13252	0.104468	0.236286	0.289055	0.0035454	0.24656	0.185563	0.18153	0.0176497	0.185567	0.416857	0.333083	0.562235	0.174671	0.319994	0.0655731	0.218662	0.15636	0.387259	0.323564	0.380115	0.359427	0.35367	0.026872	0.0181918	0.363121	0.191223
TP53-mutated BCs in METABRIC
sample	BRCA-METABRIC-S1-MB-0002	BRCA-METABRIC-S1-MB-0008	BRCA-METABRIC-S1-MB-0010	BRCA-METABRIC-S1-MB-0028	BRCA-METABRIC-S1-MB-0046	BRCA-METABRIC-S1-MB-0062	BRCA-METABRIC-S1-MB-0079	BRCA-METABRIC-S1-MB-0100	BRCA-METABRIC-S1-MB-0102	BRCA-METABRIC-S1-MB-0107	BRCA-METABRIC-S1-MB-0108	BRCA-METABRIC-S1-MB-0109	BRCA-METABRIC-S1-MB-0115	BRCA-METABRIC-S1-MB-0127	BRCA-METABRIC-S1-MB-0148	BRCA-METABRIC-S1-MB-0149	BRCA-METABRIC-S1-MB-0150	BRCA-METABRIC-S1-MB-0152	BRCA-METABRIC-S1-MB-0157	BRCA-METABRIC-S1-MB-0163	BRCA-METABRIC-S1-MB-0164	BRCA-METABRIC-S1-MB-0165	BRCA-METABRIC-S1-MB-0167	BRCA-METABRIC-S1-MB-0172	BRCA-METABRIC-S1-MB-0174	BRCA-METABRIC-S1-MB-0178	BRCA-METABRIC-S1-MB-0191	BRCA-METABRIC-S1-MB-0200	BRCA-METABRIC-S1-MB-0201	BRCA-METABRIC-S1-MB-0202	BRCA-METABRIC-S1-MB-0206	BRCA-METABRIC-S1-MB-0211	BRCA-METABRIC-S1-MB-0214	BRCA-METABRIC-S1-MB-0221	BRCA-METABRIC-S1-MB-0230	BRCA-METABRIC-S1-MB-0233	BRCA-METABRIC-S1-MB-0236	BRCA-METABRIC-S1-MB-0238	BRCA-METABRIC-S1-MB-0241	BRCA-METABRIC-S1-MB-0249	BRCA-METABRIC-S1-MB-0259	BRCA-METABRIC-S1-MB-0262	BRCA-METABRIC-S1-MB-0265	BRCA-METABRIC-S1-MB-0268	BRCA-METABRIC-S1-MB-0278	BRCA-METABRIC-S1-MB-0284	BRCA-METABRIC-S1-MB-0292	BRCA-METABRIC-S1-MB-0302	BRCA-METABRIC-S1-MB-0304
APC co-inhibition	-0.122957	0.0966543	0.0850861	-0.0986742	0.0771752	0.102373	-0.0288347	0.0753576	0.232672	-0.0718002	0.167848	-0.0322324	0.272889	0.0706075	0.189014	-0.196635	0.314464	0.111121	0.374524	0.263071	0.280469	0.176363	0.0962535	0.206512	0.202579	0.17434	0.262642	0.185212	0.0715271	0.0189438	0.461666	0.197863	0.0438125	0.125483	0.00652916	0.290033	0.0083715	0.230053	0.172441	0.0735569	0.00820393	0.290615	0.335008	-0.0639623	-0.125253	0.251306	0.149486	0.0321011	-0.0306234
APC co-stimulation	0.139633	0.112164	0.0495834	0.0451196	0.096021	0.0476986	0.167715	0.346135	0.232027	0.0785574	0.437328	0.102439	0.159235	0.269066	0.3725	0.0471287	0.42927	0.215796	0.443257	0.0896941	0.361474	0.216487	0.244619	0.217093	0.361497	0.260647	0.308684	0.206351	0.195713	0.176857	0.456481	0.113648	0.249801	0.129829	0.0494969	0.379111	0.26629	0.298711	0.310417	0.110831	0.0744043	0.336867	0.228698	0.203454	-0.0859062	0.250192	0.229818	0.164898	-0.0571356
B cells	-0.00959537	-0.0744016	-0.106342	-0.220752	-0.0973413	-0.019042	0.0589923	0.105343	0.137807	-0.185111	0.413568	0.0995263	0.192574	0.170921	0.271302	-0.175945	0.0765534	0.167284	0.110257	-0.01411	0.0452539	0.243514	-0.0851897	0.173733	-0.0288964	-0.132148	-0.00655342	-0.0284973	0.00243845	-0.0880738	0.212228	-0.130458	0.020851	0.143635	0.0350043	0.297901	0.194321	0.259742	-0.0108483	0.00623833	-0.148767	0.0340512	0.133617	-0.0790652	-0.0737651	0.113375	-0.0822174	0.297032	-0.356008
CCR	0.039461	0.271645	0.183253	0.0759981	0.218235	0.574295	0.353512	0.475443	0.343976	0.0742168	0.590777	0.298629	0.444132	0.475719	0.586356	0.22492	0.695125	0.500646	0.636248	0.204066	0.535027	0.424882	0.212125	0.422785	0.608127	0.258418	0.424389	0.303689	0.293982	0.276806	0.660313	0.313139	0.532942	0.302273	0.260461	0.544656	0.363762	0.534694	0.306573	0.43538	0.264521	0.415018	0.515687	0.187522	0.153976	0.517503	0.366119	0.470897	0.0409984
CD4+ Regulatory T cells	-0.131177	-0.233814	-0.397024	-0.119091	-0.219317	-0.00220663	-0.280416	-0.175145	-0.226576	-0.372643	-0.175769	-0.44298	-0.292113	-0.20699	-0.135013	-0.40397	0.0876116	-0.423672	-0.149143	-0.198607	-0.0651695	-0.139509	-0.211906	-0.385326	-0.315293	-0.363522	-0.0899968	-0.290386	-0.466323	-0.312561	-0.0098638	-0.336831	-0.13892	-0.412342	-0.397123	-0.119665	-0.287641	-0.119076	-0.422893	-0.490239	-0.163682	-0.2603	-0.220632	-0.326943	-0.410085	-0.295301	-0.501831	-0.237653	-0.386419
CD8+ T cells	0.108839	0.258687	0.183867	0.172423	0.11841	0.274042	0.347697	0.294432	0.354064	0.236965	0.443864	0.370209	0.296305	0.265345	0.375244	0.0851192	0.39164	0.273085	0.416941	0.125151	0.229225	0.364508	0.287524	0.328763	0.245995	0.207045	0.105593	0.287483	0.232179	0.13751	0.440369	0.231555	0.24329	0.280908	0.106092	0.383401	0.316903	0.394636	0.143128	0.213329	0.202717	0.351983	0.403416	0.15453	0.162062	0.397258	0.069556	0.279535	0.0371395
Immune checkpoint	-0.0270683	0.17827	0.145603	0.129519	0.0456963	0.268436	0.223244	0.339299	0.32434	0.0795135	0.5959	0.312308	0.396788	0.227463	0.448252	0.0215194	0.619026	0.292982	0.598608	0.15928	0.359558	0.364236	0.221023	0.362921	0.418677	0.264845	0.375935	0.262192	0.172237	0.147006	0.67432	0.259453	0.357732	0.186333	0.118345	0.483788	0.267607	0.559998	0.306877	0.175902	0.190714	0.454212	0.512635	0.0624483	0.0516256	0.409909	0.136214	0.24728	0.0796237
CT	-0.710655	-0.447441	-0.607485	-0.58982	-0.585897	-0.414363	-0.498404	-0.465444	-0.699901	-0.331264	-0.359913	-0.206475	-0.442925	-0.499214	-0.700521	-0.18115	-0.543963	-0.565237	-0.423361	-0.302822	-0.694353	-0.670688	-0.612401	-0.663539	-0.655811	-0.491556	-0.330373	-0.521056	-0.66535	-0.627236	-0.552254	-0.621807	-0.617659	-0.566849	-0.467828	-0.693864	-0.671638	-0.583687	-0.692645	-0.667598	-0.49883	-0.670385	-0.686899	-0.692078	-0.638257	-0.488794	-0.612367	-0.695841	-0.528863
Cytolytic activity	-0.0777602	0.195066	0.116825	0.016042	-0.0332539	0.19915	0.165516	0.1986	0.248978	0.0287554	0.388333	0.290562	0.248835	0.144861	0.316413	-0.0297344	0.430826	0.200654	0.357085	-0.00996579	0.122236	0.297682	0.0955221	0.262322	0.278629	0.221824	0.16639	0.187526	0.130204	0.132672	0.410937	0.184839	0.150504	0.241064	0.1814	0.304859	0.232567	0.322227	0.132686	0.169175	0.0674724	0.234024	0.38116	0.0840809	0.0973451	0.311277	-0.00736232	0.197534	0.0684964
HLA	0.637563	0.95607	0.944028	0.866066	0.816562	1.1792	1.04038	0.995326	0.901768	0.697061	1.05639	1.17756	1.19431	0.815171	1.201	0.824969	1.24857	1.02268	1.18331	0.958328	1.11744	1.07277	1.10249	0.971381	1.01318	0.948536	1.17745	0.893579	0.903998	0.937648	1.22659	0.929497	0.955057	1.00802	0.854115	1.17504	1.0757	1.10383	0.985578	1.04221	0.676716	1.21864	1.08132	0.906335	0.678189	0.93772	1.00704	1.00161	0.8441
Immune cell infiltrate	-0.00255396	0.12436	-0.112178	0.0391997	0.0971451	0.0259886	0.0534718	0.236844	0.120803	0.018499	0.364689	0.00850052	0.208766	0.207041	0.380725	-0.0558152	0.428206	0.2074	0.321886	0.11614	0.0937716	0.359119	0.10662	0.22684	0.273282	0.0298164	0.264392	0.112366	0.0684788	0.0287325	0.446461	0.272141	0.139166	0.243882	0.0581578	0.421559	0.110593	0.398381	0.109558	0.265041	0.162905	0.274667	0.398999	0.0575769	0.00917832	0.269946	0.0111031	0.363905	-0.128391
Macrophages	0.577466	0.913276	0.949055	0.738619	0.759964	0.893948	0.756334	0.818719	0.767076	0.617313	0.81387	0.823734	0.850288	0.84486	0.920146	0.834911	0.94309	0.940416	0.998227	0.857146	1.03097	0.881464	0.90255	0.854479	1.07626	0.922449	0.86674	0.816402	0.922823	0.960277	1.03395	1.03419	0.852866	0.880033	0.875895	1.05632	0.867302	0.869388	1.06215	1.01665	0.782224	1.01124	0.894297	0.859012	0.638331	0.921271	0.961917	0.808274	0.527373
Metastasis-inhibiting	1.05411	1.56774	1.42153	1.0283	1.28413	0.883868	1.16181	1.10345	1.44192	1.04941	1.13259	1.04555	1.40799	1.05633	1.23164	0.98636	1.39358	1.4937	1.25391	1.3764	1.1246	1.46139	1.44017	1.31031	1.49069	1.33791	1.02273	0.935689	1.00733	1.3813	1.51523	1.41826	1.18346	1.26814	1.31649	1.39693	1.32298	1.41558	1.25515	1.364	1.23113	1.56731	1.33766	1.31052	0.905157	1.35538	1.55776	1.41602	1.38923
Metastasis-promoting	1.61808	1.66233	1.63211	1.58479	1.60944	1.65224	1.63928	1.67827	1.69847	1.50832	1.82752	1.63833	1.71208	1.72757	1.7951	1.6672	1.77754	1.56403	1.79868	1.70062	1.7604	1.85421	1.64731	1.76964	1.74524	1.62803	1.73003	1.55494	1.70306	1.70583	1.87611	1.80075	1.66995	1.64451	1.70222	1.88093	1.74851	1.68541	1.69538	1.61121	1.67811	1.77614	1.78382	1.77529	1.50679	1.70426	1.6014	1.75893	1.30479
MHC Class I	0.980617	1.89662	1.84632	1.64585	1.86432	1.89452	1.69032	1.18402	1.25675	1.76278	1.38458	1.90016	1.933	1.12379	1.88	1.29005	1.93736	1.84859	1.73714	1.83216	1.89295	1.30489	1.86764	1.11968	1.89082	1.9282	1.2927	1.84819	1.77793	1.27138	1.92858	1.87507	1.31423	1.84573	1.77316	1.87434	1.86543	1.93795	1.87318	1.82339	1.05689	1.91884	1.91544	1.72763	1.64748	1.26007	1.81256	1.85839	1.91283
Neutrophils	-0.0867836	0.215649	0.193694	0.0933762	0.107835	0.106758	0.371969	0.107107	0.253057	0.0382371	0.478136	0.174604	0.221075	0.381123	0.471051	-0.0830276	0.316344	0.393592	0.270388	0.0396804	0.322212	0.359327	0.13469	0.33877	0.536245	0.202043	0.157472	0.0682039	0.242482	0.109743	0.426565	0.306856	0.300568	0.226485	0.229182	0.534769	0.268274	0.305574	0.308586	0.342269	0.210705	0.445482	0.395098	0.152143	0.0329622	0.34289	0.154249	0.401159	0.0170877
NK cells	-0.23376	-0.119403	-0.409557	-0.310881	-0.484281	-0.00866709	0.0448205	-0.231336	0.0223503	-0.199577	0.375155	-0.0695031	-0.043218	-0.169839	-0.0169201	-0.160123	0.108708	0.0593709	-0.0696912	-0.444295	-0.266178	-0.178578	-0.241285	-0.0871734	-0.322301	-0.103358	-0.238297	-0.0425857	-0.151535	-0.317595	0.0882629	-0.272796	-0.0983426	-0.0176636	-0.129049	-0.0591452	-0.11083	0.121919	-0.0269723	-0.0954006	-0.417248	-0.117278	0.0940684	-0.103266	-0.567437	-0.208634	-0.499203	-0.0891151	-0.260444
pDCs	0.0199191	0.255795	-0.0115753	0.0540717	0.0751643	0.275427	0.308473	0.173025	0.195612	0.0258211	0.541077	0.156919	0.291797	0.237882	0.365968	-0.0680472	0.401187	0.289785	0.377561	0.0265562	0.0558125	0.311568	0.139975	0.231064	0.387231	0.210233	0.223352	0.15015	0.0540238	0.164599	0.358348	0.153374	0.237855	0.202778	0.131019	0.225694	0.2231	0.525615	0.165253	0.326089	0.187864	0.2012	0.279345	-0.076493	-0.0187983	0.254573	0.0241682	0.423006	-0.110161
PI	0.871262	1.15583	1.09194	0.847465	0.987392	1.03381	1.02063	1.03847	1.17604	1.04258	1.20203	0.907845	1.17406	1.15211	1.14682	0.922993	1.25776	1.18211	1.27175	0.971119	1.29499	1.06456	0.952271	1.07554	1.18005	1.14942	1.06146	1.06442	0.929951	1.06446	1.30834	1.2062	1.10302	0.904004	0.889411	1.10806	1.1207	1.27369	1.05891	1.14424	1.0684	1.17068	1.17373	0.910618	0.807495	1.25777	1.04978	1.14369	0.950497
Pro-inflammation	0.10992	0.377515	0.16747	0.158609	0.0928824	0.392413	0.320115	0.412272	0.512747	0.0700041	0.658437	0.553381	0.583284	0.284732	0.619591	0.136372	0.699631	0.474676	0.698375	0.1348	0.304309	0.520736	0.530176	0.457836	0.408182	0.393074	0.470049	0.288479	0.156005	0.262132	0.690403	0.276636	0.395828	0.506034	0.282058	0.620958	0.396463	0.657691	0.190866	0.414369	0.325618	0.413675	0.570224	0.170764	0.151715	0.579765	0.14893	0.500414	0.0934493
T cell co-inhibition	-0.272371	-0.10545	-0.0286999	-0.252347	-0.205918	0.0580864	-0.102746	-0.0539072	-0.0318445	-0.188003	0.250504	0.0735916	0.0973912	-0.132186	0.13962	-0.271891	0.358446	0.0373095	0.209165	-0.00917438	-0.023994	0.0175241	-0.165234	0.117706	-0.0218701	0.0244369	-0.0184947	0.0319048	-0.167824	-0.149379	0.405561	-0.0401592	0.146616	0.0256987	-0.118625	0.239951	-0.175668	0.258238	-0.0383253	-0.128739	-0.0946111	0.106638	0.246123	-0.199919	-0.103905	0.13546	-0.0491051	-0.0179118	-0.271232
T cell co-stimulation	-0.0681528	0.101595	-0.062924	0.0491542	-0.0941626	0.111709	0.12664	0.254892	0.133733	-0.157135	0.379773	0.220895	0.197707	0.0602328	0.299725	-0.0956517	0.383865	0.134072	0.361265	-0.0483166	0.148105	0.31136	0.104452	0.212818	0.192775	0.174177	0.210734	0.0597595	0.00511853	0.0317857	0.359087	-0.00580277	0.205411	0.0527444	0.0456301	0.322941	0.135221	0.336487	0.048737	0.0950964	0.0510451	0.275589	0.267051	-0.100369	-0.0775285	0.180201	-0.0355791	0.118401	0.00690658
TILs	0.200173	0.35704	0.273319	0.240652	0.18736	0.362359	0.403021	0.457705	0.466944	0.0755235	0.689134	0.461308	0.458991	0.375416	0.579409	0.153716	0.602774	0.447367	0.586107	0.22744	0.459141	0.573394	0.352854	0.490359	0.504038	0.358401	0.400326	0.29715	0.299061	0.285043	0.661567	0.395594	0.377897	0.476392	0.3231	0.630845	0.44366	0.599881	0.327144	0.36514	0.265596	0.534343	0.589805	0.199325	0.156876	0.513184	0.256205	0.472541	0.0202171
Treg	1.09132	1.27475	1.33853	1.14404	1.12226	1.46436	1.24695	1.34183	1.29703	1.17098	1.53258	1.26105	1.27908	1.27827	1.4688	1.0475	1.59803	1.36393	1.58543	1.12314	1.41042	1.40122	1.1888	1.34576	1.37436	1.32708	1.37825	1.16653	1.15266	1.19752	1.62821	1.33037	1.38463	1.25532	1.14513	1.46735	1.35839	1.50357	1.25847	1.21915	1.11696	1.39595	1.37347	1.09189	1.22683	1.3092	1.31115	1.21943	0.949864
Type I IFN Reponse	0.979195	1.24218	1.11938	0.867198	1.0796	1.08008	1.04383	1.09372	1.38619	1.23007	1.34964	0.905103	1.34894	1.29948	1.1477	1.0062	1.35266	1.32443	1.394	1.15013	1.41067	1.11342	1.03591	1.1883	1.21859	1.29865	1.1163	1.14972	0.880832	1.16133	1.43461	1.34767	1.09137	0.905786	0.881029	1.08667	1.22426	1.40131	0.94909	1.02518	1.14707	1.3033	1.13989	0.956872	0.798833	1.32933	1.12763	1.29004	1.27729
Type II IFN Reponse	0.209783	0.139361	-0.100277	-0.0924394	0.0105071	0.154971	0.226487	0.136943	-0.0706456	0.0321676	0.294885	-0.0816691	0.0989304	0.15563	0.190062	-0.419925	0.0657283	0.0321868	0.0557949	0.1249	0.029508	-0.0884719	-0.109707	0.252255	0.10486	-0.0724264	-0.0966413	-0.162033	0.00400739	0.0949472	0.00466046	0.0392803	-0.0592805	-0.0810505	0.14955	0.108451	0.157666	0.161654	0.102814	-0.0362272	0.0750066	0.123573	0.0987917	0.0104903	0.0158011	0.163471	-0.107189	0.348008	0.00178816
TP53-wildtype BCs in METABRIC
sample	BRCA-METABRIC-S1-MB-0005	BRCA-METABRIC-S1-MB-0006	BRCA-METABRIC-S1-MB-0014	BRCA-METABRIC-S1-MB-0022	BRCA-METABRIC-S1-MB-0035	BRCA-METABRIC-S1-MB-0036	BRCA-METABRIC-S1-MB-0039	BRCA-METABRIC-S1-MB-0054	BRCA-METABRIC-S1-MB-0056	BRCA-METABRIC-S1-MB-0060	BRCA-METABRIC-S1-MB-0066	BRCA-METABRIC-S1-MB-0068	BRCA-METABRIC-S1-MB-0081	BRCA-METABRIC-S1-MB-0083	BRCA-METABRIC-S1-MB-0093	BRCA-METABRIC-S1-MB-0095	BRCA-METABRIC-S1-MB-0097	BRCA-METABRIC-S1-MB-0101	BRCA-METABRIC-S1-MB-0106	BRCA-METABRIC-S1-MB-0111	BRCA-METABRIC-S1-MB-0112	BRCA-METABRIC-S1-MB-0114	BRCA-METABRIC-S1-MB-0116	BRCA-METABRIC-S1-MB-0117	BRCA-METABRIC-S1-MB-0119	BRCA-METABRIC-S1-MB-0120	BRCA-METABRIC-S1-MB-0121	BRCA-METABRIC-S1-MB-0122	BRCA-METABRIC-S1-MB-0123	BRCA-METABRIC-S1-MB-0124	BRCA-METABRIC-S1-MB-0125	BRCA-METABRIC-S1-MB-0128	BRCA-METABRIC-S1-MB-0131	BRCA-METABRIC-S1-MB-0133	BRCA-METABRIC-S1-MB-0134	BRCA-METABRIC-S1-MB-0136	BRCA-METABRIC-S1-MB-0138	BRCA-METABRIC-S1-MB-0139	BRCA-METABRIC-S1-MB-0140	BRCA-METABRIC-S1-MB-0142	BRCA-METABRIC-S1-MB-0143	BRCA-METABRIC-S1-MB-0144	BRCA-METABRIC-S1-MB-0145	BRCA-METABRIC-S1-MB-0147	BRCA-METABRIC-S1-MB-0151	BRCA-METABRIC-S1-MB-0154	BRCA-METABRIC-S1-MB-0155	BRCA-METABRIC-S1-MB-0162	BRCA-METABRIC-S1-MB-0166
APC co-inhibition	0.117941	0.0521312	0.012039	0.127309	-0.504292	-0.00881217	0.065268	0.12009	-0.0347575	0.248798	0.177411	0.00169236	0.0621197	-0.018802	0.136939	-0.0381635	-0.0377903	0.191241	-0.00204476	0.0917728	0.159359	0.0382011	0.0127292	0.020475	0.0149161	0.0320072	0.0545364	-0.0817157	0.120049	0.00601126	-0.100293	0.0674351	-0.0544783	-0.11659	-0.0778485	0.216666	0.0564141	0.0491957	0.103464	-0.0192389	0.00722185	0.0354213	0.0109039	0.101165	-0.00439632	0.169503	0.0590279	-0.0608154	0.0211888
APC co-stimulation	0.186786	0.231079	0.132701	0.331756	-0.181709	-0.00418281	-0.13329	0.193163	0.0864857	0.16228	0.257321	0.0665644	0.351495	0.172771	0.345631	-0.0721617	-0.00642272	0.212908	0.098342	0.133737	0.12153	0.0163693	0.122281	0.136234	0.302152	0.203081	0.135002	0.0709299	0.0505543	0.257957	-0.117385	0.33338	0.0382837	-0.200974	-0.181112	0.324913	0.111187	-0.000889906	-0.0711671	-0.292084	0.0374681	0.219078	0.0599568	-0.0581706	0.197291	0.123842	0.329435	0.209915	0.179312
B cells	-0.0994117	0.0701546	0.0157663	0.285374	-0.189709	-0.112797	-0.147622	0.102216	-0.138621	-0.00467478	0.0635761	-0.0615576	0.257911	0.0718288	0.166784	-0.0758375	-0.1677	0.221454	-0.0190812	-0.034955	0.0890087	-0.0938803	-0.0211202	0.096628	0.054611	0.095591	0.0432984	-0.0420897	-0.0160125	0.236215	-0.159249	0.306338	-0.255413	-0.0314993	-0.134237	0.219751	0.0403063	-0.00679752	0.0500344	-0.159883	0.0454861	-0.00612736	0.00745711	-0.0940664	0.043239	0.0322244	0.289098	0.196053	0.0826826
CCR	0.279637	0.340661	0.364969	0.550846	-0.185439	0.124756	-0.0406224	0.470256	0.0961348	0.403602	0.460649	0.214499	0.601526	0.325959	0.536738	0.146884	0.0414687	0.460433	0.25498	0.24724	0.322793	0.182959	0.311273	0.366829	0.386157	0.352404	0.281364	0.2126	0.242355	0.504853	0.0701116	0.540415	0.113202	0.154829	0.113941	0.542188	0.308023	0.297295	0.233158	-0.0215676	0.139294	0.404987	0.215493	0.105681	0.223051	0.331482	0.620368	0.398588	0.259363
CD4+ Regulatory T cells	-0.282504	-0.188505	-0.475582	-0.241246	-0.375214	-0.523009	-0.244387	-0.0361754	-0.500203	-0.228707	-0.219087	-0.348988	-0.00076355	-0.188228	-0.322099	-0.627006	-0.424597	-0.251584	-0.279246	-0.491143	-0.2746	-0.494337	-0.150698	-0.0765854	-0.162979	-0.166954	-0.524684	-0.508378	-0.516489	-0.205783	-0.414909	-0.275037	-0.563151	-0.191974	-0.128368	-0.258309	-0.250703	-0.41177	-0.397011	-0.600362	-0.308237	-0.238563	-0.513276	-0.269381	-0.229384	-0.401077	-0.275001	-0.297238	-0.211641
CD8+ T cells	0.163019	0.251945	0.296263	0.439037	-0.427011	0.109421	-0.19943	0.421643	0.145832	0.356602	0.402501	0.175128	0.469831	0.225604	0.450522	0.0568224	0.2095	0.373663	0.167887	0.174337	0.276247	0.199097	0.232346	0.35835	0.30804	0.339249	0.157734	0.127689	0.200262	0.250114	-0.124402	0.280117	0.111751	0.25465	-0.0877408	0.394012	0.26239	0.347156	0.240377	0.175711	0.280783	0.371874	0.240502	0.164725	0.264554	0.231638	0.391432	0.323478	0.182244
Immune checkpoint	0.219137	0.28007	0.184362	0.445691	-0.115198	0.0249766	-0.206203	0.377232	0.0116202	0.403677	0.27271	0.0799688	0.539644	0.169811	0.511975	-0.0767656	0.101665	0.318127	0.160991	0.135835	0.178399	0.0836659	0.119256	0.229883	0.303756	0.316348	0.226063	0.0155776	0.101519	0.301285	-0.0286924	0.395139	0.0214804	0.109725	0.0624284	0.445534	0.133435	0.126637	0.0866807	-0.132293	0.131746	0.267586	0.113645	0.0508799	0.22803	0.143978	0.40738	0.216209	0.216501
CT	-0.605442	-0.604423	-0.561377	-0.668129	-0.681765	-0.63269	-0.442781	-0.57284	-0.399041	-0.24655	-0.649717	-0.672048	-0.608648	-0.498892	-0.674793	-0.568743	-0.665272	-0.699576	-0.72624	-0.682626	-0.750987	-0.708963	-0.692778	-0.642525	-0.628717	-0.657349	-0.67406	-0.661324	-0.62488	-0.773619	-0.662973	-0.768621	-0.632698	-0.708726	-0.675804	-0.709924	-0.688005	-0.711715	-0.743092	-0.616668	-0.669561	-0.668686	-0.803896	-0.611985	-0.602389	-0.746847	-0.852109	-0.663436	-0.664867
Cytolytic activity	0.13718	0.207012	0.204558	0.352372	-0.273726	0.0822859	-0.0762525	0.261603	0.0459762	0.374596	0.300937	0.177896	0.382864	0.166445	0.332469	-0.0267526	0.0620079	0.3177	0.0374078	0.123729	0.217126	0.10394	0.117541	0.271297	0.259234	0.264124	0.158373	-0.0418452	0.115685	0.260936	0.00713902	0.241208	0.00924424	0.157636	0.00191547	0.300528	0.151296	0.263632	0.111429	-0.00339903	0.145743	0.276324	0.102869	0.127635	0.172178	0.144719	0.336072	0.18794	0.056383
HLA	0.894595	1.0419	1.07358	1.32269	0.780988	1.0932	0.870834	1.26471	0.916621	1.07447	1.10845	1.05904	1.33093	1.07748	1.29236	0.86898	0.804148	1.11191	1.12536	0.917482	1.17495	0.906913	0.889601	1.06101	0.862646	1.07873	0.967518	0.85527	0.99716	1.03166	0.803463	1.16691	0.958089	0.795576	0.944147	1.12186	0.942233	1.01812	0.950203	0.76394	1.01763	1.06071	0.877459	0.943975	0.846604	1.02232	1.19518	1.23946	1.00125
Immune cell infiltrate	0.0828061	0.0373855	0.0534861	0.296744	-0.0929185	0.0404041	-0.248815	0.150206	-0.184585	0.280814	0.186706	-0.0849762	0.366675	0.0990748	0.218139	0.0778299	-0.0154483	0.326316	0.0279724	0.137144	0.208564	-0.0828994	0.135432	0.135404	0.237392	0.194541	0.0168457	-0.0735774	0.0614806	0.37784	-0.129664	0.374243	-0.0457211	0.0686378	0.0063119	0.320585	0.0800313	0.172679	0.0590365	-0.0960326	0.21213	0.246988	0.0371644	-0.00825911	0.0955794	0.00060003	0.300989	0.203312	0.0895038
Macrophages	0.947887	0.817844	0.763014	0.902196	0.485519	0.772319	0.535066	0.874844	0.811584	0.944371	0.888424	0.751648	0.757715	0.637788	0.835814	0.871214	0.735816	0.892815	0.806484	0.826601	0.75799	0.648631	0.687615	0.871876	0.849271	0.863949	0.936787	0.800223	0.77062	0.882302	0.815887	0.788897	0.979982	0.750359	0.910974	0.997088	0.704047	0.720891	0.813131	0.623242	0.770768	0.961562	0.695559	1.00399	0.90897	0.834356	0.956738	0.817129	0.770435
Metastasis-inhibiting	1.04137	1.3717	0.962674	1.23121	1.35411	1.20852	1.30343	0.936692	0.91866	1.31035	1.57804	1.04023	0.974643	1.25078	1.2289	1.39912	1.3038	1.45798	1.20185	1.22462	1.38982	1.25546	1.06537	1.54658	1.42718	1.42999	1.37702	1.2734	0.929959	1.1591	1.53943	1.44402	1.26794	1.29714	1.29268	1.45712	1.45726	1.21662	1.32432	1.44183	1.07037	1.42539	1.08635	1.25281	1.41528	1.34424	1.317	1.447	1.45463
Metastasis-promoting	1.59172	1.70428	1.67842	1.7844	1.48182	1.68635	1.37022	1.60866	1.55673	1.57761	1.70329	1.63836	1.86468	1.61616	1.74527	1.59859	1.63997	1.73978	1.5871	1.68555	1.58215	1.65493	1.7091	1.63005	1.64389	1.72195	1.71412	1.64982	1.58379	1.76458	1.66632	1.76106	1.7108	1.57267	1.62653	1.84278	1.71349	1.70988	1.77154	1.46602	1.62396	1.75615	1.57671	1.61625	1.63106	1.57422	1.77514	1.7374	1.70567
MHC Class I	1.06626	1.79445	1.69776	1.85875	1.71063	1.86982	1.85771	1.86108	0.942878	1.92525	1.9272	1.80587	1.8805	1.64091	1.86484	1.77098	1.76954	1.88556	1.82311	1.77723	1.88504	1.65543	1.75677	1.89733	1.21322	1.85453	1.85629	1.19246	1.77095	1.82579	1.79387	1.88555	1.19501	1.64009	1.33504	1.89589	1.73612	1.83688	1.72838	1.67892	1.83686	1.87424	1.80579	1.13744	1.18498	1.14521	1.87116	1.85457	1.78399
Neutrophils	0.269483	0.216822	0.232056	0.32572	-0.0905385	0.173515	0.110749	0.176951	0.172089	0.123659	0.471876	0.250515	0.441117	0.265846	0.360202	0.160737	-0.022695	0.297439	0.123511	0.296088	0.319336	0.140162	0.211952	0.383082	0.161682	0.262901	0.241381	0.118772	0.280184	0.325278	0.0868464	0.369096	0.365544	0.27269	0.224762	0.481634	0.275889	0.18853	0.238732	0.17048	0.364235	0.399517	0.244989	-0.0228341	0.237173	0.161072	0.521379	0.243436	0.285821
NK cells	-0.227388	-0.0477959	0.0416539	0.218363	-0.0563071	-0.35469	0.142181	0.0357705	-0.0340591	-0.110531	0.0248634	-0.161866	0.325097	-0.0324787	0.203505	-0.117898	-0.282738	-0.256044	-0.236223	-0.107371	-0.252661	-0.362121	-0.0862759	-0.243556	-0.23309	-0.327852	-0.00364639	-0.153199	-0.0686073	-0.179235	-0.557609	-0.2184	-0.356874	-0.400982	-0.552094	0.0139642	-0.432855	-0.208819	-0.171583	-0.146905	-0.313021	-0.133735	-0.358491	-0.12359	-0.30477	-0.0272033	-0.157132	-0.31037	-0.45358
pDCs	0.118485	0.106394	0.0463185	0.260593	-0.220647	-0.00339852	0.00104662	0.182972	-0.054296	0.336241	0.347163	0.0395981	0.39806	0.206431	0.230361	0.0968517	0.0487121	0.295127	0.00331662	0.0242691	0.226291	-0.065053	0.0931122	0.164995	0.270279	0.201958	0.0850358	0.0201851	0.0229257	0.272382	0.0873592	0.430044	-0.0401544	0.0242862	-0.0570624	0.290241	0.135294	0.0254218	0.0043524	-0.277638	0.152687	0.0296857	-0.0560998	-0.0191376	0.113275	0.00477892	0.244225	0.175985	0.12054
PI	1.08352	1.09482	1.01197	1.12921	0.59048	0.800213	0.857398	1.17404	0.91001	1.15049	1.2105	1.11845	1.08609	0.989812	1.20366	0.771874	0.704162	1.09402	0.834751	0.986827	1.11699	0.81704	0.853589	0.970626	0.984484	1.05239	0.957446	0.829535	0.946957	1.03049	0.973282	1.05053	0.963916	0.791295	1.01218	1.18116	0.984211	0.875131	1.0269	0.678114	0.942267	1.04805	0.91057	0.929929	1.0052	1.01063	1.05913	0.982343	0.992529
Pro-inflammation	0.178631	0.389071	0.290226	0.566125	-0.00226965	0.0628756	0.0367098	0.444158	-0.0189833	0.556148	0.524346	0.199382	0.678804	0.27962	0.54836	0.10755	0.0921818	0.55925	0.101688	0.166731	0.35963	0.207581	0.156649	0.450948	0.365401	0.509055	0.194631	0.0451011	0.169238	0.436988	0.0549752	0.448836	0.0421276	0.0939789	0.147079	0.491509	0.27455	0.238586	0.23364	0.0610386	0.277505	0.430881	0.152684	0.148309	0.246473	0.300447	0.521888	0.367542	0.249846
T cell co-inhibition	-0.106294	-0.00712895	-0.06586	0.197042	-0.374934	-0.224093	-0.22717	0.0634506	-0.215126	0.182326	0.0160006	-0.147156	0.221906	-0.0548464	0.195879	-0.31555	-0.136293	0.0938876	-0.230445	-0.247867	-0.0649412	-0.188937	-0.2225	0.0456903	-0.00638474	-0.0168976	-0.101168	-0.21099	-0.0851598	0.0641611	-0.212499	0.025352	-0.217971	-0.0943391	-0.134037	0.11875	-0.238964	-0.187526	-0.0886447	-0.307462	-0.188932	-0.062001	-0.249864	-0.051164	-0.130524	-0.0825088	-0.0120555	-0.144246	-0.168795
T cell co-stimulation	-0.00830409	0.0614325	0.0416403	0.298194	-0.116889	-0.0611888	-0.320799	0.24064	-0.214293	0.244781	0.219621	-0.0404407	0.376912	0.00237285	0.293799	-0.0929589	-0.0684792	0.197711	0.022761	0.0156761	0.0844734	0.00217723	0.0192168	0.20026	0.233894	0.115621	0.0113134	-0.145935	-0.0189465	0.23068	-0.109198	0.297692	-0.208895	-0.0200782	-0.108958	0.275058	0.106485	0.0587451	0.0275353	-0.0385114	0.0245703	0.152451	0.107468	-0.0285866	0.142193	-0.0108776	0.331809	0.188533	0.14416
TILs	0.26631	0.36614	0.372534	0.623506	0.0645645	0.186597	0.0237354	0.525708	0.217946	0.457422	0.49867	0.327826	0.671322	0.344145	0.58728	0.21181	0.157146	0.56678	0.233714	0.279042	0.409096	0.207007	0.322425	0.489798	0.442358	0.487757	0.311036	0.181202	0.328778	0.496828	0.073325	0.56927	0.231501	0.228557	0.214656	0.558594	0.343474	0.343267	0.321251	0.101274	0.359108	0.442995	0.292964	0.315315	0.370656	0.325114	0.582335	0.409306	0.305609
Treg	1.28943	1.3707	1.29862	1.4243	0.900358	1.08712	1.24882	1.43684	1.23652	1.35937	1.33946	1.23993	1.51323	1.33733	1.52098	1.17836	1.18535	1.40293	1.2874	1.21234	1.06033	1.14854	1.15631	1.30048	1.18482	1.27918	1.16229	1.15036	1.18055	1.30717	1.10336	1.34503	1.0857	1.16664	1.21745	1.39104	1.19669	1.2072	1.12591	0.949631	1.21115	1.23448	1.11161	0.95421	1.22701	1.27192	1.37945	1.28938	1.10172
Type I IFN Reponse	1.11007	1.18326	1.02448	1.14202	0.78969	0.890873	1.18695	1.22779	1.05186	1.34183	1.37726	1.23816	1.07131	0.969725	1.22814	0.798364	0.667442	1.088	0.9323	0.870315	1.27051	0.828409	0.926551	1.08126	1.03943	1.29395	1.0659	0.909441	0.83072	0.932144	1.16561	1.1174	1.04273	0.877707	1.0649	1.25065	1.08079	0.936975	1.08924	0.758942	0.932049	0.998077	1.04001	1.14661	1.02773	1.01603	0.989636	1.0013	1.14833
Type II IFN Reponse	0.0515493	0.0061308	0.306557	0.177228	-0.303426	-0.0275886	0.0772452	0.100866	0.0917739	-0.103188	0.0334445	0.147042	0.10409	0.284435	0.181918	-0.0843594	0.0147853	0.349137	0.156018	0.0967498	0.134817	-0.0713122	0.188669	0.129614	0.13019	0.0549662	0.18902	0.122651	0.149495	0.357945	0.113844	0.263995	0.0663373	-0.0650817	0.0116992	0.221978	0.132624	0.216214	0.037062	0.109034	-0.0815067	0.0111009	0.0628957	-0.0950784	0.118393	0.155645	0.341638	0.127037	0.126537
[truncated: 1,153 more columns]

## Sheet: Table S4
Table S4. Primer sequences used for real time quantity PCR.
Primer	Sequence(5'to3')	Base Count
HLA-A(H) F	GCAGTTGAGAGCCTACCTGG	20
HLA-A(H) R	GGGTCATATGTGTCTTGGGG	20
HLA-B(H) F	TCCGCAGATACCTGGAGAAC	20
HLA-B(H) R	CTCATGGTCAGAGATGGGGT	20
HLA-C(H) F	TCCGCAGATACCTGGAGAAC	20
HLA-C(H) R	GTGGCCTCATGGTCAGAGAG	20
B2M(H) F	TAGCTGTGCTCGCGCTACT	19
B2M(H) R	TCTCTGCTGGATGACGTGAG	20
TAP1(H) F	TCCGGAAACCGTGTGTACTT	20
TAP1(H) R	TCAGGGCTTTCGTACAGGAG	20
CCND1(H) R	CATGGAGGGCGGATTGGAA	19
CCND1(H) F	CAATGACCCCGCACGATTTC	20
beta actin(H)-F	CATGTACGTTGCTATCCAGGC	21
beta actin(H)-R	CTCCTTAATGTCACGCACGAT	21

## Sheet: Table S5
Table S5. Comparison of the enrichment levels of 15 immune cell types and function signatures between two classes of samples.
Immune cell types and functional genes
	TP53 mutated BCs vs. TP53 wildtype BCs										TP53 mutated BCs vs. normal tissue					TP53 wildtype BCs vs. normal tissue
	TCGA					METABRIC					TCGA					TCGA
	Gene symbol	P-value	Log2(fold change)	FDR		Gene symbol	P-value	Log2(fold change)	FDR		Gene symbol	P-value	Log2(fold change)	FDR		Gene symbol	P-value	Log2(fold change)	FDR
B cells	CD79B	8.60185e-08	0.644948	2.78909e-07		CD79A	1.07484e-27	0.701617	4.38535e-27		FCRL3	8.76634e-09	1.20791	2.18139e-08		RALGPS2	5.22031e-27	1.27149	3.28572e-26
	CD79A	7.21294e-07	0.831737	1.60788e-06		CD79B	3.58292e-26	0.55801	1.1789e-25		FCRL1	0.00610025	0.549393	0.00894147		FCRL3	0.00376029	0.588611	0.00619001
	BTLA	2.98493e-06	0.579622	5.60329e-06		BTLA	1.59963e-22	0.174616	4.40979e-22		BLK	0.0244984	0.50337	0.0331814		BTLA	0.0394401	-0.35414	0.0520998
	FCRL3	1.58193e-05	0.619296	2.77486e-05		BANK1	1.30669e-14	0.283333	2.66565e-14		CD79A	0.0389924	0.517416	0.0508804		CD79A	0.185547	-0.31432	0.225609
	BACH2	0.00382776	0.264146	0.00546094		FCRL3	7.77126e-12	0.0903457	1.4679e-11		BTLA	0.214335	0.225482	0.2466		BLK	0.219046	0.261316	0.260421
	FCRL1	0.0126953	0.331217	0.0167703		BLK	4.90376e-11	0.141354	8.62385e-11		RALGPS2	0.734846	0.0570749	0.763384		FCRL1	0.246436	0.218177	0.289765
	BANK1	0.0169698	0.325717	0.0216162		BACH2	1.7113e-06	0.0733172	2.49361e-06		BACH2	1.83447e-34	-1.60683	1.63574e-33		BACH2	2.81721e-40	-1.87098	2.51201e-39
	HVCN1	0.016964	0.147702	0.0218692		HVCN1	0.00115426	0.042562	0.00143579		BANK1	2.22922e-15	-1.76346	7.6944e-15		BANK1	3.07823e-25	-2.08918	1.73353e-24
	BLK	0.108271	0.242054	0.12457		RALGPS2	1.03226e-23	-0.173821	3.0083e-23		CD79B	0.0109814	-0.412134	0.0156668		CD79B	7.3345e-10	-1.05708	2.06524e-09
	RALGPS2	9.85374e-37	-1.21441	1.05435e-34							HVCN1	0.0187631	-0.215824	0.0260735		HVCN1	2.68029e-05	-0.363526	5.31094e-05
CD4+ Regulatory T cells	CTLA4	1.6803e-22	1.17886	2.56846e-21		CTLA4	1.87262e-69	0.518027	6.36692e-68		FOXP3	4.97483e-63	2.7455	1.77435e-61		FOXP3	6.47074e-38	1.8762	5.32591e-37
	FOXP3	1.69335e-19	0.869307	1.64717e-18		IL32	2.86594e-55	0.591493	3.65407e-54		CTLA4	2.90024e-19	1.57794	1.2413e-18		IL32	0.00167684	0.405805	0.0028939
	IL32	5.03202e-16	0.767755	3.36516e-15		C15orf53	0.121304	0.00966482	0.135968		IL32	4.07142e-16	1.17356	1.45214e-15		CTLA4	0.0194227	0.39908	0.0273452
	C15orf53	2.27164e-06	0.186866	4.34045e-06		GPR15	0.270747	0.0067757	0.296949		C15orf53	2.66896e-06	0.300802	5.59958e-06		C15orf53	0.0314031	0.113937	0.0420016
	GPR15	0.132626	0.146287	0.149378		IL4	0.552615	0.00402373	0.581101		GPR15	2.94513e-10	-1.09026	7.87822e-10		GPR15	1.36209e-15	-1.23655	5.60553e-15
	IL4	0.862973	0.00263401	0.871114		IL5	0.755107	0.00211184	0.762583		IL5	0.00722199	-0.12246	0.0104426		IL5	0.0121097	-0.103659	0.0179964
	IL5	0.501874	-0.0188012	0.516351		FOXP3	0.81548	0.00199827	0.81548		IL4	0.0299235	-0.0542496	0.0400227		IL4	0.0140349	-0.0568836	0.0205717
CD8+ T cells	CD8A	0.000531668	0.39094	0.000801247		CD8A	2.09206e-26	0.540642	7.11301e-26		CD8A	0.0435858	0.339115	0.0561889		CD8A	0.745789	-0.0518242	0.782347
Macrophages	LGMN	1.52327e-23	0.480785	3.25979e-22		MMP9	1.75399e-39	0.938616	1.37621e-38		CLEC5A	5.04888e-64	3.06677	2.70115e-62		CLEC5A	2.69104e-61	2.76888	7.19852e-60
	GPNMB	5.52104e-14	0.554153	3.10922e-13		LGMN	3.47564e-24	0.360292	1.04269e-23		MMP9	4.00652e-48	3.3936	6.12425e-47		MMP9	1.04396e-29	2.42827	6.9815e-29
	MMP9	8.40485e-13	0.965334	4.4966e-12		GPNMB	4.85124e-19	0.408201	1.20689e-18		CD68	5.20149e-05	0.440361	8.97676e-05		FUCA1	0.00361873	0.194021	0.0061461
	CD68	1.10702e-07	0.342993	3.38432e-07		CYBB	2.35944e-16	0.293622	5.01382e-16		TM4SF19	0.00277235	0.600478	0.00417804		CD68	0.315506	0.0973679	0.359139
	TM4SF19	1.70984e-07	0.654827	4.94468e-07		CD68	3.01896e-11	0.214509	5.40236e-11		HS3ST2	0.0357089	-0.352053	0.0471711		TM4SF19	0.77787	-0.0543493	0.800309
	C11orf45	2.94884e-07	0.332928	7.51251e-07		C11orf45	9.78965e-05	0.0387771	0.000124818		LGMN	0.253719	-0.0979274	0.282791		GPNMB	8.06655e-18	-0.910329	3.59634e-17
	CYBB	3.3509e-05	0.366539	5.60228e-05		HS3ST2	0.00624119	0.0639968	0.00740235		CYBB	0.689518	0.0544371	0.723318		LGMN	1.9095e-15	-0.578713	7.56727e-15
	CLEC5A	0.00476985	0.297896	0.00671545		FUCA1	1.07557e-38	-0.37054	7.83628e-38		C11orf45	0.822155	0.0231305	0.845871		HS3ST2	2.4069e-05	-0.629666	4.95266e-05
	HS3ST2	0.00665307	0.277613	0.00924517		TM4SF19	0.0054628	-0.0875461	0.00655537		FUCA1	1.64135e-05	-0.35647	3.028e-05		C11orf45	0.000481929	-0.309797	0.000874007
	FUCA1	9.41548e-27	-0.550491	5.03728e-25		CLEC5A	0.00667342	-0.0844556	0.00782401		GPNMB	0.00135057	-0.356177	0.00215688		CYBB	0.0116427	-0.312101	0.0177968
Neutrophils	VNN3	1.1925e-08	0.695566	4.3999e-08		SELL	9.86113e-21	0.372738	2.57906e-20		SELL	1.42883e-08	1.02346	3.39744e-08		NLRP12	7.89663e-11	0.8419	2.48511e-10
	MNDA	0.00328269	0.223727	0.0047466		VNN3	3.80668e-20	0.166528	9.70702e-20		MNDA	3.18189e-05	0.496793	5.77055e-05		SELL	8.6036e-07	0.76692	2.04575e-06
	EVI2B	0.0111658	0.212014	0.0151232		EVI2B	2.66904e-12	0.289268	5.13665e-12		NLRP12	0.00208783	0.44642	0.00328526		MNDA	0.0116442	0.273066	0.0175483
	SELL	0.0240416	0.256545	0.0292324		PADI4	8.0282e-05	0.0593546	0.000103655		VNN3	0.00446075	0.583852	0.00662918		TRANK1	0.301378	0.0811353	0.346747
	PADI4	0.192663	0.0913922	0.210357		MNDA	0.00143986	0.087599	0.0017484		EVI2B	0.0570499	0.236799	0.0693675		EVI2B	0.832361	0.0247846	0.832361
	MEGF9	6.46599e-26	-0.761821	2.3062e-24		TRANK1	0.626867	0.0113001	0.652453		HSD17B11	7.80452e-43	-1.58645	9.2787e-42		HSD17B11	1.76229e-50	-1.43103	2.35706e-49
	TRANK1	4.3253e-07	-0.299366	1.02846e-06		MEGF9	3.14899e-31	-0.240284	1.60598e-30		MEGF9	5.80422e-13	-0.7852	1.77443e-12		PADI4	2.16422e-08	-0.605591	5.64809e-08
	NLRP12	1.73694e-05	-0.39548	2.99762e-05		NLRP12	1.01878e-07	-0.0682005	1.55098e-07		KDM6B	1.07409e-10	-0.392764	3.02442e-10		KDM6B	1.11366e-05	-0.24336	2.43188e-05
	KDM6B	0.000103489	-0.149404	0.000162842		HSD17B11	0.1378	-0.0562281	0.152778		PADI4	4.3837e-05	-0.514199	7.68945e-05		VNN3	0.474847	-0.111714	0.518456
	HSD17B11	0.0159515	-0.15542	0.0208147		KDM6B	0.704253	-0.00467397	0.718338		TRANK1	0.01942	-0.218231	0.0266403		MEGF9	0.807292	-0.0233798	0.814908
NK cells	KLRC1	3.54609e-06	0.49524	6.43104e-06		KLRC1	9.63755e-12	0.075237	1.78733e-11		KLRF1	2.90473e-21	-1.46635	1.35133e-20		KLRF1	1.62921e-31	-1.55735	1.24518e-30
	KLRF1	0.325547	0.0910008	0.344886		KLRF1	1.95884e-07	0.0840257	2.93826e-07		KLRC1	4.45665e-06	-0.828535	8.99738e-06		KLRC1	1.76049e-18	-1.32378	8.56239e-18
pDCs	GZMB	2.80324e-23	1.45628	4.99912e-22		GZMB	2.02599e-75	1.00343	2.06651e-73		IRF7	6.22205e-30	1.52429	4.161e-29		IRF7	2.49025e-51	1.70592	3.80652e-50
	PHEX	8.34068e-10	0.719759	3.43251e-09		CXCR3	2.01254e-30	0.352937	8.92518e-30		CXCR3	9.1248e-15	1.38155	3.05111e-14		PTCRA	2.08965e-10	0.697637	6.2109e-10
	CXCR3	5.72756e-06	0.547073	1.02142e-05		PHEX	2.5126e-24	0.188255	7.76621e-24		PTCRA	5.9614e-11	0.793512	1.72397e-10		LILRA4	2.45473e-07	0.874709	6.10829e-07
	CLEC4C	3.26846e-05	0.356834	5.5512e-05		IRF8	6.04725e-18	0.3779	1.46862e-17		GZMB	4.42409e-09	1.29789	1.12709e-08		CXCR3	1.33525e-06	0.834473	3.03982e-06
	IRF8	0.00321954	0.25781	0.00471905		PTCRA	1.47875e-10	0.0632076	2.55648e-10		PHEX	1.2135e-08	1.07242	2.95101e-08		PLD4	0.000319142	0.610219	0.000599092
	PTCRA	0.20951	0.0958746	0.22644		CLEC4C	1.69374e-10	0.072428	2.87936e-10		CLEC4C	6.10255e-06	0.623155	1.20921e-05		CLEC4C	0.0232217	0.266322	0.0318554
	PLD4	5.96932e-17	-0.999868	4.25811e-16		IL3RA	6.56098e-06	0.0405178	9.16739e-06		LILRA4	1.47416e-05	0.87083	2.76728e-05		PHEX	0.0270513	0.35266	0.0366391
	IRF7	0.0193757	-0.181627	0.0243906		IRF7	1.26348e-05	0.151238	1.74155e-05		IL3RA	1.41077e-18	-0.900381	5.59084e-18		IL3RA	1.50434e-16	-0.803997	6.43859e-16
	IL3RA	0.143719	-0.0963841	0.160187		PLD4	0.281138	-0.0085642	0.305065		PLD4	0.046416	-0.389649	0.0591252		IRF8	0.00753248	-0.329806	0.0118526
	LILRA4	0.973745	-0.00387955	0.973745		LILRA4	0.331379	-0.0104777	0.355796		IRF8	0.573967	-0.0719961	0.608064		GZMB	0.420019	-0.15839	0.46332
MHC Class I	TAP1	6.04179e-22	0.774256	7.18302e-21		TAP1	1.7153e-74	0.822054	8.74801e-73		TAP1	7.82031e-33	1.58595	6.43672e-32		TAP1	1.51516e-14	0.811695	5.22974e-14
	HLA-A	2.1444e-09	0.448769	8.19468e-09		B2M	1.9493e-08	0.223599	3.15601e-08		HLA-A	4.16282e-12	0.788005	1.23728e-11		HLA-A	0.00088162	0.339237	0.00154645
	B2M	2.30555e-07	0.316175	6.01692e-07		HLA-A	0.000116083	0.414074	0.000146179		B2M	0.00213549	0.27468	0.00326426		B2M	0.629406	-0.0414951	0.666796
APC Co-stimulation	CD58	2.56985e-17	0.369134	2.11518e-16		ICOSLG	8.5177e-52	0.231392	9.65339e-51		TNFSF4	9.4562e-45	1.79267	1.26477e-43		TNFSF4	3.09414e-45	1.74628	3.67858e-44
	CD70	1.68662e-12	0.705676	8.59373e-12		CD40	5.9591e-32	0.279353	3.1991e-31		ICOSLG	1.05853e-07	0.531769	2.46224e-07		ICOSLG	0.0730442	0.154824	0.0930444
	TNFSF9	2.63897e-12	0.613647	1.2835e-11		SLAMF1	8.75787e-31	0.277792	4.25382e-30		CD70	1.9384e-07	0.939533	4.41296e-07		CD70	0.110805	0.233857	0.136278
	ICOSLG	7.37875e-10	0.376945	3.28969e-09		CD70	1.41122e-27	0.148059	5.53631e-27		TNFSF9	7.39879e-05	0.57702	0.000123698		TNFSF8	0.283649	0.127763	0.329896
	TNFSF15	9.5295e-08	0.599642	2.99899e-07		TNFSF14	1.34749e-17	0.129993	3.19636e-17		SLAMF1	0.0560735	0.343358	0.0697659		TNFSF18	0.805315	0.0246377	0.820654
	SLAMF1	1.98856e-07	0.642485	5.45579e-07		CD58	1.60673e-11	0.183567	2.92654e-11		TNFSF8	0.0589826	0.236312	0.0709116		CD40	2.77356e-18	-0.855503	1.29031e-17
	CD40	4.54694e-07	0.352782	1.05766e-06		TNFSF4	3.24135e-08	0.159024	5.1659e-08		TNFSF18	0.185176	0.160078	0.217735		CD58	9.05856e-10	-0.354644	2.4853e-09
	TNFSF14	7.22521e-07	0.448461	1.57775e-06		TNFSF9	4.75353e-06	0.0406253	6.73416e-06		TNFSF14	0.426053	-0.110044	0.469976		TNFSF14	1.31448e-05	-0.558504	2.75783e-05
	TNFSF18	0.055051	0.13544	0.0661849		TNFSF18	0.0377429	0.0158024	0.0432559		CD58	0.838167	0.0144897	0.846074		TNFSF15	0.000261151	-0.591875	0.000498984
	TNFSF8	0.188749	0.108549	0.208208		TNFSF15	0.677875	0.00348711	0.698417		TNFSF15	0.963439	0.00776722	0.963439		SLAMF1	0.0838972	-0.299126	0.104384
	TNFSF4	0.55688	0.0463992	0.567487							CD40	1.00557e-06	-0.502721	2.19583e-06		TNFSF9	0.776327	-0.0366271	0.806476
T cell Co-stimulation	TNFRSF9	1.61675e-19	1.04019	1.72992e-18		ICOS	8.90139e-59	0.488951	1.51324e-57		TNFRSF9	4.18857e-51	2.77213	7.46962e-50		TNFRSF18	3.64817e-43	2.45882	3.90354e-42
	ICOS	2.38072e-19	1.1592	2.12281e-18		TNFRSF4	1.64801e-39	0.368071	1.4008e-38		TNFRSF18	4.34374e-32	2.23796	3.31986e-31		TNFRSF9	2.43443e-25	1.73193	1.44713e-24
	TNFRSF8	3.62426e-08	0.505248	1.25095e-07		TNFRSF9	1.90062e-38	0.190824	1.29242e-37		ICOS	5.94447e-25	1.92274	3.34767e-24		TNFRSF4	3.04363e-15	0.990812	1.1631e-14
	SLAMF1	1.98856e-07	0.642485	5.45579e-07		CD2	2.57754e-34	0.693133	1.4606e-33		TNFRSF4	3.35331e-23	1.42323	1.79402e-22		ICOS	2.51931e-05	0.763534	5.08616e-05
	CD2	3.30622e-07	0.619509	8.2271e-07		SLAMF1	8.75787e-31	0.277792	4.25382e-30		CD2	4.45426e-06	0.776565	9.1655e-06		CD27	0.20226	0.225435	0.243166
	CD226	3.98471e-07	0.470591	9.69009e-07		CD27	4.84299e-25	0.395112	1.5437e-24		CD27	7.19537e-06	0.813241	1.39983e-05		CD2	0.361379	0.157057	0.407027
	TNFSF14	7.22521e-07	0.448461	1.57775e-06		TNFSF14	1.34749e-17	0.129993	3.19636e-17		SLAMF1	0.0560735	0.343358	0.0697659		TNFRSF8	3.85702e-41	-1.83819	3.75182e-40
	TNFRSF4	7.16913e-07	0.432422	1.63212e-06		TNFRSF25	5.26763e-15	0.26164	1.09653e-14		CD226	0.100012	0.222259	0.118903		CD40LG	7.08582e-07	-0.868358	1.72314e-06
	CD27	2.05601e-06	0.587806	3.99987e-06		CD226	1.37534e-14	0.070319	2.75068e-14		CD28	0.829838	0.0302151	0.845644		TNFSF14	1.31448e-05	-0.558504	2.75783e-05
	CD28	0.000177995	0.352166	0.000272078		CD28	1.18286e-08	0.0600544	1.946e-08		TNFRSF8	1.02735e-20	-1.33294	4.58025e-20		TNFRSF25	0.00037532	-0.481433	0.000692401
	TNFRSF25	0.00106478	0.312797	0.00158238		TNFRSF8	9.14923e-08	0.0532381	1.41397e-07		CD40LG	0.00210336	-0.536088	0.00326174		CD28	0.0179488	-0.321951	0.0259529
	CD40LG	0.00682502	0.33227	0.00936253		CD40LG	4.1803e-07	0.0577122	6.17957e-07		TNFRSF25	0.200478	-0.168636	0.233164		CD226	0.0581782	-0.248332	0.0750009
	TNFRSF18	0.0618632	-0.220853	0.0735484		TNFRSF18	3.25064e-06	-0.125724	4.66993e-06		TNFSF14	0.426053	-0.110044	0.469976		SLAMF1	0.0838972	-0.299126	0.104384
APC Co-inhibition	PDCD1LG2	5.96919e-17	0.721806	4.56217e-16		LGALS9	2.74384e-30	0.350823	1.16613e-29		LGALS9	2.2662e-13	0.849452	7.13186e-13		LGALS9	4.10147e-08	0.55366	1.0449e-07
	CD274	1.48148e-06	0.44515	2.99091e-06		PDCD1LG2	7.9621e-17	0.0904254	1.80474e-16		C10orf54	1.39158e-58	-1.72828	3.72247e-57		C10orf54	3.83712e-65	-1.84578	1.36857e-63
	LGALS9	4.20806e-05	0.295792	6.82215e-05		CD274	1.25018e-16	0.068289	2.77213e-16		PVRL3	1.48616e-42	-2.16768	1.59019e-41		PVRL3	1.22297e-58	-2.26188	2.61715e-57
	C10orf54	0.0810172	0.117501	0.0952619		PVRL3	0.00936267	0.0620442	0.0108522		PDCD1LG2	1.35612e-05	-0.525505	2.59116e-05		PDCD1LG2	1.71927e-23	-1.24731	9.19812e-23
	PVRL3	0.308614	0.0941996	0.330218							CD274	0.550083	0.0866962	0.594534		CD274	0.00381777	-0.358454	0.00609704
T cell Co-inhibition	LAG3	1.64769e-24	1.18966	4.40757e-23		CTLA4	1.87262e-69	0.518027	6.36692e-68		TIGIT	3.61159e-31	2.16014	2.57627e-30		TIGIT	3.59172e-09	1.11906	9.60785e-09
	CTLA4	1.6803e-22	1.17886	2.56846e-21		LAG3	1.63141e-65	0.638523	3.32807e-64		LAG3	2.062e-27	1.94724	1.22574e-26		LAG3	1.52128e-06	0.757583	3.39118e-06
	TIGIT	1.77538e-15	1.04108	1.05537e-14		TIGIT	8.18335e-27	0.11868	2.98108e-26		CTLA4	2.90024e-19	1.57794	1.2413e-18		HAVCR2	9.68139e-05	0.363469	0.000188347
	LAIR1	1.47474e-08	0.378367	5.2599e-08		BTLA	1.59963e-22	0.174616	4.40979e-22		HAVCR2	2.09264e-10	0.66664	5.74136e-10		CTLA4	0.0194227	0.39908	0.0273452
	CD274	1.48148e-06	0.44515	2.99091e-06		CD274	1.25018e-16	0.068289	2.77213e-16		BTLA	0.214335	0.225482	0.2466		C10orf54	3.83712e-65	-1.84578	1.36857e-63
	CD244	1.48127e-06	0.437223	3.10777e-06		LAIR1	6.98366e-14	0.134309	1.36987e-13		CD274	0.550083	0.0866962	0.594534		CD160	5.69257e-15	-0.638889	2.10036e-14
	HAVCR2	1.80487e-06	0.303171	3.57632e-06		CD160	2.59955e-05	0.0456865	3.44356e-05		C10orf54	1.39158e-58	-1.72828	3.72247e-57		CD244	1.03373e-14	-0.973588	3.68696e-14
	BTLA	2.98493e-06	0.579622	5.60329e-06		CD244	7.75955e-05	0.0277106	0.000101471		CD160	3.65906e-14	-0.776727	1.18642e-13		LAIR1	8.61573e-11	-0.659663	2.63395e-10
	C10orf54	0.0810172	0.117501	0.0952619							CD244	0.000141422	-0.536365	0.000232803		CD274	0.00381777	-0.358454	0.00609704
	CD160	0.021228	-0.137838	0.0261079							LAIR1	0.0126158	-0.281296	0.0177617		BTLA	0.0394401	-0.35414	0.0520998
Type I IFN Reponse	MX2	1.62517e-15	0.63249	1.0229e-14		ISG20	1.55466e-55	0.686711	2.26536e-54		IRF7	6.22205e-30	1.52429	4.161e-29		IRF7	2.49025e-51	1.70592	3.80652e-50
	ISG20	7.49335e-10	0.485098	3.20715e-09		MX2	4.71173e-43	0.541604	4.80597e-42		ISG20	2.79007e-22	1.2482	1.42161e-21		ISG20	1.44935e-11	0.763104	4.84626e-11
	RSAD2	9.00679e-10	0.646909	3.56936e-09		RSAD2	4.12001e-42	0.523577	3.82038e-41		RSAD2	1.71896e-21	1.5674	8.3604e-21		RSAD2	5.58996e-10	0.92049	1.61656e-09
	MX1	1.97644e-07	0.598697	5.56523e-07		MX1	1.25522e-35	0.769563	7.53133e-35		MX1	3.78814e-17	1.38789	1.39769e-16		MX1	1.11207e-06	0.789194	2.58677e-06
	IFIT3	3.56149e-05	0.399296	5.86276e-05		IFIT2	1.90467e-26	0.464818	6.69919e-26		MX2	4.12927e-09	0.710547	1.07764e-08		IFIT1	0.000796666	0.56471	0.00142072
	IFIT2	9.67129e-05	0.351659	0.000154452		IFIT3	4.56456e-23	0.480505	1.29329e-22		IFIT3	3.4655e-07	0.70991	7.72518e-07		IFIT2	0.00923175	0.314725	0.0143159
	DDX4	0.370444	0.0335313	0.388603		IFIT1	8.28239e-08	0.337889	1.2997e-07		IFIT2	1.92161e-06	0.666384	4.11224e-06		IFIT3	0.0223199	0.310614	0.031016
	IFIT1	0.393791	0.101672	0.409084		IRF7	1.26348e-05	0.151238	1.74155e-05		IFIT1	7.07443e-05	0.666383	0.000120153		MX2	0.477215	0.078057	0.515778
	TNFSF10	0.0115363	-0.223251	0.0154298		TNFSF10	0.00115594	-0.160625	0.00142056		DDX4	0.250638	0.0674511	0.282298		DDX4	0.522558	0.0339198	0.559138
	IRF7	0.0193757	-0.181627	0.0243906		DDX4	0.50262	-0.00410106	0.534034		TNFSF10	3.40359e-05	-0.563821	6.06973e-05		TNFSF10	0.00373149	-0.340571	0.00623858
Type II IFN Reponse	GPR146	3.82043e-08	-0.358332	1.27745e-07		AHR	1.52585e-05	0.0906522	2.04786e-05		GPR146	7.60796e-103	-3.00056	8.14052e-101		GPR146	1.23212e-107	-2.64223	1.31837e-105
	SELP	1.58632e-07	-0.814542	4.71489e-07		SELP	0.0385353	-0.0229344	0.0436733		SELP	1.83947e-40	-3.32896	1.78931e-39		SELP	2.44993e-30	-2.51442	1.74762e-29
	AHR	0.129478	-0.104153	0.147385		GPR146	1.29113e-09	-0.0613447	2.15895e-09		AHR	1.5613e-18	-0.965529	5.9664e-18		AHR	9.62403e-19	-0.861376	4.90367e-18
Cytolytic Activity	PRF1	3.53331e-11	0.729839	1.64376e-10		PRF1	7.12836e-38	0.360138	9.43998e-27		GZMA	0.000519689	0.610294	0.000842526		PRF1	1.5372e-11	-1.03187	4.98426e-11
	GZMA	0.000114511	0.471204	0.000177575		GZMA	2.49882e-27	0.520053	4.54433e-37		PRF1	0.0545871	-0.302031	0.0687156		GZMA	0.412195	0.139089	0.459426
ssGSEA score
immune cell type and functional gene-set	wilcox.test P-value
Comparison	B cells	CD4+ Regulatory T cells	CD8+ T cells	Macrophages	Neutrophils	NK cells	pDCs	MHC Class I	APC Co-stimulation	T cell Co-stimulation	APC Co-inhibition	T cell Co-inhibition	Type I IFN Reponse	Type II IFN Reponse	Cytolytic Activity
TP53-mutated BCs vs.TP53-wildtype BCs (TCGA)	0.385706	7.28e-23	5.97e-05	7.06e-10	0.0346486	0.000249449	0.00248035	2.73e-17	1.52e-22	3.87e-13	3.38e-08	5.59e-15	5.6e-07	9.65138e-08	3.05e-09
TP53-mutated BCs vs.TP53-wildtype BCs (METABRIC)	4.08509e-16	4.59636e-35	4.63903e-26	6.43321e-17	6.69032e-05	1.11823e-10	6.16054e-42	6.47127e-18	7.13782e-47	9.60728e-36	9.19632e-23	5.9676e-49	1.25294e-30	0.0031418	6.44177e-33
TP53-mutated BCs vs. normal tissue	0.727756	8.88e-34	0.000219602	9.86e-15	0.0182648	6.19602e-10	4.99e-21	1.96e-31	2.95e-21	1.03e-23	2.45274e-10	0.00785641	1.88e-20	2.96775e-50	0.00082512
TP53-wildtype BCs vs. normal tissue	0.127783	5.59541e-13	0.332536	4.31605e-07	0.190246	1.0675e-23	1.99051e-22	1.99072e-17	4.39998e-05	2.29713e-10	2.57815e-25	7.89598e-05	8.28601e-10	1.82697e-50	0.159301
Note:
1. Red color indicates that the gene or gene-set has significantly higher expression or enrichment levels in TP53-mutated BCs than in TP53-wildtype BCs or normal tissue, and purple color indicates that the gene or gene-set has significantly lower expression or enrichment levels in TP53-mutated BCs than in TP53-wildtype BCs or normal tissue. It applies to all the supplementary tables.
2. In comparisons of TP53-wildtype BCs vs. normal tissue, red color indicates that the gene or gene-set has significantly higher expression or enrichment levels in TP53-wildtype BCs than in normal tissue, and purple color indicates that the gene or gene-set has significantly lower expression or enrichment levels in TP53-wildtype BCs than in normal tissue. It applies to all the supplementary table…

## Sheet: Table S6
Table S6. Comparison of the enrichment levels of the tumor-infiltrating lymphocytes signature between two classes of samples.
Tumor-infiltrating lymphocytes (TILs) genes
TP53 mutated vs. TP53 wildtype										TP53 mutated vs. normal tissue					TP53 wildtype vs. normal tissue
TCGA					METABRIC					TCGA					TCGA
Gene symbol	P-value	Log2(fold change)	FDR		Gene symbol	P-value	Log2(fold change)	FDR		Gene symbol	P-value	Log2(fold change)	FDR		Gene symbol	P-value	Log2(fold change)	FDR
CD38	6.39857e-23	1.43389	3.83914e-21		CD38	1.13725e-59	0.69108	1.27373e-57		SPNS1	2.08833e-33	0.757817	5.012e-32		GLYR1	6.53117e-28	0.504083	9.79676e-27
ITM2C	4.65551e-23	0.809275	5.58661e-21		ICOS	8.90139e-59	0.488951	4.98478e-57		TIGIT	3.61159e-31	2.16014	7.22318e-30		SPNS1	5.97512e-27	0.639292	7.96683e-26
C1orf38	2.01265e-20	0.666457	8.0506e-19		ITM2C	6.61566e-56	0.727699	2.46985e-54		ICOS	5.94447e-25	1.92274	7.92596e-24		TNFRSF4	3.04363e-15	0.990812	2.80951e-14
ICOS	2.38072e-19	1.1592	5.71373e-18		CCL5	2.69858e-47	0.921448	7.55603e-46		TNFRSF4	3.35331e-23	1.42323	4.02397e-22		TIGIT	3.59172e-09	1.11906	1.65772e-08
F5	6.93136e-18	0.940961	1.38627e-16		TNFRSF4	1.64801e-39	0.368071	3.69153e-38		CD86	7.6376e-17	0.94993	7.6376e-16		CORO1A	1.00576e-07	0.657137	3.89327e-07
TIGIT	1.77538e-15	1.04108	3.04351e-14		PRKCQ	9.39991e-39	0.295217	1.50399e-37		SIRPG	1.57167e-16	1.56017	1.45077e-15		CLEC2D	3.63967e-07	0.313687	1.36488e-06
KLRD1	2.44664e-13	0.768497	3.66995e-12		KLRD1	9.34945e-39	0.295587	1.74523e-37		CORO1A	1.8199e-15	1.02463	1.55991e-14		SELL	8.6036e-07	0.76692	3.12858e-06
IRF4	6.25477e-13	0.953389	8.3397e-12		PLEK	1.06409e-37	0.538101	1.48973e-36		LILRB1	8.42239e-15	0.958598	6.73791e-14		CD86	9.8031e-07	0.512194	3.45992e-06
FCRL5	9.46257e-12	1.13003	1.03228e-10		CD247	2.32741e-37	0.651574	2.89634e-36		F5	3.97233e-14	1.30616	2.97925e-13		LILRB1	6.93078e-06	0.506668	2.24782e-05
PRKCQ	9.33548e-12	0.824778	1.12026e-10		ARHGAP30	8.49154e-37	0.348052	9.51053e-36		TRAF3IP3	7.22528e-13	0.98653	5.1002e-12		CCR7	9.26548e-06	0.770826	2.92594e-05
SIRPG	1.76154e-11	0.869725	1.76154e-10		CD3D	1.08135e-35	0.747866	1.10101e-34		CD6	3.80448e-12	1.04348	2.40283e-11		ICOS	2.51931e-05	0.763534	7.3736e-05
LPXN	2.34844e-11	0.414438	2.16779e-10		CD86	1.92082e-34	0.398933	1.79276e-33		LPXN	3.12507e-10	0.628351	1.63047e-09		GPR18	0.000146064	0.538883	0.000398357
IL2RG	4.14206e-11	0.725627	3.55034e-10		CD2	2.57754e-34	0.693133	2.22065e-33		CCR7	5.45725e-10	1.16145	2.72862e-09		SIRPG	0.000180677	0.690446	0.000471331
CCL5	5.87052e-11	0.741057	4.69642e-10		IL2RG	5.1628e-34	0.173705	4.13024e-33		TCL1A	1.60338e-09	1.47609	7.4002e-09		PARVG	0.000308996	0.381442	0.000772491
LCK	1.52187e-10	0.76869	1.1414e-09		ITK	6.74307e-33	0.415363	5.03483e-32		IL2RG	4.44904e-09	0.903429	1.90673e-08		TCL1A	0.000370355	0.804725	0.000888853
TRAF3IP3	5.07408e-10	0.552736	3.5817e-09		CCR7	3.61633e-32	0.526465	2.53143e-31		FCRL3	8.76634e-09	1.20791	3.50653e-08		TRAF3IP3	0.000476743	0.433794	0.00112175
CD86	1.59219e-09	0.437735	1.06146e-08		CD40	5.9591e-32	0.279353	3.51274e-31		SELL	1.42883e-08	1.02346	5.53096e-08		GZMK	0.00295638	0.61371	0.00645029
MAL	1.69984e-09	0.759822	1.07359e-08		MAL	8.03174e-32	0.461016	4.49778e-31		PAG1	7.9959e-08	0.568978	2.9076e-07		GPSM3	0.00308319	0.288139	0.00660683
LILRB1	9.19102e-09	0.45193	5.51461e-08		CD6	2.82252e-31	0.497838	1.50535e-30		PARVG	7.75673e-08	0.600166	2.90877e-07		FCRL3	0.00376029	0.588611	0.00791639
DOK2	1.16329e-08	0.525715	6.64736e-08		PTPRCAP	6.36003e-31	0.411837	3.23783e-30		CLEC2D	1.68872e-07	0.354162	5.78991e-07		CD6	0.00645015	0.425459	0.0129003
CD6	1.27886e-08	0.618023	6.97562e-08		SLAMF1	8.75787e-31	0.277792	4.2647e-30		LCK	2.15175e-07	0.804679	6.97866e-07		LPXN	0.0102969	0.213914	0.0199295
PAG1	1.43741e-08	0.381973	7.49954e-08		PIK3CD	1.85187e-30	0.265872	8.64207e-30		GPR18	2.60881e-07	0.809915	8.23836e-07		ITGA4	0.0123606	0.284997	0.023176
LAX1	2.33095e-08	0.711013	1.16547e-07		CD3G	2.49226e-30	0.322175	1.11653e-29		CCL5	4.1644e-07	0.815628	1.24932e-06		F5	0.0179879	0.365203	0.0327053
PLEK	2.60099e-08	0.468008	1.24848e-07		IL7R	7.49099e-30	0.609574	3.22689e-29		CD53	1.06594e-06	0.568022	3.04553e-06		TBC1D10C	0.0198425	0.36508	0.0355388
PIK3CD	8.55081e-08	0.398914	3.94653e-07		STAT4	1.47777e-29	0.399563	6.13002e-29		CST7	1.43047e-06	0.678847	3.992e-06		PTPRCAP	0.024241	0.382326	0.0427782
SLAMF1	1.98856e-07	0.642485	8.83803e-07		ACAP1	2.07379e-29	0.396035	8.29517e-29		LCP2	3.11756e-06	0.483148	8.50244e-06		SASH3	0.0364875	0.243709	0.061669
GPR171	2.18583e-07	0.611025	9.04479e-07		CD53	4.26467e-29	0.335264	1.64704e-28		CD2	4.45426e-06	0.776565	1.1878e-05		PAG1	0.0392114	0.187005	0.0653524
XCL1	2.14528e-07	0.543684	9.19405e-07		LPXN	9.41489e-29	0.387319	3.51489e-28		PTPRCAP	5.94666e-06	0.789561	1.5513e-05		MGC29506	0.0563614	0.399775	0.0913968
XCL2	2.44549e-07	0.562688	9.78197e-07		SIRPG	1.99546e-28	0.212079	7.20939e-28		CD27	7.19537e-06	0.813241	1.83711e-05		LAT	0.0584859	0.248753	0.0935774
TBX21	2.83656e-07	0.583016	1.09802e-06		CD79A	1.07484e-27	0.701617	3.76194e-27		IL2RB	9.30806e-06	0.657768	2.32702e-05		SELPLG	0.066272	0.191024	0.10464
CD53	3.32275e-07	0.393508	1.20827e-06		NCF4	2.50992e-27	0.262775	8.51853e-27		KLHL6	1.32106e-05	0.563944	3.23524e-05		2017-09-06	0.0931302	0.125189	0.141464
CD2	3.30622e-07	0.619509	1.23983e-06		STK10	3.59299e-27	0.176723	1.18357e-26		LAT	1.37399e-05	0.548198	3.29757e-05		CD53	0.110122	0.174514	0.165182
KLHL6	3.56669e-07	0.422629	1.25883e-06		P2RY8	7.93379e-27	0.361343	2.53881e-26		SASH3	2.81895e-05	0.515906	6.63282e-05		LCP2	0.15475	0.141087	0.221071
SLAMF6	3.79277e-07	0.635126	1.30038e-06		TIGIT	8.18335e-27	0.11868	2.54593e-26		GLYR1	4.18108e-05	0.203434	9.64864e-05		CD48	0.154281	0.194243	0.223058
CD40	4.54694e-07	0.352782	1.51565e-06		KLHL6	2.14054e-26	0.252645	6.30897e-26		2017-09-06	4.71659e-05	0.329643	0.000106791		CST7	0.167338	0.207866	0.233495
SIT1	5.75993e-07	0.613928	1.86808e-06		CD8A	2.09206e-26	0.540642	6.33273e-26		TBC1D10C	5.50722e-05	0.659121	0.000122383		STK10	0.165754	0.0873152	0.234005
CD79A	7.21294e-07	0.831737	2.21937e-06		CST7	7.70846e-26	0.347501	2.21371e-25		FYB	6.57556e-05	0.51602	0.000143467		CD27	0.20226	0.225435	0.27271
TNFRSF4	7.16913e-07	0.432422	2.26394e-06		TBC1D10C	8.51385e-26	0.423567	2.38388e-25		C1orf38	7.46537e-05	0.450284	0.000159972		KLHL6	0.215402	0.141315	0.287203
CD247	9.47027e-07	0.56884	2.84108e-06		PVRIG	1.01913e-25	0.415352	2.78396e-25		GZMK	9.06792e-05	0.81518	0.000190904		IL2RG	0.248669	0.177801	0.31745
LCP2	1.23237e-06	0.342061	3.60694e-06		SH2D1A	1.37296e-25	0.269662	3.66121e-25		CD3D	0.00011491	0.690367	0.000233716		IL2RB	0.246274	0.176824	0.317773
CD3D	1.82265e-06	0.614372	5.20756e-06		CD3E	2.62154e-25	0.255274	6.82821e-25		CD48	0.000154588	0.523768	0.000304108		NLRC3	0.306807	0.0936984	0.387546
CD27	2.05601e-06	0.587806	5.73769e-06		TRAF3IP3	3.422e-25	0.331275	8.71053e-25		PLEK	0.000153184	0.484533	0.000306368		PAX5	0.337162	0.191095	0.421452
SH2D1A	2.217e-06	0.620527	6.04636e-06		CD27	4.84299e-25	0.395112	1.20537e-24		GPSM3	0.000216541	0.360397	0.000419111		TRAT1	0.342502	0.174955	0.423714
ARHGAP30	3.32715e-06	0.323502	8.67952e-06		CD52	5.43677e-25	0.65621	1.32374e-24		ARHGAP30	0.000273613	0.365354	0.000521168		FYB	0.35236	0.112952	0.431461
FYB	3.27595e-06	0.403067	8.73588e-06		ARHGAP25	5.70325e-25	0.318876	1.35907e-24		SIT1	0.000490254	0.578907	0.000919225		PVRIG	0.357122	0.107288	0.432875
ACAP1	6.72638e-06	0.546846	1.71737e-05		CORO1A	1.63777e-24	0.384455	3.82147e-24		ACAP1	0.00110551	0.545902	0.00201002		CD2	0.361379	0.157057	0.433655
CST7	7.21894e-06	0.470982	1.80474e-05		LCK	7.89305e-24	0.137721	1.76804e-23		SH2D1A	0.00109054	0.603166	0.00201331		CD52	0.448214	0.120711	0.522191
IL2RB	7.77077e-06	0.480945	1.86498e-05		PRKCB	7.83057e-24	0.464541	1.78984e-23		SLAMF6	0.00127173	0.567626	0.00227772		CCL5	0.639209	0.0745711	0.730524
CD3G	7.73637e-06	0.585276	1.89462e-05		SASH3	1.05044e-23	0.304865	2.30684e-23		ITGA4	0.00131101	0.372847	0.00231354		ARHGAP9	0.654724	0.0558148	0.741197
CD3E	1.1239e-05	0.562381	2.64447e-05		F5	2.92996e-23	0.140655	6.31068e-23		TRAT1	0.00188793	0.610963	0.00328335		CD3D	0.676596	0.0759954	0.751773
CORO1A	1.60649e-05	0.36749	3.63735e-05		FCRL5	9.56434e-23	0.15904	2.02114e-22		CD38	0.00227669	0.64267	0.0039029		ARHGAP30	0.67542	0.0418524	0.75748
FCRL3	1.58193e-05	0.619296	3.6506e-05		CD48	2.24802e-22	0.452275	4.66255e-22		PAX5	0.00251196	0.643243	0.00418659		LCK	0.836208	0.0359893	0.888008
ITK	1.91176e-05	0.549667	4.24835e-05		DOK2	2.36421e-22	0.143132	4.81439e-22		CD52	0.0038934	0.445454	0.0064001		EVI2B	0.832361	0.0247846	0.891816
TCL1A	3.23267e-05	0.671369	7.05309e-05		PLAC8	6.59901e-22	0.403649	1.3198e-21		SELPLG	0.00738035	0.289679	0.0118086		PLEK	0.891294	0.0165245	0.922029
CYBB	3.3509e-05	0.366539	7.1805e-05		DOCK2	5.02819e-21	0.350931	9.87995e-21		CD3E	0.00737019	0.462176	0.0119517		NCKAP1L	0.982514	0.00252525	0.99077
CSF2RB	3.50852e-05	0.364246	7.38635e-05		SELL	9.86113e-21	0.372738	1.90422e-20		NCKAP1L	0.0110149	0.316403	0.0171662		DOCK11	8.67866e-58	-2.15114	1.04144e-55
NCF4	6.20682e-05	0.280946	0.00012624		LY9	1.10627e-20	0.202825	2.10003e-20		ARHGAP9	0.0207983	0.302238	0.0315924		GIMAP6	7.54319e-55	-1.65313	4.52592e-53
IKZF1	6.11195e-05	0.354692	0.000126454		NCKAP1L	5.14832e-20	0.209224	9.61019e-20		MGC29506	0.0270381	0.561431	0.0405571		GIMAP7	3.43217e-44	-1.69916	1.37287e-42
DOCK2	7.7615e-05	0.338512	0.00015523		PAG1	1.38862e-19	0.194048	2.54959e-19		GPR171	0.038097	0.348642	0.0564401		GIMAP5	5.53094e-44	-1.67982	1.65928e-42
PTPRC	8.16982e-05	0.406896	0.000158126		LAT	2.01254e-19	0.185265	3.63555e-19		CD79A	0.0389924	0.517416	0.0570621		MFNG	7.49443e-30	-1.18999	1.79866e-28
CCR2	8.06416e-05	0.454454	0.000158639		LCP2	4.16432e-19	0.0929634	7.40323e-19		CD8A	0.0435858	0.339115	0.0622654		CFH	1.01629e-29	-1.37028	2.03259e-28
PLAC8	9.08061e-05	0.504051	0.000172964		IL10RA	5.26348e-19	0.275274	9.2111e-19		PTPRC	0.0540406	0.288981	0.0762926		GIMAP4	2.36326e-28	-1.07754	4.05131e-27
NCKAP1L	0.000116641	0.313877	0.000218702		ARHGAP9	8.49668e-19	0.338954	1.46404e-18		SLAMF1	0.0560735	0.343358	0.0782421		CD40	2.77356e-18	-0.855503	3.32827e-17
IL7R	0.000138144	0.552761	0.000255036		HCST	1.05626e-18	0.417127	1.79244e-18		EVI2B	0.0570499	0.236799	0.0786895		ARHGAP25	5.62303e-18	-0.863413	6.13422e-17
2017-09-06	0.000168244	0.204455	0.000305898		2017-09-06	3.78307e-18	0.222132	6.32394e-18		STK10	0.0752993	0.131313	0.101527		GVIN1	1.42747e-15	-1.22031	1.42747e-14
CD28	0.000177995	0.352166	0.000318797		GVIN1	6.12478e-18	0.405595	1.00879e-17		MS4A1	0.0751274	0.498397	0.102446		IRF4	3.62428e-15	-1.45003	3.10653e-14
STAT4	0.000370861	0.38345	0.00065446		TCL1A	9.94127e-18	0.222783	1.61366e-17		HCLS1	0.0840147	0.187758	0.110789		MPEG1	8.09106e-15	-0.941523	6.47285e-14
CD8A	0.000531668	0.39094	0.000924641		GIMAP5	2.45912e-17	0.329044	3.9346e-17		ITK	0.0915538	0.306654	0.119418		STAT4	5.21625e-14	-1.16221	3.91218e-13
LY9	0.000545232	0.434927	0.000934684		MZB1	1.06753e-16	0.541018	1.68399e-16		P2RY8	0.10733	0.192215	0.137017		FAM65B	1.06371e-13	-1.11875	7.09143e-13
CD48	0.000624261	0.329525	0.00105509		CYBB	2.35944e-16	0.293622	3.67025e-16		IKZF1	0.107005	0.200929	0.138071		INPP5D	1.01901e-13	-0.765849	7.19302e-13
HCST	0.000681445	0.297444	0.00113574		DOCK11	4.34891e-16	0.229083	6.67231e-16		DOCK2	0.127878	0.189327	0.16153		ITM2C	1.50366e-13	-0.808872	9.49681e-13
PTPRCAP	0.000705663	0.407235	0.00115999		VAMP5	8.74611e-16	0.27532	1.32374e-15		HCST	0.129934	0.188057	0.162418		VAMP5	7.30826e-13	-0.654498	4.38495e-12
ARHGAP25	0.00089863	0.234885	0.00143781		PTPRC	1.27304e-15	0.163697	1.90108e-15		CD3G	0.150023	0.271053	0.183702		IL16	5.94253e-12	-0.738879	3.39573e-11
SASH3	0.00089473	0.272197	0.00145091		GZMK	8.26291e-15	0.481198	1.21769e-14		NLRC3	0.162756	0.152067	0.19728		IFFO1	3.91811e-11	-0.621661	2.13715e-10
LAT	0.000983477	0.299444	0.00155286		HCLS1	5.76434e-14	0.306797	8.38449e-14		FCRL5	0.189118	0.334737	0.224695		KLRD1	9.50817e-11	-0.944201	4.96078e-10
TRAT1	0.00102112	0.436008	0.00159136		IRF4	7.15066e-14	0.11832	1.02676e-13		PVRIG	0.256849	0.136104	0.296364		CFHR1	1.70508e-10	-0.698686	8.52539e-10
IL10RA	0.00112786	0.267227	0.00173516		TRAT1	1.39741e-13	0.154728	1.98114e-13		XCL2	0.390187	0.137805	0.437593		MAL	2.33969e-09	-1.03708	1.12305e-08
PAX5	0.00151615	0.452148	0.00230302		INPP5D	1.87267e-12	0.167474	2.62174e-12		CD247	0.409154	0.132176	0.450445		PIK3CD	5.51162e-09	-0.613953	2.44961e-08
CCR7	0.00168175	0.390624	0.00252263		EVI2B	2.66904e-12	0.289268	3.69053e-12		LAX1	0.437583	0.15055	0.468839		PRKCQ	6.05242e-09	-0.978011	2.59389e-08
DOCK11	0.00250845	0.242259	0.00371623		FCRL3	7.77126e-12	0.0903457	1.04865e-11		LY9	0.66004	0.078615	0.6828		KLRK1	9.03637e-09	-0.953288	3.73919e-08
PARVG	0.00283394	0.218723	0.00414723		GPR18	7.74405e-12	0.167139	1.05772e-11		CYBB	0.689518	0.0544371	0.707198		XCL1	2.52777e-08	-0.81894	1.01111e-07
SPNS1	0.00295106	0.118524	0.00426659		GIMAP4	2.5153e-10	0.247214	3.35374e-10		CD28	0.829838	0.0302151	0.843903		IL7R	1.60176e-06	-1.0168	5.49174e-06
CD52	0.00301814	0.324743	0.00431162		GPSM3	1.20217e-09	0.178341	1.58404e-09		ITM2C	0.997358	0.000403526	0.997358		MS4A6A	2.82962e-06	-0.470669	9.43208e-06
HCLS1	0.00402457	0.209847	0.00568174		CCR2	1.32982e-09	0.0916375	1.73186e-09		GIMAP6	1.60969e-53	-1.84402	1.93163e-51		DOK2	1.01755e-05	-0.601686	3.13092e-05
ARHGAP9	0.00551086	0.246423	0.00768958		LILRB1	4.54537e-09	0.0457657	5.85152e-09		GIMAP7	1.42941e-38	-1.79983	8.57643e-37		CSF2RB	1.82146e-05	-0.525017	5.46437e-05
PRKCB	0.00606615	0.320611	0.00827202		CD28	1.18286e-08	0.0600544	1.50546e-08		DOCK11	1.07988e-37	-1.90888	4.31953e-36		CD38	5.7592e-05	-0.791218	0.000164549
MS4A1	0.00631134	0.52165	0.00850968		ARHGAP15	1.25933e-08	0.206469	1.58477e-08		GIMAP5	1.69614e-35	-1.61276	5.08843e-34		PLAC8	0.000119393	-0.698061	0.000333189
GPR18	0.00759744	0.271031	0.0101299		PARVG	8.51848e-08	0.14924	1.06008e-07		MFNG	7.45081e-31	-1.29442	1.27728e-29		TBX21	0.000177126	-0.594669	0.000472337
TBC1D10C	0.00798743	0.294041	0.0105329		TARP	6.09761e-07	0.139598	7.50476e-07		CFH	3.59774e-27	-1.40513	5.39661e-26		CCR2	0.000235007	-0.589501	0.000600019
GVIN1	0.00894545	0.282274	0.011668		CSF2RB	1.26036e-06	0.0338072	1.53435e-06		GIMAP4	7.34035e-22	-1.03318	8.00766e-21		NCF4	0.00033214	-0.369827	0.000813404
P2RY8	0.01049	0.213792	0.0135355		GIMAP7	4.88683e-06	0.207145	5.88521e-06		IL16	1.25912e-12	-0.809705	8.39414e-12		FCRL5	0.000584647	-0.79529	0.00134919
EVI2B	0.0111658	0.212014	0.0142542		KLRK1	8.59433e-06	0.0325844	1.02401e-05		IFFO1	1.39703e-11	-0.661496	8.38216e-11		PRKCB	0.000747565	-0.550216	0.0016926
VAMP5	0.0128863	0.153536	0.0162774		SELPLG	1.38233e-05	0.0405783	1.6297e-05		INPP5D	5.27823e-11	-0.683393	3.01613e-10		LAX1	0.00109654	-0.560463	0.00243675
KLRK1	0.0202543	0.274718	0.0253179		SPNS1	1.8972e-05	0.0982918	2.2134e-05		FAM65B	2.12479e-10	-0.99412	1.15898e-09		XCL2	0.00500243	-0.424883	0.0103499
SELL	0.0240416	0.256545	0.0297422		ITGA4	2.65944e-05	0.0541027	3.0707e-05		ARHGAP25	1.09017e-09	-0.628528	5.23282e-09		IL10RA	0.00585719	-0.327086	0.0119129
MPEG1	0.0475205	0.162012	0.0581884		MS4A6A	0.000142426	0.177391	0.000162772		MPEG1	2.0089e-09	-0.779511	8.92843e-09		CD247	0.00751228	-0.436664	0.0147783
MS4A6A	0.085526	0.12014	0.103668		MPEG1	0.000211892	0.0588517	0.000239716		GVIN1	8.32526e-09	-0.938039	3.44493e-08		CYBB	0.0116427	-0.312101	0.0221767
ARHGAP15	0.117154	0.131085	0.140585		XCL1	0.00188821	0.0238031	0.0021148		CFHR1	1.55573e-07	-0.689616	5.4908e-07		CD28	0.0179488	-0.321951	0.0331362
GZMK	0.166052	0.20147	0.195355		MS4A1	0.00548126	0.0273046	0.00607823		VAMP5	2.08773e-07	-0.500962	6.9591e-07		ARHGAP15	0.0263495	-0.253401	0.0458251
SELPLG	0.176748	0.098655	0.20592		BC169297	0.0115835	0.0156895	0.0127192		STAT4	3.01953e-07	-0.778756	9.29086e-07		C1orf38	0.0321926	-0.216173	0.0551874
TARP	0.2156	0.188873	0.248769		IFFO1	0.012935	0.0688711	0.0140652		CD40	1.00557e-06	-0.502721	2.94313e-06		LY9	0.0472987	-0.356312	0.0777514
FAM65B	0.239657	0.124632	0.271309		SIT1	0.0740991	0.0183146	0.0797991		KLRK1	0.000103393	-0.67857	0.000213917		SLAMF1	0.0838972	-0.299126	0.130749
INPP5D	0.246127	0.0824551	0.27603		IL16	0.239843	0.0196941	0.25342		MS4A6A	0.0023743	-0.350529	0.00401291		CD3G	0.0879266	-0.314223	0.135272
ITGA4	0.261934	0.0878503	0.291037		GIMAP6	0.313032	0.0333408	0.32766		IRF4	0.0108461	-0.496637	0.0171254		GPR171	0.110276	-0.262383	0.163372
MGC29506	0.280049	0.161656	0.308311		GPR171	0.427339	0.00502237	0.435109		IL7R	0.0205302	-0.464035	0.0315849		TARP	0.1254	-0.323726	0.183513
GPSM3	0.284214	0.0722573	0.310052		FYB	0.484041	0.00561516	0.488402		PIK3CD	0.0401833	-0.215039	0.0580963		ITK	0.175144	-0.243013	0.241578
STK10	0.333541	0.0439973	0.360585		CFHR1	0.510991	0.00551026	0.510991		XCL1	0.0818062	-0.275257	0.109075		CD79A	0.185547	-0.31432	0.253019
CLEC2D	0.346193	0.0404747	0.370921		GLYR1	5.70549e-32	-0.234585	3.55008e-31		MAL	0.13247	-0.277257	0.163881		DOCK2	0.222187	-0.149185	0.289809
NLRC3	0.395113	0.0583691	0.415908		CLEC2D	0.17431	-0.0382451	0.185931		PRKCB	0.171733	-0.229606	0.20608		IKZF1	0.219921	-0.153763	0.290005
GIMAP5	0.409371	0.067061	0.42717		TBX21	0.369709	-0.0122247	0.383402		CSF2RB	0.232985	-0.160771	0.2741		HCST	0.391712	-0.109387	0.465401
GIMAP4	0.506415	0.0443591	0.523878		CFH	0.412017	-0.0318038	0.423357		KLRD1	0.250782	-0.175704	0.292173		PTPRC	0.413088	-0.117915	0.485986
PVRIG	0.726921	0.0288164	0.733029							PLAC8	0.285988	-0.19401	0.326843		CD3E	0.584027	-0.100205	0.673877
CFHR1	0.897468	0.00907009	0.897468							ARHGAP15	0.333292	-0.122316	0.377312		SLAMF6	0.699562	-0.0675	0.77016
GLYR1	2.35833e-19	-0.300649	7.075e-18							PRKCQ	0.395866	-0.153233	0.439851		CD8A	0.745789	-0.0518242	0.813588
GIMAP6	0.00552032	-0.190891	0.00761423							NCF4	0.420584	-0.0888803	0.458819		SIT1	0.840976	-0.0350202	0.885238
MFNG	0.134559	-0.104429	0.159872							CCR2	0.431318	-0.135048	0.466289		P2RY8	0.853024	-0.0215762	0.890112
GIMAP7	0.221332	-0.100675	0.252951							TARP	0.565842	-0.134853	0.600894		HCLS1	0.830315	-0.0220882	0.897638
IL16	0.34779	-0.0708259	0.369335							DOK2	0.573894	-0.075971	0.604099		MS4A1	0.930716	-0.0232524	0.946491
IFFO1	0.5378	-0.0398352	0.55159							IL10RA	0.624176	-0.059859	0.651314		SH2D1A	0.924669	-0.017361	0.948378
CFH	0.656299	-0.0348494	0.667423							TBX21	0.94174	-0.0116528	0.949654		ACAP1	0.995636	-0.00094384	0.995636
Immune cell infiltration genes
TP53 mutated vs. TP53 wildtype										TP53 mutated vs. normal tissue					TP53 wildtype vs. normal tissue
TCGA					METABRIC					TCGA					TCGA
Gene symbol	P-value	Log2(fold change)	FDR		Gene symbol	P-value	Log2(fold change)	FDR		Gene symbol	P-value	Log2(fold change)	FDR		Gene symbol	P-value	Log2(fold change)	FDR
FOXP3	1.69335e-19	0.869307	1.35468e-18		CD247	2.32741e-37	0.651574	3.25838e-36		FOXP3	4.97483e-63	2.7455	7.95972e-62		FOXP3	6.47074e-38	1.8762	5.17659e-37
B3GAT1	9.99544e-14	1.0613	5.3309e-13		CD8A	2.09206e-26	0.540642	1.46444e-25		CXCR5	5.48725e-15	1.54532	2.1949e-14		CD1A	9.06765e-09	1.25681	2.0726e-08
CSF2	2.22437e-11	0.363672	8.89749e-11		CXCR5	5.19079e-17	0.294325	2.42237e-16		CD1A	3.54329e-13	1.70691	9.44876e-13		CXCR5	2.61483e-08	1.0425	5.22965e-08
CD68	1.10702e-07	0.342993	3.54246e-07		PTPRC	1.27304e-15	0.163697	4.45565e-15		CD68	5.20149e-05	0.440361	8.32238e-05		CD68	0.315506	0.0973679	0.388315
CD247	9.47027e-07	0.56884	2.52541e-06		CSF2	9.77346e-12	0.0512685	2.73657e-11		CSF2	0.0119964	0.261101	0.0174493		B3GAT1	1.72646e-35	-2.56784	9.20776e-35
PTPRC	8.16982e-05	0.406896	0.000186739		CD68	3.01896e-11	0.214509	7.04425e-11		CD8A	0.0435858	0.339115	0.0581144		IL3RA	1.50434e-16	-0.803997	6.01737e-16
CXCR5	0.000114851	0.502825	0.000229702		PDPN	2.58896e-08	0.203241	5.17792e-08		PTPRC	0.0540406	0.288981	0.0665115		ENG	2.09525e-13	-0.559046	6.70479e-13
CD8A	0.000531668	0.39094	0.000945188		IL3RA	6.56098e-06	0.0405178	1.14817e-05		MS4A1	0.0751274	0.498397	0.0858599		PDPN	7.31739e-10	-0.778602	1.9513e-09
IL17A	0.00156768	0.0817799	0.00250828		MS4A1	0.00548126	0.0273046	0.0085264		CD247	0.409154	0.132176	0.436431		CD247	0.00751228	-0.436664	0.0133552
CD1A	0.00386928	0.450103	0.00562804		B3GAT1	0.148369	0.0214771	0.207716		IL17A	0.957925	0.00275858	0.957925		IL17A	0.0232558	-0.0790213	0.0372093
MS4A1	0.00631134	0.52165	0.00841512		FOXP3	0.81548	0.00199827	0.87821		IL3RA	1.41077e-18	-0.900381	7.52412e-18		CSF2	0.141885	-0.102571	0.18918
PDPN	0.37163	0.0788159	0.37163		TPSAB1	2.08e-19	-0.608678	1.38e-18		ENG	3.10831e-14	-0.610854	9.94659e-14		PTPRC	0.413088	-0.117915	0.472101
TPSAB1	7.38711e-19	-1.222	5.70812e-18		IL17A	0.65965	-0.00243415	0.839555		B3GAT1	2.6469e-10	-1.50653	6.05006e-10		CD8A	0.745789	-0.0518242	0.795508
IL3RA	0.143719	-0.0963841	0.164251		ENG	0.933677	-0.00214079	0.933677		PDPN	1.24401e-07	-0.699786	2.48803e-07		MS4A1	0.930716	-0.0232524	0.930716
ENG	0.300518	-0.0518084	0.320552
ssGSEA score
TILs gene-set
Comparison	wilcox.test P-value
TP53-mutated BCs vs.TP53-wildtype BCs (TCGA)	2.84e-08
TP53-mutated BCs vs.TP53-wildtype BCs (METABRIC)	4.21542e-33
TP53-mutated BCs vs. normal tissue	0.00148318
TP53-wildtype BCs vs. normal tissue	0.180006
Immune cell infiltration gene-set
Comparison	wilcox.test P-value
TP53-mutated BCs vs.TP53-wildtype BCs (TCGA)	0.000420529
TP53-mutated BCs vs.TP53-wildtype BCs (METABRIC)	1.52291e-32
TP53-mutated BCs vs. normal tissue	0.012078
TP53-wildtype BCs vs. normal tissue	0.589191

## Sheet: Table S7
Table S7. Comparison of the enrichment levels of the cytokine and cytokine receptor signature between two classes of samples.
Cytokine and cytokine receptor (CCR) genes
TP53 mutated vs. TP53 wildtype										TP53 mutated vs. normal tissue					TP53 wildtype vs. normal tissue
TCGA					METABRIC					TCGA					TCGA
Gene symbol	P-value	Log2(fold change)	FDR		Gene symbol	P-value	Log2(fold change)	FDR		Gene symbol	P-value	Log2(fold change)	FDR		Gene symbol	P-value	Log2(fold change)	FDR
IL12RB2	1.87883e-46	2.26974	4.90374e-44		CXCL10	3.19467e-85	1.39053	3.70582e-83		CCL11	1.4945e-68	3.43508	4.87579e-67		BMP8A	9.18371e-94	2.47327	2.39695e-91
CCL7	8.90991e-38	1.70588	1.16274e-35		TNFRSF21	1.87335e-71	0.795671	1.44872e-69		IL4I1	2.68012e-67	2.84638	7.77236e-66		CCL11	4.54454e-76	3.08366	1.48265e-74
IL22RA2	1.28734e-33	1.6099	1.11998e-31		CXCL9	5.86718e-67	1.39913	2.72237e-65		CXCL10	3.98409e-65	3.81727	8.6654e-64		ILDR1	2.67613e-46	1.69987	2.79388e-45
IL2RA	9.01021e-31	1.36575	4.70333e-29		IL2RA	4.00968e-62	0.254838	1.32892e-60		BMP8A	7.74519e-64	2.39742	1.44392e-62		TNFSF4	3.09414e-45	1.74628	3.10604e-44
CCL18	2.10092e-30	1.91077	7.83344e-29		IL1F7	7.30424e-62	0.363156	2.11823e-60		CXCL11	5.64399e-63	3.93156	9.82054e-62		TNFRSF18	3.64817e-43	2.45882	3.17391e-42
IL4I1	1.84009e-30	1.11654	8.00441e-29		CCL8	3.29983e-60	0.967613	8.50624e-59		IL21R	1.47394e-59	2.91745	2.40437e-58		ILF2	7.36469e-41	0.687851	5.65348e-40
ILF2	4.53411e-30	0.455562	1.31489e-28		IL21R	3.09987e-55	0.38624	6.53791e-54		TNFRSF9	4.18857e-51	2.77213	6.07343e-50		IL21R	1.11109e-39	2.15043	7.83771e-39
TNFRSF21	9.30526e-30	0.874652	2.42867e-28		IL32	2.86594e-55	0.591493	6.64897e-54		ILF2	8.16975e-51	1.14341	1.12227e-49		CXCL10	1.64812e-35	2.3562	1.04917e-34
CXCL10	4.57259e-29	1.46107	1.08495e-27		TNFSF13B	3.08791e-51	0.631946	5.96997e-50		CCR8	9.75404e-49	2.67673	1.21229e-47		CXCL11	1.05905e-34	2.50004	6.42818e-34
IL20RB	9.15014e-28	0.932053	1.83707e-26		IL18BP	2.93221e-49	0.56945	5.23286e-48		TNFSF4	9.4562e-45	1.79267	1.02836e-43		IL4I1	1.28774e-33	1.72984	7.63864e-33
IFNAR2	1.16586e-25	0.51244	1.9018e-24		TNFAIP3	4.94937e-48	0.456229	7.65502e-47		CXCL9	3.17406e-33	2.99388	2.30119e-32		IL9R	1.87633e-32	1.46775	1.08827e-31
CCL20	1.87058e-25	1.32412	2.87189e-24		CCL20	6.52544e-48	0.352203	9.46188e-47		TNFRSF18	4.34374e-32	2.23796	2.90697e-31		CCR8	3.41248e-28	1.79881	1.74639e-27
CXCL11	7.91995e-25	1.43152	1.14839e-23		CX3CL1	1.87237e-47	0.767108	2.55524e-46		IL27	3.21846e-30	1.25426	2.00004e-29		TNFRSF9	2.43443e-25	1.73193	1.17664e-24
IL8	9.27218e-25	1.41539	1.2737e-23		CCL5	2.69858e-47	0.921448	3.47817e-46		CCL7	6.06218e-30	2.63241	3.6796e-29		IL11	1.15708e-24	1.25116	5.49087e-24
CCL8	6.46918e-24	1.21751	8.44228e-23		CCL13	1.52824e-45	0.539403	1.86606e-44		CXCR4	5.10257e-29	1.33043	2.95949e-28		TGFB1	9.33917e-22	0.770282	3.86909e-21
CXCL5	1.53696e-23	1.48493	1.91022e-22		IL8	3.63555e-44	0.795068	4.21723e-43		CXCR2P1	8.73133e-29	2.62904	4.95408e-28		IL17REL	3.27924e-21	1.56968	1.27744e-20
IL1R2	5.43237e-21	1.15634	6.16456e-20		IFNAR2	5.81218e-44	0.342081	6.42108e-43		IL9R	3.18586e-26	1.44964	1.69696e-25		ILF3	3.61673e-19	0.29892	1.32953e-18
CCL13	2.40698e-20	1.28134	2.41624e-19		CXCR6	1.89121e-40	0.323206	1.99436e-39		IL11	1.2161e-25	1.49477	6.22357e-25		IL20	5.07459e-19	2.457	1.81434e-18
TNFRSF9	1.61675e-19	1.04019	1.50704e-18		TNFRSF4	1.64801e-39	0.368071	1.66234e-38		TNFRSF4	3.35331e-23	1.42323	1.5913e-22		BMPR1B	5.59371e-19	3.13495	1.97292e-18
IL1F5	2.05154e-19	0.970364	1.84638e-18		IL1RAP	1.70703e-38	0.151563	1.65012e-37		IL18	5.24107e-23	1.18037	2.44271e-22		TGFB3	1.2073e-18	0.856683	4.20139e-18
TNFSF13B	1.45061e-18	0.73379	1.22132e-17		TNFRSF9	1.90062e-38	0.190824	1.76377e-37		ILF3	5.60068e-23	0.478027	2.56452e-22		ILDR2	1.87878e-16	0.892234	6.05386e-16
CXCL1	3.16641e-18	1.30801	2.58261e-17		BMP7	3.62933e-38	0.380362	3.23848e-37		CCL20	1.04737e-22	2.14829	4.71318e-22		TNFRSF12A	8.0022e-16	1.01939	2.51635e-15
IL12A	1.07845e-16	0.916054	7.81875e-16		IL1R2	9.38701e-38	0.290015	8.06587e-37		TNFRSF12A	3.66879e-22	1.39237	1.62297e-21		TNFRSF4	3.04363e-15	0.990812	9.34574e-15
IFNG	2.46967e-16	0.964253	1.74212e-15		IL20RB	4.30347e-37	0.220384	3.56574e-36		CXCL13	5.40334e-21	3.03959	2.31192e-20		CXCL9	4.86787e-15	1.76798	1.47734e-14
TNFSF12-TNFSF13	2.84445e-16	1.3691	1.95369e-15		IL18RAP	2.40566e-36	0.268633	1.86038e-35		IL12B	8.7827e-21	1.41626	3.69723e-20		TNFAIP8L1	9.35472e-15	0.559663	2.80642e-14
TGFA	4.71853e-16	0.863635	3.15779e-15		TGFA	8.47661e-35	0.318485	6.14555e-34		TNFSF13B	9.80503e-17	1.12633	3.60439e-16		CXCR4	1.05617e-14	0.829173	3.13251e-14
IL32	5.03202e-16	0.767755	3.28339e-15		IL15RA	4.33808e-34	0.198743	3.0498e-33		CCR4	2.15117e-16	1.5319	7.79798e-16		IL24	2.90193e-14	1.23783	8.41558e-14
CCR1	7.80168e-16	0.639534	4.96644e-15		IL2RG	5.1628e-34	0.173705	3.52285e-33		IL2RA	3.73257e-16	1.45153	1.33452e-15		IL27	1.48451e-13	0.708928	4.21149e-13
IL27	1.52498e-15	0.54533	9.47669e-15		IFNG	1.13226e-33	0.286551	7.50527e-33		IL32	4.07142e-16	1.17356	1.436e-15		IL19	7.39007e-13	1.35033	2.05192e-12
CCR8	1.01357e-14	0.877921	6.15211e-14		CXCL11	1.30741e-33	0.423214	8.42556e-33		CXCR5	5.48725e-15	1.54532	1.83612e-14		CCR4	1.0781e-12	1.22456	2.96195e-12
CXCL9	1.96196e-14	1.2259	1.1638e-13		IL34	6.66321e-33	0.237754	4.17801e-32		CXCR3	9.1248e-15	1.38155	3.01465e-14		IL12B	4.05815e-12	1.00486	1.08079e-11
IL1RL2	6.43185e-14	0.8651	3.64938e-13		CCR7	3.61633e-32	0.526465	2.20787e-31		IL17REL	8.64061e-14	1.40821	2.7842e-13		IL18	6.65067e-12	0.814992	1.73582e-11
CXCR2P1	1.00516e-13	1.19478	5.58185e-13		CXCL17	7.39608e-32	0.437226	4.39972e-31		IFNB1	9.2435e-14	0.747857	2.94214e-13		CXCR2P1	3.49601e-10	1.43427	8.69008e-10
IL1F9	1.23992e-13	0.48317	6.74206e-13		CXCL13	2.63085e-31	0.737888	1.5259e-30		CCL17	3.57683e-13	1.30959	1.0983e-12		CXCL13	2.47668e-09	1.8865	5.9853e-09
IL15RA	4.45463e-13	0.508144	2.37277e-12		CXCR3	2.01254e-30	0.352937	1.1388e-29		IL29	3.64599e-13	0.999604	1.10651e-12		TNFAIP6	4.80762e-09	0.723064	1.13044e-08
IL34	5.27102e-13	0.858939	2.75147e-12		IL7R	7.49099e-30	0.609574	4.13788e-29		CCL25	9.0225e-12	0.820282	2.61652e-11		IFNB1	7.46111e-09	0.418165	1.73871e-08
IL21R	1.3168e-12	0.767021	6.73892e-12		ILF2	6.86393e-29	0.300949	3.70333e-28		ILDR2	1.2071e-11	0.840816	3.46212e-11		CCL7	8.29363e-09	0.926539	1.91561e-08
CXCL6	1.35986e-12	0.834468	6.82543e-12		CCL7	6.72372e-28	0.185927	3.54523e-27		IL1F5	2.57268e-11	1.32936	7.22011e-11		CXCR5	2.61483e-08	1.0425	5.73504e-08
IL10RB	1.5169e-12	0.228625	7.47e-12		CCR1	3.72097e-27	0.174733	1.87666e-26		TGFB1	6.79175e-11	0.591521	1.86595e-10		IL17C	3.53912e-08	0.474942	7.57139e-08
ILF3	2.45888e-12	0.179107	1.18846e-11		IL15	4.62001e-26	0.234592	2.23301e-25		IFNG	1.89443e-10	1.23326	5.15049e-10		CSF3R	1.81696e-07	0.713699	3.73406e-07
TNFSF9	2.63897e-12	0.613647	1.25231e-11		TNFRSF1B	3.37449e-24	0.240721	1.53506e-23		IL19	2.01841e-10	1.07877	5.43099e-10		CCL20	5.75329e-07	0.824166	1.17313e-06
TNFRSF13C	3.57299e-12	0.691252	1.66527e-11		CCL2	1.692e-23	0.529743	7.54891e-23		ILKAP	2.46895e-10	0.301375	6.57546e-10		IL29	1.2189e-06	0.495441	2.39198e-06
CCL25	3.73105e-12	0.485054	1.70843e-11		CCL18	6.52997e-23	0.181457	2.8584e-22		ILDR1	2.79724e-10	1.07617	7.22851e-10		TNFRSF6B	1.32446e-06	0.613818	2.57974e-06
CXCR4	4.22233e-12	0.501254	1.90005e-11		CCL4	8.03871e-23	0.437649	3.45367e-22		EPO	4.1316e-10	1.37842	1.0572e-09		CXCR3	1.33525e-06	0.834473	2.58148e-06
TGFBI	9.92315e-12	0.505718	4.31657e-11		TNF	1.89379e-22	0.232705	7.98836e-22		CCR7	5.45725e-10	1.16145	1.38286e-09		EPO	1.85945e-06	0.8025	3.49148e-06
CCL4	1.09244e-11	0.604466	4.6742e-11		IL23A	3.67766e-21	0.109151	1.49687e-20		IL17C	8.13151e-10	0.678491	2.0407e-09		ILKAP	1.94642e-06	0.196123	3.62869e-06
IL18BP	1.39415e-11	0.42204	5.86892e-11		TNFRSF17	3.88346e-20	0.401714	1.55338e-19		IL23A	9.37616e-10	0.841908	2.33064e-09		IL28A	4.98699e-06	0.302305	8.97659e-06
IL23A	2.06482e-11	0.525604	8.55423e-11		IL10RA	5.26348e-19	0.275274	2.06971e-18		CCR5	1.07042e-09	0.895353	2.63565e-09		IL1RN	5.78435e-06	0.668525	1.02702e-05
CSF2	2.22437e-11	0.363672	9.07127e-11		TNFAIP8	9.03015e-19	0.222918	3.49166e-18		IL2RG	4.44904e-09	0.903429	1.05564e-08		CCL17	7.66795e-06	0.784283	1.35225e-05
IL2RG	4.14206e-11	0.725627	1.6632e-10		IL12A	1.50082e-18	0.155888	5.70803e-18		IL31RA	6.66176e-09	0.629112	1.56641e-08		CCR7	9.26548e-06	0.770826	1.62301e-05
IL1A	4.80005e-11	0.517487	1.8982e-10		TNFRSF13C	4.68906e-18	0.101965	1.75461e-17		TNFAIP6	8.4958e-09	0.724413	1.97983e-08		IL28B	5.99905e-05	0.214976	0.000101672
IL10	5.32951e-11	0.517038	2.07612e-10		TNFSF14	1.34749e-17	0.129993	4.96217e-17		IL28A	1.04358e-08	0.508414	2.41038e-08		TNFSF11	6.30264e-05	0.773938	0.000106128
CCL5	5.87052e-11	0.741057	2.25324e-10		CCL22	1.50791e-17	0.24219	5.46617e-17		IL12RB1	2.11962e-08	0.851636	4.81062e-08		IL17RB	0.000114024	0.520512	0.000187171
CX3CL1	6.27319e-11	0.693529	2.3729e-10		EPO	1.56962e-17	0.190164	5.60232e-17		BMP1	2.11508e-08	0.566553	4.84241e-08		CCR3	0.000216668	0.394549	0.000346935
CXCL3	1.02886e-10	0.659936	3.83619e-10		TNFRSF12A	1.9905e-17	0.354915	6.99691e-17		TNFRSF6B	1.41572e-07	0.704374	3.13138e-07		CCL1	0.000242747	0.191797	0.000383982
TNFAIP3	3.41992e-10	0.447616	1.25718e-09		CXCR5	5.19079e-17	0.294325	1.79741e-16		TNFAIP8L1	2.03072e-07	0.382804	4.45393e-07		CCL25	0.000254717	0.335228	0.000400489
CXCL16	4.44362e-10	0.366789	1.58875e-09		IL29	5.34059e-17	0.0898427	1.82208e-16		IL28B	2.92563e-07	0.364074	6.31066e-07		BMP1	0.000319869	0.329638	0.000496939
CXCR6	6.42766e-10	0.672758	2.26705e-09		TGFBI	2.38373e-16	0.305013	8.01486e-16		CCL5	4.1644e-07	0.815628	8.90908e-07		TNFSF13B	0.00058494	0.392537	0.000892804
IL29	7.54036e-10	0.504162	2.62405e-09		IL18R1	5.10927e-16	0.169013	1.69336e-15		CCR3	5.36338e-07	0.605489	1.11987e-06		IL17RC	0.000654852	0.232258	0.000987957
IFNGR1	1.84112e-09	0.261054	6.32278e-09		BMP2	2.55681e-15	0.143015	8.23862e-15		TNFSF11	8.37324e-07	1.01937	1.73446e-06		IL31RA	0.000875079	0.298373	0.00131262
TNFRSF11A	1.96389e-09	0.542689	6.65683e-09		IL4R	3.90026e-15	0.214853	1.23954e-14		IL21	9.81392e-07	0.357988	2.00112e-06		BMP8B	0.00106706	0.464949	0.00158241
TNF	2.52779e-09	0.630442	8.45838e-09		TNFRSF25	5.26763e-15	0.26164	1.65147e-14		IL12RB2	1.74374e-06	1.22932	3.5009e-06		CCR5	0.00146478	0.435369	0.00212392
CCL2	5.34383e-09	0.535234	1.76549e-08		IL12RB1	1.33694e-14	0.0766364	4.1356e-14		CCL1	1.77468e-06	0.33688	3.53582e-06		ILVBL	0.00149138	0.219234	0.00215056
IFNA10	1.48428e-08	0.108223	4.84247e-08		CXCL1	1.34374e-13	0.0977449	4.10195e-13		CCR1	3.00601e-06	0.586603	5.89902e-06		IL32	0.00167684	0.405805	0.0024047
CXCL13	1.59602e-08	1.15309	5.14273e-08		CCL25	4.92861e-13	0.072108	1.46594e-12		IL1RN	4.06742e-06	0.711594	7.92237e-06		IL23A	0.0019269	0.316303	0.00274821
IFNB1	1.88066e-08	0.329692	5.98599e-08		CXCR4	5.94604e-13	0.407767	1.72435e-12		IL2RB	9.30806e-06	0.657768	1.76044e-05		IL1F5	0.00332639	0.358996	0.0046929
BMP7	2.05118e-08	0.845745	6.45009e-08		TNFRSF6B	8.42459e-13	0.180296	2.41297e-12		BMP8B	1.48906e-05	0.683546	2.796e-05		IL21	0.00452598	0.160133	0.00628341
IL12RB1	2.82054e-08	0.54814	8.76381e-08		IL1RN	1.55113e-12	0.149843	4.38856e-12		IL24	2.14191e-05	0.695899	3.96481e-05		IL13RA1	0.00459334	0.151138	0.00634318
TNFRSF8	3.62426e-08	0.505248	1.11286e-07		CXCL5	5.05483e-12	0.107983	1.41292e-11		TGFBI	3.11904e-05	0.479502	5.6928e-05		TNFSF13	0.0072498	0.204567	0.00970358
IL18RAP	8.51838e-08	0.543256	2.58523e-07		IL7	7.81138e-12	0.0859373	2.15743e-11		TNFSF9	7.39879e-05	0.57702	0.000130479		CCRN4L	0.00723514	0.277812	0.00973387
TNFSF15	9.5295e-08	0.599642	2.85885e-07		TNFRSF10A	8.85112e-12	0.108421	2.41583e-11		TNFRSF13C	8.34942e-05	0.575404	0.00014528		CCR6	0.0118878	0.361961	0.0158302
IL1RAP	1.47726e-07	0.35447	4.33219e-07		CSF2	9.77346e-12	0.0512685	2.63656e-11		IL1F9	8.77224e-05	0.512023	0.000151626		CCL3L1	0.0120751	0.428189	0.015998
XCL1	2.14528e-07	0.543684	6.15294e-07		CCL19	2.3396e-11	0.54103	6.23893e-11		IL8	0.000142225	0.781268	0.000241043		TNFAIP8L2	0.0159993	0.243257	0.0208791
XCL2	2.44549e-07	0.562688	6.93776e-07		CXCL6	3.54144e-11	0.116258	9.33654e-11		TNFAIP8L2	0.00021254	0.40115	0.000355596		IL12RB1	0.0248965	0.303496	0.0318529
CCL3	2.5654e-07	0.453661	7.19968e-07		TNFRSF13B	7.08279e-11	0.179341	1.8463e-10		CXCR6	0.000312091	0.610332	0.0005123		IFNW1	0.0347346	0.0831293	0.0442231
IL31RA	5.42078e-07	0.330739	1.4437e-06		CCR2	1.32982e-09	0.0916375	3.39032e-09		IFNGR2	0.000989107	0.182609	0.00158379		IFNG	0.0719789	0.269011	0.0903197
TNFSF14	7.22521e-07	0.448461	1.88578e-06		CCL17	8.04341e-09	0.0800694	2.02834e-08		IL17RC	0.00103423	0.278739	0.00164595		IL1F10	0.108972	0.0382898	0.134795
TNFRSF4	7.16913e-07	0.432422	1.89004e-06		CSF2RA	1.19247e-08	0.161021	2.91214e-08		ILVBL	0.00135543	0.278568	0.00213112		IL3	0.141307	0.0201282	0.172342
CCL26	9.34534e-07	0.398395	2.41498e-06		TNFSF4	3.24135e-08	0.159024	7.83325e-08		CCL4L2	0.0017861	0.469989	0.00277483		IL1F7	0.140933	0.0741053	0.172692
CCR5	1.99322e-06	0.459984	5.00221e-06		TNFRSF8	9.14923e-08	0.0532381	2.18827e-07		CCRN4L	0.00197609	0.313896	0.00303388		IFNA16	0.146821	0.0104083	0.177408
TNFRSF17	2.53249e-06	0.698765	6.23566e-06		BMP6	2.17508e-07	0.0905008	5.04618e-07		CCL26	0.00203002	0.435954	0.00309845		IFNA10	0.15736	0.0192051	0.189267
IL18R1	2.94132e-06	0.395993	7.17461e-06		IL6R	2.5796e-07	0.0498969	5.92541e-07		IFNA10	0.00255552	0.127428	0.00383329		CCL14-CCL15	0.212386	0.0934377	0.251967
IL27RA	3.61202e-06	0.410921	8.64896e-06		CCL26	3.29487e-07	0.0556282	7.49421e-07		IL20	0.00523244	0.768657	0.00771563		IL2RB	0.246274	0.176824	0.290848
CCL24	4.52086e-06	0.225342	1.07268e-05		BMP5	3.48327e-07	0.0868541	7.84582e-07		IL18BP	0.00593003	0.25987	0.00869516		IL2RG	0.248669	0.177801	0.292354
TNFRSF12A	4.64737e-06	0.372985	1.09276e-05		IL27	3.69132e-07	0.0378147	8.15605e-07		CCL3L1	0.00627909	0.472942	0.00915554		TNFSF8	0.283649	0.127763	0.331984
IL15	4.84612e-06	0.360805	1.11933e-05		TGFB2	3.67773e-07	0.108423	8.20416e-07		TNFSF12-TNFSF13	0.00710283	0.490274	0.0102991		BMP15	0.28732	0.0272545	0.334779
BMP2	4.83173e-06	0.455008	1.12597e-05		TNFRSF1A	8.97186e-07	0.0984654	1.96365e-06		IL26	0.00847521	0.165976	0.0120876		CCL15	0.294563	0.137945	0.341693
CXCR3	5.72756e-06	0.547073	1.31131e-05		CSF2RB	1.26036e-06	0.0338072	2.70744e-06		TNF	0.00870321	0.442687	0.0123453		IFNA4	0.330916	0.0124742	0.382164
TGFBR1	5.8906e-06	0.272141	1.33691e-05		TNFSF9	4.75353e-06	0.0406253	9.9353e-06		IL1F10	0.0120301	0.0731584	0.0167906		IL9	0.377062	0.0109734	0.431636
IL7	6.23698e-06	0.39839	1.40332e-05		CCL21	4.92834e-06	0.247756	1.02087e-05		CSF2	0.0119964	0.261101	0.0168337		CCL22	0.387216	0.135508	0.441324
IL1F8	6.72231e-06	0.11394	1.49959e-05		IL3RA	6.56098e-06	0.0405178	1.33522e-05		CXCL17	0.0124884	0.907765	0.0173376		IFNGR2	0.392277	0.0397763	0.445149
IL18	7.50288e-06	0.365375	1.65954e-05		CCR4	6.62511e-06	0.0438599	1.33654e-05		IFNA4	0.0164875	0.0765084	0.0226486		IFNA7	0.491384	0.00795115	0.552807
IL2RB	7.77077e-06	0.480945	1.69014e-05		ILVBL	1.28804e-05	0.11759	2.57608e-05		IL1F7	0.0190325	0.154707	0.0260078		IFNA14	0.552321	0.00806705	0.618694
IL21	7.83963e-06	0.197854	1.69103e-05		IFNB1	1.54191e-05	0.0404809	3.03154e-05		IL1A	0.0210907	0.341448	0.0282291		IL2RA	0.608466	0.0857871	0.672922
TNFAIP2	9.0663e-06	0.324188	1.93959e-05		CXCL16	2.99366e-05	0.125829	5.83637e-05		CCL22	0.0308676	0.346256	0.0406891		TNFRSF10C	0.614935	0.068561	0.677207
CXCL17	1.14416e-05	0.93284	2.42786e-05		CCL4L2	3.54299e-05	0.158773	6.84978e-05		CSF3R	0.0341559	0.321325	0.0447974		CCL5	0.639209	0.0745711	0.700981
EPO	1.46859e-05	0.575916	3.06642e-05		CXCL2	5.19214e-05	0.0761394	9.87357e-05		IL10	0.0344652	0.282368	0.0449771		CCL4L2	0.642744	0.066192	0.701909
CCL17	1.87005e-05	0.525311	3.84317e-05		IL6	8.56502e-05	0.141047	0.000161552		IL1R2	0.0409118	0.402152	0.0526009		IL1F9	0.680856	0.0288535	0.728293
IL17F	1.94743e-05	0.057111	3.97093e-05		IL28A	0.000494996	0.0333296	0.000918713		IL17F	0.0494814	0.0563327	0.0629982		IL31	0.686749	0.00426972	0.728624
TNFAIP8	2.00242e-05	0.263914	4.05141e-05		TNFRSF11A	0.000711236	0.0270819	0.00129927		TNFSF8	0.0589826	0.236312	0.0740118		TNFRSF19	0.715114	0.049324	0.755647
IFNA4	2.03468e-05	0.0640342	4.08501e-05		CCL11	0.00082954	0.0266478	0.00150354		IL1F8	0.0641783	0.0986009	0.080146		IL26	0.728814	0.0163703	0.763937
CCL4L2	2.36123e-05	0.403797	4.70443e-05		IL1R1	0.000921285	0.0557762	0.00164414		CXCL16	0.0890908	0.181361	0.110202		CCL26	0.744896	0.0375584	0.777671
CSF2RB	3.50852e-05	0.364246	6.88513e-05		ILKAP	0.000963281	0.0651909	0.00170596		IL3	0.137213	0.0220961	0.168134		TNFSF18	0.805315	0.0246377	0.83078
IFNGR2	3.564e-05	0.142833	6.94183e-05		TGFBR1	0.00104091	0.0285365	0.00182948		BMPR1B	0.17396	0.376445	0.210202		CXCL2	9.07917e-93	-4.66767	1.18483e-90
IL17RE	3.72626e-05	0.451064	7.20409e-05		CCR5	0.0010616	0.0267248	0.00185182		TNFSF18	0.185176	0.160078	0.221702		TGFBR2	8.58586e-87	-2.28801	7.4697e-85
IL26	4.25797e-05	0.149605	8.17155e-05		BMPR1A	0.00175618	0.0572736	0.00299584		IL17RB	0.197809	0.188887	0.234673		BMP3	2.07371e-82	-3.45797	1.08248e-80
IL12B	5.08596e-05	0.411398	9.68931e-05		XCL1	0.00188821	0.0238031	0.00319756		IL22	0.206052	0.0227548	0.24225		TPO	1.70511e-82	-2.99005	1.11258e-80
CCR2	8.06416e-05	0.454454	0.000151421		IFNA21	0.0020584	0.0208367	0.00346049		IL10RB	0.214646	0.0651416	0.251222		CX3CL1	5.65742e-81	-3.1729	2.46098e-79
CXCR5	0.000114851	0.502825	0.000214115		IL10RB	0.00231099	0.0724005	0.00385719		IFNA16	0.228004	0.00665456	0.263315		CXCL3	4.38797e-77	-2.8997	1.63609e-75
IL28A	0.000121114	0.206109	0.00022419		IL1RAPL2	0.00302294	0.0202163	0.00500944		CCL18	0.227656	0.333863	0.264081		IL11RA	7.46143e-76	-1.81609	2.16381e-74
IL7R	0.000138144	0.552761	0.000253913		BMP1	0.00361022	0.0752274	0.00594021		IFNA7	0.356748	0.0106667	0.397911		BMP2	1.38492e-75	-2.79865	3.61464e-74
TNFRSF1B	0.000176764	0.267043	0.000320384		CCL3L3	0.00651713	0.133675	0.0105732		XCL2	0.390187	0.137805	0.431521		BMP6	1.17119e-74	-2.3812	2.77892e-73
BMP1	0.000277759	0.236915	0.000496542		IL1F9	0.00663633	0.021173	0.0106919		IFNW1	0.389134	0.0292848	0.432188		TNFRSF10D	3.45932e-74	-2.38508	7.52402e-73
ILKAP	0.000397673	0.105251	0.000696595		IL13RA2	0.00737422	0.0328548	0.0117987		BMP15	0.446774	0.0192031	0.487899		CCL16	7.97633e-69	-1.85339	1.6014e-67
IL28B	0.000550237	0.149098	0.000944815		CCL3	0.0094152	0.110412	0.0149611		CCL14-CCL15	0.478218	0.0430858	0.517904		TGFBR3	5.32938e-68	-3.10184	9.93548e-67
CCL1	0.000549473	0.145083	0.000949752		IL1A	0.0103205	0.0243263	0.0161781		IFNA14	0.56329	0.00777386	0.600076		CCL14	1.71831e-64	-3.65476	2.98986e-63
CSF2RA	0.000654505	0.276003	0.00111651		IL17RA	0.0123605	0.0279503	0.018991		IL20RB	0.569917	0.0878017	0.604668		IFNGR1	1.95924e-64	-1.06418	3.19601e-63
IL6R	0.000663036	0.305916	0.00112372		BMP15	0.0123301	0.016372	0.0190705		TGFB3	0.698641	0.0475191	0.729381		BMPER	1.75044e-63	-3.12394	2.68744e-62
BMP6	0.000889364	0.296283	0.00149757		IFNA2	0.0130737	0.0152887	0.0199546		CCL27	0.789084	0.0168596	0.814036		BMP5	6.67005e-62	-3.52072	9.67157e-61
IL17RA	0.00101843	0.140523	0.00170392		IL17C	0.019565	0.0227292	0.0296672		TNFRSF13B	0.793181	0.0503222	0.81504		IL33	2.49666e-61	-3.66018	3.42962e-60
TNFRSF25	0.00106478	0.312797	0.00177011		IL1RL2	0.0228091	0.0152938	0.03414		TNFAIP2	0.894139	0.0161684	0.915177		CSF3	2.61313e-59	-2.8103	3.41014e-58
TGFB2	0.00111121	0.380012	0.00183561		TNFRSF10C	0.0277998	0.0199433	0.0413433		IL17A	0.957925	0.00275858	0.972834		CXCL12	1.82045e-57	-2.06919	2.26256e-56
IL10RA	0.00112786	0.267227	0.00185139		TNFSF18	0.0377429	0.0158024	0.055773		TNFSF15	0.963439	0.00776722	0.974642		CCL24	8.22196e-57	-1.30274	9.75424e-56
CCL11	0.00130046	0.351429	0.00212138		IL9R	0.0547273	0.0222943	0.080359		IL9	0.991758	9.22249e-05	0.991758		IL17B	1.25655e-52	-3.03133	1.42591e-51
IL17A	0.00156768	0.0817799	0.0025257		IL1F6	0.0617099	0.0110452	0.0894793		CCL19	0.984453	0.00571877	0.992055		CXCR2	1.0967e-51	-1.80642	1.19266e-50
CCR7	0.00168175	0.390624	0.00269287		ILF3	0.0626819	0.0434203	0.0903242		IFNA6	0.988405	0.000128896	0.992207		IL17RD	3.10319e-44	-1.7782	2.99975e-43
IL13RA2	0.00172911	0.30406	0.00275181		IL22RA1	0.0662911	0.0133976	0.0943529		CCL16	1.29405e-99	-2.27193	3.37747e-97		IL6	1.29187e-43	-3.21456	1.2042e-42
IL13	0.00219001	0.145543	0.00344332		IL28B	0.0913182	0.012031	0.129182		TPO	5.33332e-92	-3.82922	6.95998e-90		CCL23	2.55626e-43	-1.90657	2.30063e-42
IL17C	0.00240564	0.203548	0.00375972		CCL16	0.101139	0.0138331	0.142208		TGFBR2	3.03612e-90	-2.54453	2.64143e-88		IL22RA2	2.05314e-42	-2.53119	1.72861e-41
IL11	0.0027765	0.243608	0.00426275		CCL27	0.108078	0.0150435	0.151049		CXCL2	7.67442e-82	-4.42315	5.00756e-80		CCL28	2.36197e-42	-3.15355	1.92648e-41
CCR9	0.00411256	0.151876	0.00627706		ILDR2	0.122241	0.0118788	0.16982		CCL14	7.73585e-81	-5.01048	4.03811e-79		TNFRSF8	3.85702e-41	-1.83819	3.05055e-40
CCR3	0.00502155	0.210939	0.00761992		CCRN4L	0.143503	0.0519717	0.196998		TGFBR3	6.25341e-72	-3.66936	2.72023e-70		CXCL5	1.30686e-40	-2.61803	9.74541e-40
IL1B	0.00726115	0.267365	0.0109547		IL3	0.158463	0.00946517	0.216256		IL11RA	1.19748e-71	-1.93789	4.46488e-70		IL34	9.51371e-40	-2.17349	6.89744e-39
IL22	0.00862622	0.0238149	0.0129393		IL21	0.169121	0.00884155	0.228117		IL33	4.64111e-67	-4.35525	1.21133e-65		CCL21	3.17097e-38	-3.71995	2.17796e-37
IL6	0.00969185	0.37244	0.0144547		CCL23	0.203404	0.0212344	0.271206		CXCL12	3.92778e-65	-2.51521	9.31954e-64		CCL13	9.49393e-38	-2.68173	6.35363e-37
CCR4	0.0100541	0.307341	0.0149098		CCL24	0.219787	0.0071194	0.291375		BMPER	1.73262e-64	-3.65965	3.47858e-63		CXCL1	9.63917e-36	-2.52796	6.28956e-35
TNFAIP8L2	0.0238128	0.157893	0.0345286		CSF1R	0.231501	0.0425482	0.305161		IL17B	6.23318e-53	-3.46482	9.56977e-52		TNFRSF21	2.87342e-35	-1.32746	1.78562e-34
TNFRSF10D	0.0250461	0.204377	0.0361162		IL16	0.239843	0.0196941	0.312605		CX3CR1	2.17766e-49	-2.60275	2.84185e-48		IFNE	2.73974e-32	-1.17267	1.5545e-31
IL23R	0.0276204	0.105512	0.0396095		IL17F	0.273402	0.00739742	0.352385		TNFSF12	3.17553e-48	-1.2928	3.76733e-47		IL6R	3.23103e-32	-1.5293	1.79425e-31
BMP3	0.0320383	0.241393	0.0456939		IL17RE	0.287401	0.00993753	0.368381		CSF3	3.37649e-47	-2.9673	3.83158e-46		CXCL6	8.79409e-32	-1.90043	4.78178e-31
IL1F7	0.032539	0.0806017	0.0459064		IL10	0.314715	0.00593086	0.398983		BMP3	9.11102e-43	-3.21658	9.51191e-42		TNFSF12	2.42597e-31	-0.823801	1.2922e-30
BMP8B	0.0338686	0.218597	0.0475253		CCL1	0.33171	0.00837488	0.415983		CX3CL1	1.55263e-42	-2.47937	1.5586e-41		IL17D	2.48573e-30	-1.48096	1.29755e-29
TNFSF11	0.0343796	0.245432	0.0479844		CCL28	0.338091	0.0174536	0.421705		BMP5	1.44554e-40	-3.39834	1.39736e-39		IL22RA1	7.71442e-27	-1.61435	3.87205e-26
CCL22	0.0498135	0.210748	0.0680697		IFNE	0.374543	0.0056576	0.464674		TNFRSF10D	7.40459e-40	-2.1807	6.66413e-39		IL1R1	1.1686e-26	-1.35416	5.75482e-26
TNFSF18	0.055051	0.13544	0.0744472		IFNK	0.41473	0.00662957	0.509086		CXCR2	7.39171e-40	-1.89066	6.89013e-39		CSF1	1.22921e-24	-1.07428	5.729e-24
IL1F10	0.0625846	0.0348686	0.0833397		TGFB1	0.44424	0.00507783	0.54244		BMP2	8.44652e-38	-2.34365	7.34847e-37		BMPR1A	2.23159e-24	-0.665464	1.02183e-23
CCRL2	0.0680285	0.116379	0.0901291		TNFRSF10D	0.507614	0.00598721	0.610189		CXCL14	8.3605e-37	-3.1111	7.039e-36		IFNA8	3.89384e-24	-0.22979	1.75223e-23
TNFRSF1A	0.068879	0.0619753	0.090795		IL17RD	0.557759	0.00655101	0.643781		CCL28	1.52619e-36	-3.3671	1.2448e-35		TGFB1I1	5.81953e-24	-0.978736	2.5744e-23
TNFRSF10A	0.0703214	0.117863	0.0917695		CXCR2	0.565956	0.00375239	0.646806		CXCL3	3.54825e-36	-2.23976	2.80634e-35		IL1RAPL2	2.91885e-23	-1.57062	1.2697e-22
BMPR1A	0.0702025	0.0831838	0.0920747		IFNA1	0.55526	0.00380585	0.647338		BMP6	1.04436e-34	-2.08491	8.01703e-34		IL7	9.63217e-23	-1.22353	4.12131e-22
CXCL2	0.0734254	0.244523	0.0953435		IL4	0.552615	0.00402373	0.647509		CCL21	3.51796e-34	-3.69196	2.62339e-33		TNFRSF1B	1.18722e-22	-1.03862	4.99783e-22
TNFRSF13B	0.0846978	0.214808	0.108897		TNFSF15	0.677875	0.00348711	0.756092		CCL23	1.0835e-32	-1.7847	7.64308e-32		IL15RA	1.41664e-21	-0.927728	5.77725e-21
CCL23	0.147444	0.12187	0.185908		IL1RL1	0.695611	0.00333044	0.772162		IL6	1.81518e-32	-2.84212	1.24674e-31		IL1RL2	2.02167e-21	-1.57777	8.1178e-21
IFNK	0.162266	0.0240206	0.199771		BMP10	0.737319	0.002288	0.806878		IL17RD	5.47927e-32	-1.80088	3.57522e-31		IFNAR1	2.26178e-21	-0.37165	8.94431e-21
TNFSF8	0.188749	0.108549	0.229133		IL5	0.755107	0.00211184	0.822464		IL17D	7.63122e-31	-1.72689	4.85792e-30		IFNAR2	1.07118e-19	-0.600025	4.11143e-19
IL1R1	0.190001	0.108283	0.229584		IL5RA	0.770191	0.00212301	0.83109		IL1R1	4.2452e-29	-1.24588	2.51818e-28		IL1RAP	1.60949e-19	-0.859963	6.08806e-19
IFNA1	0.206528	0.0190975	0.248405		TNFSF11	0.774808	0.00296635	0.832201		TGFB1I1	4.16386e-28	-1.22354	2.31227e-27		TNFRSF11A	1.97665e-19	-1.14161	7.37007e-19
ILVBL	0.247423	0.0593341	0.294875		TNFAIP1	0.793139	0.00535046	0.844074		IFNGR1	1.35516e-27	-0.803124	7.36871e-27		TGFA	4.32322e-19	-1.33141	1.56717e-18
IFNA13	0.25605	0.021249	0.303768		BMPER	0.811472	0.00196628	0.851862		IL1RAPL1	7.00098e-26	-0.940345	3.65451e-25		IL12A	2.70167e-18	-1.33235	9.27811e-18
IL22RA1	0.283592	0.116156	0.331917		IL13	0.804247	0.00183953	0.851988		CSF1	2.1822e-25	-1.21278	1.09529e-24		TNFAIP8	5.60066e-18	-0.795724	1.89841e-17
TNFRSF6B	0.306947	0.0905562	0.356058		IL1F8	0.80955	0.00152979	0.853707		IL20RA	5.48496e-25	-2.29688	2.70109e-24		IL18RAP	1.1968e-16	-1.17802	4.00467e-16
CCL27	0.306258	0.0516205	0.356845		BMP8A	0.824928	0.001373	0.85439		IL25	4.80391e-24	-0.526109	2.32189e-23		CCL8	1.5169e-16	-1.45118	4.94887e-16
IFNE	0.311368	0.0648759	0.359588		IFNA13	0.861191	0.00110054	0.884054		IL6ST	3.3925e-21	-2.14199	1.47574e-20		IL3RA	1.50434e-16	-0.803997	4.97004e-16
IL17RC	0.358326	0.0464811	0.404861		TNFAIP6	0.890732	0.00542051	0.906359		TNFRSF8	1.02735e-20	-1.33294	4.25615e-20		CCL2	5.40193e-16	-1.15419	1.71939e-15
BMP5	0.397396	0.122385	0.44707		IL1F10	0.889727	0.000878097	0.909325		IL6R	6.26451e-20	-1.22338	2.55474e-19		CX3CR1	2.29971e-15	-1.32714	7.14554e-15
IFNA6	0.491384	0.00403792	0.54575		BMP2K	0.917162	0.00182767	0.929178		BMPR2	7.34854e-20	-0.640078	2.95072e-19		IL20RB	1.56982e-14	-0.844251	4.60364e-14
CSF1R	0.517124	0.0462926	0.564726		IFNA7	0.948708	0.000541697	0.952815		IFNE	7.92819e-20	-1.10779	3.13524e-19		IL17RA	9.77579e-14	-0.450188	2.80383e-13
TNFSF4	0.55688	0.0463992	0.605607		IL1B	0.968288	0.00139347	0.968288		IL1RAPL2	8.85324e-19	-1.72125	3.4488e-18		IL13	2.20147e-13	-0.569991	6.17832e-13
IL1F6	0.570208	0.0106146	0.614977		IL6ST	5.1361e-132	-1.20723	1.19158e-129		IL3RA	1.41077e-18	-0.900381	5.41488e-18		BMPR2	1.16882e-12	-0.447629	3.17772e-12
IL2	0.578061	0.0273106	0.62088		CX3CR1	4.64537e-67	-0.904718	2.69431e-65		BMP4	3.64325e-18	-1.68819	1.3781e-17		IL18R1	1.415e-12	-0.852547	3.80736e-12
CCL19	0.593461	0.106447	0.634809		BMPR1B	7.68987e-66	-1.56323	2.97342e-64		CCL24	1.55591e-17	-1.07739	5.80131e-17		IL16	5.94253e-12	-0.738879	1.56667e-11
CCRN4L	0.611446	0.0360842	0.651377		TNFSF13	1.04341e-48	-0.323961	1.72908e-47		TNFRSF10C	8.10391e-16	-1.03076	2.82016e-15		TNFRSF17	9.802e-12	-1.42355	2.53299e-11
IL1RN	0.663719	0.0430686	0.698511		TGFB3	7.75808e-37	-0.496855	6.20646e-36		IL22RA1	1.00946e-15	-1.4982	3.46671e-15		CCL18	2.30456e-11	-1.5769	5.89695e-11
CCL3L1	0.687044	0.0447532	0.720155		IL20RA	7.49005e-36	-0.450427	5.60546e-35		BMPR1A	1.09554e-15	-0.58228	3.71345e-15		CXCL14	5.89847e-11	-1.58579	1.49466e-10
IFNA7	0.739045	0.00271551	0.771562		EPOR	9.57507e-28	-0.234722	4.93648e-27		IFNA8	2.49862e-14	-0.226398	8.15176e-14		ILK	2.48013e-10	-0.277507	6.22418e-10
IFNA8	0.755247	0.00339177	0.785336		CXCL14	4.8082e-27	-0.813332	2.37341e-26		IFNAR1	1.28863e-13	-0.368148	4.05219e-13		IL1RAPL1	1.20376e-09	-0.627083	2.96397e-09
IL3	0.843192	0.00196789	0.863032		IL17RB	3.6343e-25	-0.520335	1.72073e-24		TNFRSF1B	2.37597e-13	-0.771574	7.38249e-13		IL17RE	1.27728e-09	-0.945148	3.11562e-09
IL4	0.862973	0.00263401	0.879828		TGFBR3	1.73424e-24	-0.622257	8.04685e-24		IL16	1.25912e-12	-0.809705	3.77736e-12		BMP4	2.74221e-09	-0.932264	6.56621e-09
CCL21	0.885005	0.0279864	0.895296		CCL15	4.22523e-22	-0.543579	1.75045e-21		IL1RL1	4.17886e-12	-1.17664	1.23941e-11		CSF2RA	4.10524e-09	-0.677498	9.74062e-09
IL4R	0.88225	0.00902532	0.895981		BMP4	1.43675e-15	-0.422002	4.69475e-15		ILK	4.43592e-12	-0.35792	1.30087e-11		CCR10	9.04615e-09	-0.668826	2.07109e-08
IFNAR1	0.902776	0.0035019	0.909748		TNFRSF14	2.68398e-13	-0.20993	8.08679e-13		CXCR1	2.03073e-11	-1.1871	5.7611e-11		IL27RA	1.11363e-08	-0.678022	2.52745e-08
TNFAIP6	0.986281	0.00134886	0.986281		IL17D	5.49807e-13	-0.146198	1.61462e-12		IL34	3.93885e-11	-1.31455	1.09366e-10		CSF1R	2.19598e-08	-0.586288	4.94096e-08
BMPR1B	3.63473e-31	-2.7585	2.37166e-29		BMPR2	3.78213e-10	-0.138874	9.74948e-10		BMP2K	2.48756e-10	-0.596191	6.55812e-10		XCL1	2.52777e-08	-0.81894	5.63888e-08
TNFRSF10C	3.66523e-30	-1.09932	1.19578e-28		IL1RAPL1	8.11259e-09	-0.128822	2.02379e-08		CCR10	2.61765e-10	-0.784524	6.83207e-10		TNFAIP3	2.6005e-08	-0.565034	5.75195e-08
CX3CR1	2.86433e-28	-1.27561	6.22993e-27		TNFAIP8L3	1.0237e-08	-0.124544	2.52658e-08		IL7	1.16736e-09	-0.825138	2.84749e-09		IL15	2.69455e-08	-0.598653	5.86066e-08
IL6ST	6.89097e-27	-1.56396	1.28467e-25		TNFRSF10B	1.10083e-07	-0.130361	2.60604e-07		EPOR	1.23824e-09	-0.602496	2.9924e-09		IL4R	2.98365e-08	-0.501212	6.4358e-08
TGFB3	1.03067e-26	-0.809164	1.79337e-25		IFNAR1	1.14467e-07	-0.087111	2.68245e-07		CCL13	1.73164e-09	-1.40039	4.14641e-09		TNFRSF1A	4.16489e-08	-0.256556	8.8377e-08
ILDR1	4.8116e-23	-0.623703	5.7083e-22		IFNA10	9.37639e-07	-0.045665	2.03301e-06		TNFAIP8	3.00293e-08	-0.53181	6.75659e-08		IL20RA	8.68991e-08	-1.07503	1.82909e-07
TNFSF12	5.61617e-21	-0.468994	6.10758e-20		CXCL12	1.73381e-06	-0.265124	3.69031e-06		IL4R	4.05937e-08	-0.492186	9.05553e-08		IL12RB2	1.15928e-07	-1.04042	2.42058e-07
CCL14	1.20956e-20	-1.35572	1.26278e-19		TNFRSF18	3.25064e-06	-0.125724	6.85589e-06		TNFRSF10B	2.74462e-07	-0.408803	5.96955e-07		IL25	1.22343e-07	-0.329285	2.53425e-07
EPOR	7.23577e-20	-0.596402	6.99458e-19		TNFRSF19	6.47006e-06	-0.206324	1.32837e-05		CXCL6	4.42213e-07	-1.06597	9.38355e-07		IFNA13	6.0492e-07	-0.12986	1.21449e-06
CXCL14	1.03488e-18	-1.5253	9.00349e-18		IL13RA1	1.3878e-05	-0.107512	2.75187e-05		CXCL1	5.20371e-07	-1.21996	1.0953e-06		BMP2K	6.00836e-07	-0.505075	1.21564e-06
IL20	3.35416e-18	-1.68834	2.65284e-17		IL24	3.90053e-05	-0.0692976	7.47871e-05		CSF1R	9.37764e-07	-0.539995	1.92722e-06		CCL4	6.80875e-07	-0.653442	1.35655e-06
IL20RA	4.00881e-18	-1.22185	3.07735e-17		TGFB1I1	0.000210809	-0.0963837	0.000394418		IL1RAP	1.36246e-06	-0.505493	2.7566e-06		BMP7	8.97913e-07	-0.981929	1.77542e-06
TPO	1.5827e-17	-0.839169	1.18024e-16		IL33	0.000567434	-0.124086	0.0010448		IL17RA	2.20757e-06	-0.309665	4.36498e-06		IFNK	1.47117e-06	-0.10295	2.82335e-06
TNFSF13	4.88406e-14	-0.42033	2.83275e-13		ILK	0.000893033	-0.0787359	0.00160608		TNFRSF11B	4.86462e-06	-0.851053	9.40493e-06		IL7R	1.60176e-06	-1.0168	3.05152e-06
CCL16	4.56384e-12	-0.418541	2.01892e-11		CSF1	0.00112525	-0.0297801	0.00194819		TNFRSF14	5.5599e-06	-0.433556	1.06701e-05		CCL3	1.85772e-06	-0.651484	3.51351e-06
BMP4	3.89402e-10	-0.755927	1.41158e-09		TNFSF10	0.00115594	-0.160625	0.00198651		IL13	5.93033e-06	-0.424448	1.12979e-05		IL1R2	2.22335e-06	-0.75419	4.11556e-06
TNFRSF14	1.0438e-07	-0.323565	3.09582e-07		IL19	0.00402292	-0.0414283	0.00657266		CCL2	1.81783e-05	-0.618955	3.38896e-05		TGFB2	4.26031e-06	-0.742138	7.83058e-06
CXCL12	1.68509e-07	-0.44602	4.88677e-07		TPO	0.00977071	-0.0193317	0.0154204		IL18RAP	2.727e-05	-0.634766	5.01231e-05		IFNA1	4.29349e-06	-0.0939188	7.83637e-06
IL25	2.67937e-07	-0.196824	7.43954e-07		IL28RA	0.0103388	-0.0605577	0.016098		TNFSF10	3.40359e-05	-0.563821	6.169e-05		IL23R	4.74953e-06	-0.329364	8.60852e-06
CXCR1	3.32692e-07	-0.622683	9.14027e-07		CSF3R	0.0211518	-0.0961739	0.0318651		TNFRSF11A	4.28941e-05	-0.598925	7.72095e-05		CCRL2	5.58072e-06	-0.430389	9.9765e-06
IL13RA1	3.7313e-07	-0.226265	1.01445e-06		CCL3L1	0.0565965	-0.0451779	0.0825811		CXCL5	4.37413e-05	-1.1331	7.81951e-05		TNFRSF10B	1.25091e-05	-0.300379	2.17659e-05
IL1RL1	3.87384e-07	-0.558396	1.04234e-06		IL2	0.0628736	-0.0112711	0.0900413		IL5RA	4.79448e-05	-0.476122	8.51265e-05		TNFSF14	1.31448e-05	-0.558504	2.27204e-05
TGFBR3	1.51266e-06	-0.56752	3.87064e-06		CCR6	0.127981	-0.0386995	0.176736		IL1RL2	8.28886e-05	-0.712666	0.000145194		CSF2RB	1.82146e-05	-0.525017	3.12763e-05
IL1RAPL1	1.81973e-06	-0.313262	4.61116e-06		IFNW1	0.167113	-0.0086897	0.226726		IL15RA	9.14204e-05	-0.419584	0.000156979		TNFRSF11B	3.86986e-05	-0.731032	6.60153e-05
IL24	2.136e-06	-0.541934	5.30948e-06		IFNA6	0.186833	-0.00858749	0.250551		TNFRSF21	0.000101129	-0.452806	0.000172514		IL13RA2	9.01467e-05	-0.495237	0.000150822
IL33	2.94452e-06	-0.695076	7.11593e-06		IL12B	0.234469	-0.00792456	0.307327		IL22RA2	0.000203795	-0.921287	0.000343164		TGFBR1	9.87385e-05	-0.325048	0.000164145
BMPER	7.52849e-06	-0.535706	1.65121e-05		TGFBR2	0.246659	-0.0472769	0.319692		IL18R1	0.000213847	-0.456554	0.000355504		TNFAIP1	0.000102161	-0.162384	0.000168759
BMPR2	1.29763e-05	-0.192449	2.7313e-05		IFNA8	0.313239	-0.0239684	0.399294		IL28RA	0.000311873	-0.520432	0.000515182		IL1B	0.000116622	-0.583148	0.00019024
CCR6	1.62202e-05	-0.41864	3.3599e-05		IL17RC	0.326923	-0.0220443	0.412208		CCL3L3	0.000365195	-0.491568	0.000595724		IL1RL1	0.000134282	-0.618245	0.000217687
TNFAIP8L3	2.71498e-05	-0.341163	5.36826e-05		CCRL2	0.393208	-0.00750598	0.485235		TNFRSF1A	0.000654657	-0.19458	0.00106128		IL10RB	0.000138643	-0.163483	0.000223369
CSF3R	7.11212e-05	-0.392374	0.000134512		IL26	0.44552	-0.00468129	0.541155		IL17RE	0.000827791	-0.494084	0.00133366		CCR2	0.000235007	-0.589501	0.000374005
IL17RB	0.000159799	-0.331625	0.000291661		IL22	0.496099	-0.00408869	0.599453		TNFAIP8L3	0.00104999	-0.39133	0.0016609		TNFSF15	0.000261151	-0.591875	0.000408146
TGFBR2	0.00021601	-0.256521	0.000388817		IL11RA	0.523012	-0.0189178	0.625458		TGFBRAP1	0.00157875	-0.31201	0.00246739		TNFRSF25	0.00037532	-0.481433	0.000579637
TGFB1I1	0.0003366	-0.244803	0.000597636		IL17B	0.54334	-0.0111547	0.643137		CSF2RA	0.00194304	-0.401495	0.00300079		IL5RA	0.000388681	-0.384427	0.000596739
TNFAIP8L1	0.000357815	-0.176859	0.000631011		IL1F5	0.541785	-0.00387938	0.644585		TNFAIP1	0.00216523	-0.185221	0.00328561		TNFSF12-TNFSF13	0.000650755	-0.878827	0.000987482
IL17B	0.000426883	-0.433485	0.000742776		IFNA4	0.547614	-0.00522879	0.644906		CCRL2	0.00250832	-0.31401	0.00378423		IL8	0.00090702	-0.634124	0.00135275
TGFB1	0.00134549	-0.178761	0.00218119		IFNA14	0.55609	-0.00386044	0.645065		TNFRSF17	0.00292744	-0.724784	0.00436606		TNFAIP2	0.00126068	-0.30802	0.00185897
CCL3L3	0.00174962	-0.278182	0.00276758		CXCR1	0.563191	-0.0059609	0.646833		IFNA13	0.00468416	-0.108611	0.0069464		CCR9	0.00135025	-0.236612	0.00197987
TNFRSF19	0.00257657	-0.297156	0.00400288		IL25	0.603278	-0.00472862	0.686081		IL5	0.00722199	-0.12246	0.010414		IL28RA	0.00136952	-0.359169	0.00199689
IL17D	0.00263918	-0.245927	0.0040759		TNFRSF11B	0.614013	-0.0167178	0.694883		IL23R	0.00777277	-0.223851	0.0111467		CXCR1	0.00239856	-0.564419	0.0034023
ILK	0.0103893	-0.0804134	0.0153199		IL17A	0.65965	-0.00243415	0.742907		TGFA	0.0113897	-0.467779	0.0160687		IL6ST	0.00334282	-0.578038	0.00469073
TNFSF10	0.0115363	-0.223251	0.0169156		IFNA5	0.665513	-0.0032283	0.745889		TNFSF13	0.013706	-0.215763	0.0189274		TNFSF10	0.00373149	-0.340571	0.00520812
IL28RA	0.0222186	-0.161262	0.0323969		BMP3	0.697872	-0.00365329	0.770982		IL12A	0.0196795	-0.416296	0.0267518		XCL2	0.00500243	-0.424883	0.00687176
TNFRSF10B	0.0322085	-0.108424	0.045687		IL31RA	0.708815	-0.00227522	0.779361		IL7R	0.0205302	-0.464035	0.0277637		IL10RA	0.00585719	-0.327086	0.00800381
IL19	0.0366755	-0.271558	0.0509165		IL22RA2	0.765922	-0.00303705	0.830345		IFNA1	0.0209184	-0.0748212	0.0281428		TGFBRAP1	0.00634296	-0.242108	0.00862246
IFNW1	0.0371521	-0.0538446	0.0513053		CSF3	0.778001	-0.00232847	0.83178		IL4	0.0299235	-0.0542496	0.0398472		IL2	0.00700222	-0.20286	0.00946932
CCL15	0.0428522	-0.176785	0.0588653		IL9	0.817388	-0.00145877	0.850376		IL2	0.0304841	-0.175549	0.0403876		IL5	0.0121097	-0.103659	0.0159628
IL11RA	0.0537153	-0.121793	0.0730192		CCR3	0.815725	-0.00173196	0.852469		IFNK	0.0345192	-0.0789296	0.0448234		IL4	0.0140349	-0.0568836	0.0184075
CSF1	0.0569982	-0.138505	0.0766832		IL31	0.846628	-0.00139768	0.872968		TGFB2	0.0377206	-0.362126	0.0487381		CXCL16	0.0166245	-0.185428	0.021587
TNFRSF18	0.0618632	-0.220853	0.0828015		CCR9	0.934587	-0.000872505	0.942714		IL1B	0.0426847	-0.315783	0.0546113		IL17A	0.0232558	-0.0790213	0.0300483
CSF3	0.0761125	-0.157001	0.0983434							IL27RA	0.0517574	-0.267101	0.0655761		TNFRSF10A	0.0246715	-0.207884	0.0317205
IFNA2	0.105845	-0.0184401	0.135419							IL15	0.0529199	-0.237849	0.0667251		IL18BP	0.0544774	-0.16217	0.0690224
IFNA21	0.107061	-0.0362092	0.136307							XCL1	0.0818062	-0.275257	0.101673		IL10	0.0560782	-0.23467	0.0707072
IL3RA	0.143719	-0.0963841	0.182091							TNFRSF19	0.113439	-0.247832	0.139658		IL1F6	0.0901221	-0.0488556	0.112009
CCR10	0.150387	-0.115698	0.188707							CCL3	0.146505	-0.197823	0.178681		IL1A	0.0900746	-0.176039	0.112486
CCL28	0.157745	-0.21355	0.196992							IFNA2	0.152997	-0.0216671	0.185731		CCL3L3	0.121124	-0.213386	0.14912
IL1RAPL2	0.161604	-0.150633	0.199898							IFNA21	0.183143	-0.0435702	0.220277		CSF2	0.141885	-0.102571	0.172242
IL9	0.161101	-0.0108812	0.200226							CCL8	0.193539	-0.233662	0.230656		TNFRSF14	0.182403	-0.109991	0.218381
BMP2K	0.170771	-0.0911159	0.209254							TNFRSF25	0.200478	-0.168636	0.236763		TNF	0.190504	-0.187755	0.22704
IL17REL	0.177398	-0.161468	0.216359							IFNAR2	0.224065	-0.0875847	0.261075		TNFRSF13B	0.357857	-0.164486	0.411457
IL5RA	0.224181	-0.0916948	0.268401							CSF2RB	0.232985	-0.160771	0.267882		TNFRSF13C	0.416449	-0.115848	0.470534
CXCR2	0.271561	-0.0842429	0.320712							IL1F6	0.241456	-0.0382409	0.276404		IL1F8	0.554956	-0.0153387	0.61899
TGFBRAP1	0.280095	-0.0699014	0.329301							TNFAIP3	0.246147	-0.117418	0.280543		IFNA5	0.559196	-0.0162837	0.621065
CCL14-CCL15	0.313024	-0.0503519	0.359909							IL13RA2	0.277311	-0.191178	0.314688		CCR1	0.645952	-0.0529311	0.696668
BMP8A	0.318816	-0.0758519	0.36496							IL13RA1	0.344366	-0.0751276	0.389089		CCL27	0.645415	-0.034761	0.698976
TNFRSF11B	0.338391	-0.120021	0.385677							CCR9	0.347918	-0.0847365	0.391408		IFNA6	0.644715	-0.00390903	0.701127
IL16	0.34779	-0.0708259	0.394666							TNFRSF10A	0.356365	-0.0900206	0.39919		TNFAIP8L3	0.665389	-0.0501676	0.714677
IFNA16	0.444214	-0.00375372	0.497596							TNFSF14	0.426053	-0.110044	0.469198		CXCR6	0.68248	-0.0624263	0.72705
IL31	0.461404	-0.00499571	0.514643							CCR2	0.431318	-0.135048	0.473		CCL19	0.716451	-0.100728	0.754007
IL5	0.501874	-0.0188012	0.552697							BMP10	0.473086	-0.0150037	0.514481		TNFSF9	0.776327	-0.0366271	0.807257
TNFAIP1	0.500761	-0.0228371	0.553807							TGFBR1	0.529451	-0.0529065	0.571019		TGFBI	0.793242	-0.0262157	0.821572
ILDR2	0.511932	-0.0514178	0.561405							IFNA5	0.535074	-0.0209594	0.57471		BMP10	0.819991	-0.00573149	0.842589
BMP10	0.56825	-0.00927221	0.615408							BMP7	0.556802	-0.136184	0.595595		IFNA21	0.827591	-0.00736107	0.847064
IFNA17	0.619682	-0.00239276	0.657468							IL10RA	0.624176	-0.059859	0.659554		IFNA2	0.862092	-0.00322704	0.87893
BMP15	0.654146	-0.00805143	0.691223							IFNA17	0.635817	-0.00325222	0.669147		IFNA17	0.907714	-0.000859467	0.921842
IL17RD	0.794503	-0.0226882	0.822878							CCR6	0.692652	-0.0566791	0.726033		IL22	0.920863	-0.00106003	0.93157
IFNA5	0.809637	-0.00467574	0.835238							CCL15	0.715456	-0.0388401	0.74396		CXCL17	0.927654	-0.0250751	0.934817
IL9R	0.83083	-0.0181178	0.853727							CCL4	0.720784	-0.0489762	0.746526		EPOR	0.944036	-0.00609351	0.947667
IFNA14	0.973622	-0.000293193	0.977367							IL31	0.936871	-0.000725986	0.955169		IL17F	0.952186	-0.000778319	0.952186
ssGSEA score
CCR gene-set
Comparison	wilcox.test P-value
TP53-mutated BCs vs.TP53-wildtype BCs (TCGA)	1.9e-10
TP53-mutated BCs vs.TP53-wildtype BCs (METABEIC)	5.32419e-39
TP53-mutated BCs vs. normal tissue	0.0396785
TP53-wildtype BCs vs. normal tissue	5.43431e-13

## Sheet: Table S8
Table S8. Comparison of the enrichment levels of the inflammation-promoting and parainflammation (PI) signatures between two classes of samples.
Pro-inflammatory genes
TP53 mutated vs. TP53 wildtype										TP53 mutated vs. normal tissue					TP53 wildtype vs. normal tissue
TP53 mutated vs. TP53 wildtype					METABRIC					TCGA					TCGA
Gene symbol	P-value	Log2(fold change)	FDR		Gene symbol	P-value	Log2(fold change)	FDR		Gene symbol	P-value	Log2(fold change)	FDR		Gene symbol	P-value	Log2(fold change)	FDR
CXCL10	4.57259e-29	1.46107	6.85889e-28		CXCL10	3.19467e-85	1.39053	5.11147e-84		CXCL10	3.98409e-65	3.81727	5.97614e-64		CXCL10	1.64812e-35	2.3562	2.47218e-34
GZMB	2.80324e-23	1.45628	2.10243e-22		GZMB	2.02599e-75	1.00343	1.62079e-74		CXCL9	3.17406e-33	2.99388	2.38054e-32		CXCL9	4.86787e-15	1.76798	2.43394e-14
IL12A	1.07845e-16	0.916054	5.39224e-16		CXCL9	5.86718e-67	1.39913	3.12916e-66		STAT1	1.86559e-26	1.23798	9.32793e-26		STAT1	1.19056e-12	0.722534	4.46458e-12
IFNG	2.46967e-16	0.964253	9.26125e-16		STAT1	7.22489e-60	0.839065	2.88996e-59		CXCL13	5.40334e-21	3.03959	2.02625e-20		IL12B	4.05815e-12	1.00486	1.21744e-11
CXCL9	1.96196e-14	1.2259	5.88587e-14		GNLY	2.74183e-56	0.807839	8.77386e-56		IL12B	8.7827e-21	1.41626	2.63481e-20		CXCL13	2.47668e-09	1.8865	5.30716e-09
STAT1	3.15405e-12	0.515448	7.88512e-12		CCL5	2.69858e-47	0.921448	7.19622e-47		IFNG	1.89443e-10	1.23326	4.73608e-10		IRF1	9.43839e-07	0.427031	1.7697e-06
PRF1	3.53331e-11	0.729839	6.62496e-11		PRF1	7.12836e-38	0.360138	1.62934e-37		IRF1	1.76296e-09	0.641585	3.77776e-09		CD19	0.00273396	0.683305	0.00372813
GNLY	3.21086e-11	0.85599	6.88042e-11		IFNG	1.13226e-33	0.286551	2.26452e-33		CD19	4.49869e-09	1.47385	7.49782e-09		IFNG	0.0719789	0.269011	0.0830526
CCL5	5.87052e-11	0.741057	9.7842e-11		CXCL13	2.63085e-31	0.737888	4.67707e-31		GZMB	4.42409e-09	1.29789	8.29517e-09		CCL5	0.639209	0.0745711	0.639209
CD8B	4.05212e-09	0.732955	6.07818e-09		IRF1	3.14584e-30	0.421907	5.03334e-30		CCL5	4.1644e-07	0.815628	6.2466e-07		IL12A	2.70167e-18	-1.33235	2.02625e-17
CXCL13	1.59602e-08	1.15309	2.17639e-08		CD19	2.19068e-25	0.480436	3.18645e-25		CD8B	0.031374	0.390379	0.0392175		PRF1	1.5372e-11	-1.03187	3.84301e-11
TBX21	2.83656e-07	0.583016	3.54569e-07		IL12A	1.50082e-18	0.155888	2.00109e-18		GNLY	0.931466	0.0161996	0.998		GNLY	2.66887e-06	-0.839791	4.44812e-06
CD19	1.57512e-06	0.79055	1.81745e-06		CD8B	1.02679e-11	0.0695389	1.26375e-11		IL12A	0.0196795	-0.416296	0.0268357		TBX21	0.000177126	-0.594669	0.000265689
IL12B	5.08596e-05	0.411398	5.44924e-05		IGKC	2.58834e-11	0.257066	2.9581e-11		PRF1	0.0545871	-0.302031	0.0629852		CD8B	0.0495844	-0.342576	0.0619804
IRF1	0.00099317	0.214554	0.00099317		IL12B	0.234469	-0.00792456	0.2501		TBX21	0.94174	-0.0116528	0.94174		GZMB	0.420019	-0.15839	0.450021
					TBX21	0.369709	-0.0122247	0.369709
Parainflammation (PI) genes
Gene symbol	P-value	Log2(fold change)	FDR		Gene symbol	P-value	Log2(fold change)	FDR		Gene symbol	P-value	Log2(fold change)	FDR		Gene symbol	P-value	Log2(fold change)	FDR
CXCL10	4.57259e-29	1.46107	1.82904e-27		CXCL10	3.19467e-85	1.39053	1.15008e-83		CXCL10	3.98409e-65	3.81727	5.31212e-64		ISG15	1.67226e-39	2.48645	1.67226e-38
LGMN	1.52327e-23	0.480785	1.52327e-22		CXCL9	5.86718e-67	1.39913	1.05609e-65		PLAUR	3.63206e-63	2.08205	3.63206e-62		PLAUR	1.60909e-38	1.38089	1.28727e-37
PLAUR	2.70326e-23	0.701163	2.16261e-22		AIM2	1.94853e-55	0.576334	1.75368e-54		ISG15	2.64263e-50	2.94176	1.76176e-49		CD276	4.3534e-37	0.755553	2.90226e-36
AIM2	5.84581e-21	1.17544	3.8972e-20		MX2	4.71173e-43	0.541604	2.82704e-42		CD276	1.56494e-41	0.961331	8.94251e-41		CXCL10	1.64812e-35	2.3562	9.41783e-35
MMP7	6.56778e-18	1.48267	3.75302e-17		MX1	1.25522e-35	0.769563	6.45543e-35		CXCL9	3.17406e-33	2.99388	1.58703e-32		BLNK	9.35473e-26	0.987803	4.67737e-25
MX2	1.62517e-15	0.63249	7.22299e-15		MMP7	2.01345e-35	1.08698	9.06053e-35		OAS3	3.85145e-25	1.32259	1.54058e-24		OAS3	4.36737e-20	1.12799	1.94105e-19
ICAM1	1.58773e-15	0.634638	7.93863e-15		IFIT2	1.90467e-26	0.464818	7.61868e-26		AIM2	6.06657e-23	1.96762	2.20603e-22		TNFRSF12A	8.0022e-16	1.01939	2.90989e-15
CXCL9	1.96196e-14	1.2259	7.84783e-14		LGMN	3.47564e-24	0.360292	1.25123e-23		TNFRSF12A	3.66879e-22	1.39237	1.22293e-21		CXCL9	4.86787e-15	1.76798	1.49781e-14
ANXA1	3.83832e-11	0.517352	1.39575e-10		ISG15	2.6495e-23	0.644372	8.67109e-23		OAS2	1.08859e-21	1.41811	3.34951e-21		OAS2	9.21296e-15	1.10176	2.63227e-14
TLR2	4.84682e-10	0.434173	1.61561e-09		IFIT3	4.56456e-23	0.480505	1.36937e-22		MX1	3.78814e-17	1.38789	1.08232e-16		CCND1	8.90284e-14	1.01196	2.22571e-13
PLA2G2D	9.25864e-09	0.993931	2.84881e-08		PLAUR	4.70011e-22	0.343599	1.30157e-21		OAS1	3.54261e-16	1.14862	9.44697e-16		OAS1	3.34077e-13	0.983619	7.42394e-13
MX1	1.97644e-07	0.598697	5.2705e-07		ANXA1	2.817e-18	0.395725	7.24372e-18		HMOX1	6.64536e-15	0.919748	1.66134e-14		BST2	1.75016e-10	0.893118	3.50032e-10
HMOX1	3.54377e-07	0.350164	8.85942e-07		TNFRSF12A	1.9905e-17	0.354915	4.7772e-17		BLNK	6.0577e-11	0.722511	1.34616e-10		NOX1	1.11582e-08	0.496779	2.12538e-08
CD276	4.47926e-07	0.205778	1.05394e-06		OAS2	3.17e-16	0.268014	7.13249e-16		MX2	4.12927e-09	0.710547	8.69319e-09		HMOX1	8.97053e-08	0.569583	1.56009e-07
TNFRSF12A	4.64737e-06	0.372985	8.85213e-06		OAS1	5.28683e-13	0.319224	1.11956e-12		ICAM1	1.65933e-08	0.698479	3.16063e-08		MX1	1.11207e-06	0.789194	1.85345e-06
SCARB1	7.80335e-06	0.263483	1.41879e-05		IL1RN	1.55113e-12	0.149843	3.10226e-12		PLA2G2D	5.07164e-08	1.45152	9.22117e-08		AIM2	2.43871e-06	0.792185	3.90194e-06
CD14	9.82964e-06	0.313489	1.7095e-05		CD276	8.07287e-11	0.169833	1.5296e-10		IFIT3	3.4655e-07	0.70991	5.77583e-07		IL1RN	5.78435e-06	0.668525	8.899e-06
IFIT3	3.56149e-05	0.399296	5.69838e-05		CD14	1.81412e-08	0.224753	3.10992e-08		IFIT2	1.92161e-06	0.666384	3.07457e-06		IFIT1	0.000796666	0.56471	0.00113809
RETNLB	7.20683e-05	0.0585477	0.000110874		IFIT1	8.28239e-08	0.337889	1.3553e-07		IL1RN	4.06742e-06	0.711594	6.25757e-06		IFIT2	0.00923175	0.314725	0.0119119
IFIT2	9.67129e-05	0.351659	0.000143278		PLA2G2A	2.07741e-07	0.231978	3.2516e-07		NOX1	5.0356e-06	0.402622	7.46014e-06		IFIT3	0.0223199	0.310614	0.0278999
ISG15	0.000243301	0.455313	0.000347572		NOX1	2.93219e-07	0.0361594	4.39828e-07		BST2	7.73891e-06	0.71141	1.10556e-05		IFITM3	0.028159	0.214046	0.0341322
OAS2	0.0013844	0.316344	0.00190952		TLR2	5.1033e-07	0.0421047	7.06611e-07		IFIT1	7.07443e-05	0.666383	9.43257e-05		PLA2G2D	0.0594169	0.457593	0.0699023
OAS3	0.0215458	0.194595	0.027801		HMOX1	7.66033e-06	0.155685	1.02138e-05		IFITM3	0.0207871	0.2588	0.0251965		RETNLB	0.152128	0.0157436	0.173861
OAS1	0.081109	0.165002	0.092696		BST2	0.000151884	0.205413	0.000188545		RETNLB	0.0227449	0.0742913	0.0267587		CD44	0.486146	0.0711632	0.525563
PLA2G2A	0.132581	0.306663	0.14333		PLA2G2D	0.249824	0.00749865	0.272535		PPARG	1.20541e-75	-3.3626	4.82165e-74		MX2	0.477215	0.078057	0.530239
IFIT1	0.393791	0.101672	0.414517		IFITM3	0.358981	0.0324462	0.369238		IL33	4.64111e-67	-4.35525	9.28222e-66		ICAM1	0.550179	0.0638406	0.579136
IFITM3	0.529916	0.0447549	0.543503		ICAM1	0.815826	0.00323929	0.815826		ANXA1	1.45225e-55	-2.2324	1.1618e-54		PTGES	0.789755	0.0371754	0.810005
IL1RN	0.663719	0.0430686	0.663719		PLAT	2.39535e-56	-1.00859	2.87442e-55		PLAT	5.20415e-28	-1.84025	2.31296e-27		ANXA1	5.40568e-109	-2.74975	2.16227e-107
PLAT	3.78172e-26	-1.21824	7.56343e-25		CCND1	5.98197e-51	-0.78615	4.30702e-50		PLA2G2A	1.97895e-11	-2.28964	4.65635e-11		PPARG	1.10605e-94	-3.17274	2.21211e-93
CCND1	4.46277e-24	-1.03325	5.95037e-23		REL	1.17969e-08	-0.0904812	2.12345e-08		ITGA2	8.46882e-09	-0.900716	1.69376e-08		IL33	2.49666e-61	-3.66018	3.32888e-60
ITGA2	1.84058e-07	-0.484629	5.2588e-07		PTGES	3.03164e-07	-0.262292	4.36556e-07		TIRAP	1.18308e-07	-0.357892	2.05752e-07		PLA2G2A	1.49837e-17	-2.5963	5.9935e-17
TIRAP	1.36563e-06	-0.203309	3.03473e-06		PPARG	4.74638e-05	-0.158196	6.10249e-05		CD14	1.49108e-05	-0.455866	2.05667e-05		LGMN	1.9095e-15	-0.578713	6.36499e-15
IL33	2.94452e-06	-0.695076	6.19899e-06		IL33	0.000567434	-0.124086	0.000680921		PTGES	0.00280132	-0.433543	0.00361461		SCARB1	7.85445e-14	-0.541405	2.09452e-13
PTGES	3.16726e-06	-0.470718	6.33453e-06		CD44	0.000871257	-0.126473	0.00101178		SCARB1	0.0107873	-0.277923	0.0134841		CD14	2.15765e-13	-0.769355	5.07682e-13
BLNK	3.28057e-05	-0.265292	5.46762e-05		TIRAP	0.133148	-0.0131926	0.149792		REL	0.0470897	-0.259096	0.0538168		MMP7	6.78602e-11	-1.59698	1.42864e-10
REL	0.00440811	-0.252854	0.00587748		BLNK	0.352739	-0.00685113	0.373488		LGMN	0.253719	-0.0979274	0.28191		TLR2	2.00446e-08	-0.541248	3.64447e-08
CD44	0.0266944	-0.160613	0.033368							TLR2	0.329851	-0.107075	0.356595		PLAT	9.97644e-05	-0.622002	0.000147799
PPARG	0.030649	-0.189859	0.0371503							CD44	0.369343	-0.0894501	0.388783		ITGA2	0.00269635	-0.416087	0.0037191
BST2	0.0764481	-0.181708	0.0899389							MMP7	0.702517	-0.114313	0.72053		TIRAP	0.00632115	-0.154583	0.0084282
NOX1	0.116813	-0.0941573	0.129793							CCND1	0.889013	-0.0212953	0.889013		REL	0.961074	-0.00624214	0.961074
ssGSEA score
Pro-inflammatory gene-set
Comparison	wilcox.test P-value
TP53-mutated BCs vs.TP53-wildtype BCs (TCGA)	2.07e-17
TP53-mutated BCs vs.TP53-wildtype BCs (METABEIC)	1.8145e-61
TP53-mutated BCs vs. normal tissue	2.41e-26
TP53-wildtype BCs vs. normal tissue	1.34115e-09
PI gene-set
Comparison	wilcox.test P-value
TP53-mutated BCs vs.TP53-wildtype BCs (TCGA)	1.03e-09
TP53-mutated BCs vs.TP53-wildtype BCs (METABEIC)	5.03294e-37
TP53-mutated BCs vs. normal tissue	6.89e-12
TP53-wildtype BCs vs. normal tissue	0.00341094

## Sheet: Table S9
Table S9. Comparison of the enrichment levels of the HLA signature between two classes of samples.
HLA genes
TP53 mutated vs. TP53 wildtype										TP53 mutated vs. normal tissue					TP53 wildtype vs. normal tissue
TCGA					METABRIC					TCGA					TCGA
Gene symbol	P-value	Log2(fold change)	FDR		Gene symbol	P-value	Log2(fold change)	FDR		Gene symbol	P-value	Log2(fold change)	FDR		Gene symbol	P-value	Log2(fold change)	FDR
HLA-DOB	1.66738e-20	1.11982	4.00172e-19		HLA-F	6.33e-43	0.522201	6.65e-42		HLA-DPB2	1.28973e-15	1.29472	3.09536e-14		HLA-DPB2	2.58146e-11	0.849311	3.09775e-10
HLA-F	7.98754e-13	0.63156	9.58505e-12		HLA-DOB	1.06e-45	0.492599	2.24e-44		HLA-DQB1	2.1177e-11	1.04192	1.27062e-10		HLA-C	5.85957e-10	0.569891	4.68766e-09
HLA-G	1.68282e-05	0.482635	5.04846e-05		HLA-B	3.35e-27	0.478614	1.41e-26		HLA-DQA2	1.10166e-08	1.02016	3.30498e-08		HLA-DQB1	1.72571e-07	0.750823	8.28339e-07
HLA-B	2.88394e-10	0.471398	2.30716e-09		HLA-E	1.92e-37	0.447918	1.35e-36		HLA-DQA1	4.89473e-08	0.930683	1.17474e-07		HLA-DQB2	1.66224e-06	0.841583	6.64896e-06
HLA-A	2.1444e-09	0.448769	1.28664e-08		HLA-A	0.000116083	0.414074	0.000187519		HLA-DQB2	1.09238e-06	0.924319	2.18475e-06		HLA-DQA2	2.93423e-05	0.692648	0.000100602
HLA-DPB2	1.61213e-06	0.445406	5.52732e-06		HLA-DQA1	2.98e-11	0.408922	6.26e-11		HLA-C	2.67207e-15	0.814383	3.20649e-14		HLA-DQA1	0.000199084	0.537184	0.000597253
HLA-H	8.08916e-08	0.424824	3.23566e-07		HLA-H	1.72e-14	0.401237	5.17e-14		HLA-A	4.16282e-12	0.788005	3.33025e-11		HLA-A	0.00088162	0.339237	0.00235099
HLA-DQA1	0.000169376	0.393499	0.000451669		HLA-G	1.88e-28	0.370455	9.89e-28		HLA-B	2.15248e-11	0.73025	1.03319e-10		HLA-DRB1	0.00885113	0.328015	0.0177023
HLA-DRB6	0.00353023	0.349628	0.00564836		HLA-DRA	5e-08	0.271155	9.54e-08		HLA-F	9.08371e-08	0.720618	1.9819e-07		HLA-H	0.0109718	0.282974	0.0202556
HLA-E	4.49067e-08	0.332572	2.15552e-07		HLA-DMA	5.6e-13	0.268811	1.47e-12		HLA-H	5.39235e-09	0.707798	1.8488e-08		HLA-B	0.0122001	0.258851	0.0209145
HLA-DQA2	0.00453288	0.327509	0.00639936		HLA-DMB	7.57e-13	0.264983	1.77e-12		HLA-DOB	0.000230677	0.654698	0.000395447		HLA-DRB5	0.0192082	0.392788	0.0307331
HLA-DQB1	0.00355923	0.291102	0.00533885		HLA-DRB6	0.00406549	0.251225	0.00502208		HLA-G	0.000800015	0.576104	0.00128002		HLA-DPB1	0.122782	0.172642	0.173339
HLA-L	0.000276716	0.28577	0.000603744		HLA-C	5.62e-06	0.191933	9.83e-06		HLA-DRB1	4.60549e-05	0.567941	8.50244e-05		HLA-DRA	0.18682	0.1435	0.249093
HLA-DRA	0.00153229	0.251979	0.00282885		HLA-DPA1	0.00160271	0.153343	0.00210355		HLA-DRB6	0.00108302	0.56719	0.00152897		HLA-DRB6	0.217393	0.217562	0.274601
HLA-C	0.000230205	0.244492	0.000552492		HLA-DPB1	0.000126733	0.138245	0.0001901		HLA-DRB5	0.00287393	0.533253	0.00363023		HLA-L	0.30523	0.114467	0.366276
HLA-DRB1	0.00715667	0.239926	0.00954223		HLA-DOA	0.000260422	0.137729	0.000364591		HLA-L	0.000847784	0.400236	0.00127168		HLA-F	0.448109	0.089059	0.512125
HLA-DMA	0.000818317	0.235099	0.00163663		HLA-DRB4	0.119218	0.0979519	0.131767		HLA-DRA	0.00108938	0.395478	0.0014525		HLA-G	0.554038	0.0934691	0.604405
HLA-DMB	0.0024481	0.230114	0.00419674		HLA-DQB1	0.16853	0.0819745	0.176956		HLA-DMB	0.0159622	0.281943	0.0191546		HLA-DMB	0.618355	0.0518282	0.64524
HLA-DRB5	0.224385	0.140465	0.25644		HLA-DQA2	0.085666	0.0134824	0.0999437		HLA-DPB1	0.0535836	0.232601	0.0612384		HLA-DPA1	0.69745	0.0423744	0.69745
HLA-DOA	0.219344	0.107302	0.263213		HLA-DRB1	0.716966	-0.0444197	0.716966		HLA-DPA1	0.482517	0.0865043	0.503496		HLA-E	1.0226e-23	-0.871663	2.45425e-22
HLA-DQB2	0.498167	0.082736	0.519827							HLA-E	3.80785e-09	-0.539091	1.52314e-08		HLA-J	1.7416e-08	-0.705925	1.04496e-07
HLA-DPB1	0.45657	0.0599591	0.498076							HLA-J	1.15149e-08	-0.828579	3.07063e-08		HLA-DMA	0.00163473	-0.308204	0.00392334
HLA-DPA1	0.583056	0.0441299	0.583056							HLA-DMA	0.496843	-0.0731048	0.496843		HLA-DOB	0.00512769	-0.465117	0.0111877
HLA-J	0.172718	-0.122655	0.21817							HLA-DOA	0.285211	-0.145596	0.311139		HLA-DOA	0.0307221	-0.252898	0.0460832
ssGSEA score
HLA gene-set
Comparison	wilcox.test P-value
TP53-mutated BCs vs.TP53-wildtype BCs (TCGA)	1.63e-05
TP53-mutated BCs vs.TP53-wildtype BCs (METABEIC)	9.37261e-17
TP53-mutated BCs vs. normal tissue	2.1e-08
TP53-wildtype BCs vs. normal tissue	0.000366684
