# Supplementary material for: TP53 Mutations Promote Immunogenic Activity in Breast Cancer
Source: J Oncol. 2019 Jun 2;2019:5952836. doi: 10.1155/2019/5952836 (PMC6582869; doi:10.1155/2019/5952836)
Supplement: Supplementary Materials — Supplementary Tables. Table S1: the list of 26 immune signatures and related gene sets. Table S2: sample sizes of breast cancers. Table S3: ssGSEA scores of immune signature in TCGA and METABRIC. Table S4: primer sequences used for real time quantity PCR. Table S5: comparison of the enrichment levels of 15 immune cell types and function signatures between two classes of samples. Table S6: comparison of the enrichment levels of the tumor-infiltrating lymphocytes signature between two classes of samples. Table S7: comparison of the enrichment levels of the cytokine and cytokine receptor signature between two classes of samples. Table S8: comparison of the enrichment levels of the inflammation-promoting and parainflammation (PI) signatures between two classes of samples. Table S9: comparison of the enrichment levels of the HLA signature between two classes of samples. Table S10: comparisons of the ssGSEA scores of immune signatures between TP53-mutated and TP53-wildtype BCs and their associations with survival prognosis in BC. Table S11: comparisons of the expression levels of immune genes between TP53-mutated and TP53-wildtype BCs and their associations with survival prognosis in BC. Table S12: comparisons of the expression levels of genes and their protein products between TP53-mutated and TP53-wildtyped BCs. Table S13: comparisons of the enrichment levels of immune signatures between TP53-mutated and TP53-wildtype BCs within the ER+ subtype of BC. Table S14: comparisons of the enrichment levels of immune signatures between TP53-mutated and TP53-wildtype BCs within the HER2- subtype of BC. Table S15: comparisons of the enrichment levels of immune signatures between TP53-mutated and TP53-wildtype BCs within the 100% tumor purity of BC. Table S16: comparisons of the enrichment levels of the cancer-testis signature between two classes of samples. Table S17: comparisons of the enrichment levels of the Treg signature between two classes of samples. Table S18: comparisons [file 5952836.f1.zip › 5952836.f1/Supplementary Tables 12-19.xlsx]

## Sheet: Table S12
Table S12. Comparisons of the expression levels of genes and their protein products between TP53-mutated and TP53-wildtyped BCs.
Gene					Protein
Gene symbol	P-value	Log2(fold change)	FDR		Protein symbol	P-value	Log2(fold change)	FDR
EGFR	2.08e-19	1.21054	1.7e-18		EGFR	2.33e-08	0.169447	1.04e-07
CDH3	1.28e-26	1.45923	1.89e-25		P-Cadherin	1.37e-08	0.151974	7.06e-08
TFRC	9.97e-29	0.787631	1.79e-27		TFRC	9.01e-16	0.430034	1.23e-14
CCNE1	1.24e-55	1.66728	4.24e-53		Cyclin_E1	4.75e-26	0.408972	1.38e-24
CDK1	1.03e-35	0.959695	3.48e-34		CDK1	1.96e-08	0.132997	9.49e-08
CDKN2A	1.77e-28	1.28183	3.09e-27		p16_INK4a	7.49e-12	0.411699	5.99e-11
CHEK1	1.08e-51	0.941109	2.15e-49		Chk1	0.00327383	0.0576316	0.00703267
FOXM1	3.3e-47	1.32762	3.54e-45		FoxM1	9.97e-32	0.487981	5.78e-30
NDRG1	4.24e-32	1.04475	1.03e-30		NDRG1_pT346	9.42e-10	0.403025	5.6e-09
STMN1	2.04e-43	0.930878	1.49e-41		Stathmin	0.0137448	0.0610114	0.0261377
ESR1	4.66e-68	-3.57385	1.06e-64		ER-alpha	6.23e-42	-2.14369	1.45e-39
GATA3	8.51e-63	-2.18017	8.32e-60		GATA3	1.01e-30	-1.09325	4.68e-29
PGR	6.99e-42	-3.07065	4.34e-40		PR	1.3e-14	-0.994159	1.51e-13
AR	2.28e-27	-1.9033	3.58e-26		AR	1.99e-14	-0.522968	2.2e-13
ERBB3	3.42e-26	-0.714739	4.87e-25		HER3	6.91e-06	-0.169291	2.26e-05
BCL2	2e-53	-1.57958	5.14e-51		Bcl-2	6.45e-30	-0.722516	2.49e-28
IGF1R	1.28e-32	-1.27953	3.24e-31		IGF1R_pY1135_Y1136	0.00106804	-0.0600343	0.00252842
CCND1	4.46e-24	-1.03325	5.28e-23		Cyclin_D1	1.58e-05	-0.137097	5.03e-05
Note:
1. Red color indicates that the gene or protein has significantly higher expression levels in TP53-mutated BCs than in TP53-wildtype BCs, and purple color indicates that the gene or protein has significantly lower expression levels in TP53-mutated BCs than in TP53-wildtype BCs. It applies to all the supplementary tables.

## Sheet: Table S13
Table S13. Comparisons of the enrichment levels of immune signatures between TP53-mutated and TP53-wildtyped BCs within the ER+ subtype of BC.
	TCGA			METABRIC
	ER+/TP53-mutated vs. ER+/TP53-wildtype			ER+/TP53-mutated vs. ER+/TP53-wildtype
	Immune gene-set	P-value		Immune gene-set	P-value
	B cells	0.495264		B cells	2.32e-05
	CD4+ Regulatory T cells	6.07e-09		CD4+ Regulatory T cells	4.6e-11
	CD8+ T cells	0.050826		CD8+ T cells	4.92e-13
	Macrophages	1.27e-06		Macrophages	0.000140163
	Neutrophils	0.182167		Neutrophils	0.0178313
	NK cells	0.0682941		NK cells	0.00153611
	pDCs	0.0192652		pDCs	3.55e-17
	MHC Class I	2.13e-07		MHC Class I	4.13e-08
	APC Co-stimulation	3.84e-09		APC Co-stimulation	6.63e-16
	APC Co-inhibition	0.00847923		T cell Co-stimulation	2.02e-14
	T cell Co-stimulation	9.2e-06		APC Co-inhibition	1.05e-07
	T cell Co-inhibition	4.12e-07		T cell Co-inhibition	1.05e-18
	Type I IFN Reponse	0.000127271		Type I IFN Reponse	1.79e-20
	Type II IFN Reponse	0.000239792		Type II IFN Reponse	0.042025
	Cytolytic Activity	0.00123002		Cytolytic Activity	1.87e-12
	TILs	0.00385918		TILs	1.54e-12
	Immune cell infiltrate	0.0127884		Immune cell infiltrate	2.45e-12
	Treg	0.00197854		Treg	1.12e-11
	Immune checkpoint	1.37e-05		Immune checkpoint	2.11e-19
	CCR	0.00761813		CCR	1.24e-09
	CT	2.13e-11		CT	0.000841936
	HLA	0.0364048		HLA	1.24e-07
	PI	7.69e-05		PI	4.55e-15
	Pro-inflammatory	2.11e-06		Pro-inflammatory	2.21e-21
	Metastasis-promoting	0.00999277		Metastasis-promoting	0.0834691
	Metastasis-inhibiting	0.148564		Metastasis-inhibiting	0.0111323
Note:
1. Red color indicates that the gene or gene-set has significantly higher expression or enrichment levels in TP53-mutated BCs than in TP53-wildtype BCs, and purple color indicates that the gene or gene-set has significantly lower expression or enrichment levels in TP53-mutated BCs than in TP53-wildtype BCs. It applies to all the supplementary tables.

## Sheet: Table S14
Table S14. Comparisons of the enrichment levels of immune signatures between TP53-mutated and TP53-wildtyped BCs within the HER2- subtype of BC.
			TCGA			METABRIC
			HER2-/TP53-mutated vs. HER2-/TP53-wildtype			HER2-/TP53-mutated vs. HER2-/TP53-wildtype
			Immune gene-set	P-value		Immune gene-set	P-value
			B cells	0.340064		B cells	1.29e-10
			CD4+ Regulatory T cells	1.00092e-14		CD4+ Regulatory T cells	7.1e-31
			CD8+ T cells	0.00761198		CD8+ T cells	2.2e-23
			Macrophages	1.37469e-06		Macrophages	1.81e-15
			Neutrophils	0.00316814		Neutrophils	0.00942256
			NK cells	0.0395182		NK cells	8.4e-09
			pDCs	0.011045		pDCs	8.54e-34
			MHC Class I	1.23064e-11		MHC Class I	5.64e-19
			APC Co-stimulation	2.29501e-13		APC Co-stimulation	4.42e-42
			T cell Co-stimulation	1.56336e-08		T cell Co-stimulation	4.93e-30
			APC Co-inhibition	0.000785908		APC Co-inhibition	6.38e-17
			T cell Co-inhibition	5.19184e-08		T cell Co-inhibition	1.79e-44
			Type I IFN Reponse	0.000350588		Type I IFN Reponse	5.07e-27
			Type II IFN Reponse	7.61197e-06		Type II IFN Reponse	0.0026318
			Cytolytic Activity	3.94421e-05		Cytolytic Activity	2.73e-29
			TILs	0.000156235		TILs	3.94e-27
			Immune cell infiltrate	0.0162897		Immune cell infiltrate	2.03e-25
			Treg	9.5961e-09		Treg	2.2e-35
			Immune Checkpoint	2.51988e-08		Immune Checkpoint	1.49e-47
			CCR	6.12416e-06		CCR	5.4e-34
			CT	9.17841e-23		CT	2.76e-26
			HLA	0.00167469		HLA	1.66e-16
			PI	1.72279e-05		PI	1.05e-33
			Pro-inflammatory	4.13466e-09		Pro-inflammatory	1.39e-50
			Metastasis-promoting	0.000566613		Metastasis-promoting	0.00604096
			Metastasis-inhibiting	0.0790757		Metastasis-inhibiting	0.00596189
Note:
1. Red color indicates that the gene or gene-set has significantly higher expression or enrichment levels in TP53-mutated BCs than in TP53-wildtype BCs, and purple color indicates that the gene or gene-set has significantly lower expression or enrichment levels in TP53-mutated BCs than in TP53-wildtype BCs. It applies to all the supplementary tables.

## Sheet: Table S15
Table S15. Comparisons of the enrichment levels of immune signatures between TP53-mutated and TP53-wildtyped BCs within the 100% tumor purity of BC.
			TCGA
		100% tumor purity/TP53-mutated vs. 100% tumor purity/TP53-wildtype
				P-value
			B cells	0.284044
			CD4+ Regulatory T cells	0.000402411
			CD8+ T cells	0.0475558
			Macrophages	0.00657694
			Neutrophils	0.287006
			NK cells	0.000167604
			pDCs	0.00137766
			MHC Class I	0.00440908
			APC Co-stimulation	0.00158776
			APC Co-inhibition	0.00567282
			T cell Co-stimulation	0.00163313
			T cell Co-inhibition	0.000532644
			Type I IFN Reponse	0.0641469
			Type II IFN Reponse	0.11881
			Cytolytic Activity	0.00397853
			TILs	0.00253894
			Immune cell infiltrate	0.0165465
			Treg	0.00163313
			Immune Checkpoint	0.00418886
			CCR	0.00475883
			CT	0.000442117
			HLA	0.00122822
			PI	0.0359491
			Pro-inflammatory	0.00267952
			Metastasis-promoting	0.0241867
			Metastasis-inhibiting	0.275249
Note:
1. Red color indicates that the gene or gene-set has significantly higher expression or enrichment levels in TP53-mutated BCs than in TP53-wildtype BCs, and purple color indicates that the gene or gene-set has significantly lower expression or enrichment levels in TP53-mutated BCs than in TP53-wildtype BCs. It applies to all the supplementary tables.

## Sheet: Table S16
Table S16. Comparisons of the enrichment levels of the cancer-testis signature between two classes of samples.
Cancer-testis (CT) antigen genes
TP53 mutated vs. TP53 wildtype										TP53 mutated vs. normal tissue					TP53 wildtype vs. normal tissue
TCGA					METABRIC					TCGA					TCGA
Gene symbol	P-value	Log2(fold change)	FDR		Gene symbol	P-value	Log2(fold change)	FDR		Gene symbol	P-value	Log2(fold change)	FDR		Gene symbol	P-value	Log2(fold change)	FDR
TTK	1.05967e-55	1.37679	1.18153e-53		KIF2C	2.17089e-129	0.82062	4.49374e-127		CEP55	1.29913e-134	4.2793	2.89707e-132		NUF2	8.67523e-113	3.58494	1.93458e-110
KIF2C	2.60267e-52	1.33405	1.45099e-50		TTK	4.15926e-119	0.844916	4.30484e-117		NUF2	9.77808e-133	4.66718	1.09026e-130		PBK	4.9486e-102	3.44898	5.51769e-100
CEP55	1.35272e-46	1.21027	6.03313e-45		CEP55	7.1402e-105	0.735694	4.92674e-103		KIF2C	9.27912e-131	4.38685	6.89748e-129		CEP55	2.00287e-99	3.06903	1.4888e-97
FANCA	2.11581e-45	1.16002	7.86375e-44		OIP5	2.81589e-73	0.562852	1.45722e-71		OIP5	4.64773e-121	3.33238	2.59111e-119		KIF2C	8.56353e-94	3.0528	4.77417e-92
OIP5	6.56105e-39	0.930503	2.09016e-37		CXorf61	2.48279e-50	0.394873	7.34198e-49		PBK	5.07448e-108	4.10015	2.26322e-106		OIP5	2.48213e-89	2.40188	1.10703e-87
CXorf61	1.35143e-35	2.01207	3.76712e-34		CASC5	4.57671e-49	0.156001	1.18422e-47		TTK	8.81869e-106	3.88062	3.27761e-104		PLAC1	1.16636e-74	3.29057	4.33496e-73
HORMAD1	6.07968e-35	2.33598	1.50641e-33		ATAD2	1.09295e-47	0.499089	2.51378e-46		FANCA	3.68862e-79	2.86541	1.17509e-77		TTK	8.10001e-73	2.50382	2.58043e-71
ACTL8	8.01018e-35	2.30162	1.78627e-33		HORMAD1	1.32161e-43	0.372117	2.73574e-42		CASC5	1.15228e-78	3.38582	3.21199e-77		ODF2	2.50556e-64	0.851001	6.98426e-63
NUF2	4.443e-33	1.08223	8.25658e-32		LEMD1	1.26697e-40	0.400383	2.38422e-39		ATAD2	9.87587e-73	2.2706	2.44702e-71		CASC5	1.01978e-58	2.5943	2.27412e-57
TMEFF1	1.77395e-31	0.852227	3.04301e-30		ROPN1	5.0499e-36	0.742307	8.71107e-35		PLAC1	3.98453e-41	2.71152	8.07773e-40		SPAG1	9.17274e-46	1.30771	1.46109e-44
LEMD1	3.65603e-31	1.62221	5.82354e-30		LY6K	4.71339e-34	0.139397	7.50516e-33		ODF2	6.64704e-39	0.855114	1.23524e-37		ATAD2	2.71213e-45	1.51363	4.03203e-44
DMRT1	2.28264e-30	1.08163	3.39353e-29		CCNA1	6.94093e-31	0.221501	1.02627e-29		KDM5B	7.95988e-36	0.919316	1.2679e-34		FANCA	1.40928e-42	1.70539	1.84865e-41
MAGEB4	9.38226e-30	1.24903	1.30765e-28		NUF2	2.97559e-29	0.228064	4.10632e-28		ACTL8	5.18217e-34	4.00263	7.70416e-33		KDM5B	7.9922e-39	0.897737	9.38032e-38
ATAD2	5.8481e-26	0.756966	7.67133e-25		PRAME	2.07185e-28	0.53393	2.52278e-27		KIF20B	2.74276e-26	1.00478	3.39797e-25		GPATCH2	1.5668e-28	0.908692	1.51912e-27
MAGEA5	2.39384e-24	0.475554	2.96571e-23		CSAG2	5.30571e-26	0.255752	5.78043e-25		SPAG4	1.5072e-25	1.55716	1.68053e-24		ARMC3	7.75174e-28	2.39851	7.20266e-27
MAGEB1	2.5401e-24	1.00524	2.98127e-23		RQCD1	4.28413e-25	0.229905	4.43407e-24		PRAME	1.21983e-24	4.34651	1.29534e-23		SPAG4	5.79967e-24	1.2373	4.45975e-23
ROPN1	9.49064e-23	1.91252	1.05821e-21		ACTL8	6.00255e-21	0.152746	5.9168e-20		SPAG1	4.49024e-23	1.08773	4.55147e-22		TEKT5	2.87498e-20	1.0666	1.94279e-19
ANKRD45	1.05372e-20	0.871181	1.02165e-19		SPAG9	2.96819e-19	0.191877	2.45766e-18		GPATCH2	1.40412e-19	0.641577	1.25247e-18		CABYR	9.78849e-18	0.971791	6.4201e-17
PRAME	1.17768e-20	2.58169	1.09426e-19		MAGEA6	3.19331e-19	0.212019	2.54237e-18		ARMC3	9.42475e-14	1.68989	7.24731e-13		ACTL8	2.74625e-14	1.70101	1.70115e-13
TMPRSS12	3.25839e-20	0.45197	2.90648e-19		PBK	3.6556e-18	0.266344	2.60934e-17		DMRT1	4.43353e-13	1.3286	3.08962e-12		KIF20B	4.46373e-14	0.612591	2.6903e-13
CAGE1	1.40657e-19	0.534505	1.20641e-18		CSAG1	3.06472e-16	0.300835	2.11466e-15		TMEFF1	6.16557e-13	0.81437	4.04389e-12		TSSK6	1.18655e-13	0.663012	6.78462e-13
MAGEA6	5.89626e-19	1.88237	4.86987e-18		MAGEA4	1.12309e-15	0.202528	7.49933e-15		RQCD1	7.66841e-13	0.497363	4.88587e-12		ZNF165	9.1598e-12	0.604981	4.86342e-11
MAGEA4	1.80286e-18	1.45094	1.43585e-17		SPAG4	2.69504e-15	0.189779	1.74335e-14		DCAF12	1.69088e-12	0.397872	1.0191e-11		SPA17	2.96114e-11	0.657188	1.50076e-10
MAGEA3	1.86722e-17	1.72727	1.43583e-16		MAGEA10	6.43885e-15	0.194403	3.92012e-14		CSAG1	1.16849e-11	1.76928	6.85719e-11		DCAF12	5.44689e-10	0.263593	2.64056e-09
LY6K	1.93898e-17	1.44072	1.44131e-16		DMRT1	1.08934e-14	0.0745706	6.44267e-14		ZNF165	1.40619e-11	0.762169	8.04054e-11		LYPD6B	1.29241e-09	1.16102	6.00434e-09
CSAG1	5.50877e-17	1.15174	3.96276e-16		DKKL1	1.13567e-14	0.0911453	6.53012e-14		HORMAD1	2.51059e-11	2.45289	1.36552e-10		CCDC83	2.38162e-09	0.672822	1.04137e-08
CTCFL	1.22236e-16	0.420878	8.51829e-16		TAF7L	2.09708e-14	0.0717938	1.17323e-13		TAF7L	2.8572e-11	0.876078	1.51704e-10		CTAGE5	3.09903e-09	0.322774	1.32901e-08
MAGEA2	5.0759e-16	1.30114	3.43008e-15		XAGE2	4.83644e-13	0.171996	2.56704e-12		TEKT5	4.78254e-11	0.896573	2.48025e-10		MAGEA1	8.61597e-08	1.27511	3.55808e-07
CSAG2	1.74596e-15	0.9685	1.14514e-14		TMEM108	6.98646e-12	0.158334	3.52731e-11		MAGEA6	2.73458e-10	2.48311	1.32567e-09		POTEH	1.72058e-07	0.418542	6.97616e-07
CASC5	3.44458e-15	0.791516	2.07606e-14		DSCR8	1.02542e-10	0.106564	4.93632e-10		MAGEA3	7.21307e-10	2.33154	3.35107e-09		DSCR8	1.57259e-06	0.661241	5.94386e-06
TEX15	3.4004e-15	0.874715	2.10636e-14		MAEL	1.36972e-09	0.171553	6.16374e-09		CXorf61	1.61847e-09	1.94912	7.36569e-09		TEX14	2.14955e-06	0.927578	7.8582e-06
PBK	2.49968e-13	0.651174	1.46692e-12		ELOVL4	1.97005e-09	0.14292	8.49586e-09		CSAG2	2.09145e-09	1.38601	9.32786e-09		PRAME	2.13922e-06	1.76482	7.95077e-06
ELOVL4	2.72719e-13	0.723288	1.55939e-12		MAGEA12	1.6876e-08	0.0743186	7.12924e-08		MAGEA12	7.93917e-09	1.7236	3.40468e-08		IMP3	3.03648e-06	0.206383	1.09215e-05
MAGEA10	5.1168e-13	0.67639	2.85262e-12		MAGEC1	1.27517e-07	0.0662742	5.17569e-07		CALR3	2.1122e-08	0.385023	8.88718e-08		POTEC	4.1936e-06	0.705022	1.4844e-05
TAF7L	8.74491e-13	0.571549	4.75638e-12		PAGE2	2.15785e-07	0.161244	8.42784e-07		SPANXN3	2.56263e-08	0.21442	1.05827e-07		CALR3	7.28304e-06	0.24894	2.42406e-05
SLCO6A1	9.59243e-13	0.319022	5.09313e-12		LOC440934	6.02406e-07	0.0592534	2.30922e-06		CTCFL	3.48298e-08	0.495506	1.41219e-07		ACRBP	8.15095e-06	0.411092	2.67303e-05
MAGEA12	3.37013e-12	1.10112	1.70804e-11		THEG	8.73833e-07	0.0475184	3.28879e-06		MAGEA2	9.24307e-08	1.64644	3.5538e-07		POTED	1.66145e-05	0.397024	5.21835e-05
RQCD1	3.56593e-12	0.290264	1.76711e-11		MAGEA9B	1.19823e-06	0.0972017	4.42916e-06		MAGEA1	1.0498e-07	1.26134	3.96789e-07		PIWIL1	1.76195e-05	0.28084	5.45715e-05
KIF20B	5.38702e-12	0.392187	2.61153e-11		CRISP2	3.54843e-06	0.0829083	1.24496e-05		DKKL1	1.09787e-07	0.754824	4.08042e-07		CSAG1	1.95067e-05	0.617542	5.9589e-05
LUZP4	5.90593e-12	0.190066	2.80217e-11		SYCP1	5.71074e-06	0.0828325	1.9702e-05		CABYR	2.76822e-07	0.693594	1.01199e-06		POTEB	2.41925e-05	0.240339	7.29045e-05
NOL4	9.09213e-12	0.9223	4.13785e-11		ZNF165	7.09176e-06	0.112421	2.40655e-05		MAGEA4	5.09468e-07	1.65988	1.80335e-06		SPANXB2	2.45624e-05	0.604264	7.30323e-05
XAGE2	1.38033e-11	0.71929	6.15629e-11		DDX43	7.56546e-06	0.0579985	2.52589e-05		LUZP4	5.77232e-07	0.266874	2.01129e-06		MAGEC2	3.41756e-05	0.763256	0.000100278
CRISP2	4.38402e-11	0.711126	1.91693e-10		BAGE	1.90292e-05	0.0620916	6.15475e-05		DSCR8	7.06584e-07	0.922863	2.42413e-06		MAGEC1	8.19699e-05	0.610299	0.00023435
TDRD6	7.10458e-11	0.561499	3.04677e-10		PAGE2B	2.16661e-05	0.111653	6.89983e-05		MAGEC1	7.66723e-07	1.05082	2.5906e-06		MAEL	0.000104194	0.553444	0.000290439
CCNA1	8.24056e-11	0.774196	3.46725e-10		MAGEA2	2.29789e-05	0.0365703	7.20702e-05		TSSK6	1.52956e-06	0.484847	5.09093e-06		RQCD1	0.000115671	0.207099	0.000318452
CTAG1B	2.21267e-10	0.844746	9.1375e-10		GAGE6	3.13048e-05	0.156422	9.67178e-05		MAGEC2	1.64923e-06	1.17002	5.40849e-06		POTEG	0.000131472	0.200391	0.000357539
DKKL1	3.24502e-10	0.645041	1.31571e-09		LDHC	5.98474e-05	0.0928217	0.000182183		LDHC	3.96751e-06	0.976616	1.28225e-05		SPANXN3	0.000134344	0.11383	0.000360949
TDRD1	1.6725e-08	1.02512	6.32148e-08		TMEFF1	8.36803e-05	0.026551	0.000251041		CAGE1	8.82495e-06	0.488979	2.77178e-05		MAGEA12	0.000214591	0.622478	0.000569689
LDHC	3.36025e-08	0.796381	1.24889e-07		CT45A3	9.54511e-05	0.112242	0.000282262		PIWIL1	1.57145e-05	0.289794	4.80047e-05		SPEF2	0.000669006	0.32439	0.00169532
MAGEB6	9.16547e-08	0.216515	3.35066e-07		MAGEA3	0.000157228	0.037947	0.000458396		MAGEA11	3.76204e-05	0.731859	0.000110386		CTAGE1	0.000957926	0.252278	0.00234744
FATE1	1.56382e-07	0.417752	5.62472e-07		CT45A6	0.000298755	0.117623	0.000858922		POTEE	5.1639e-05	0.406311	0.000149552		CSAG2	0.000990244	0.417507	0.00240027
RBM46	2.36584e-07	0.332937	8.24348e-07		GAGE12I	0.000676466	0.13007	0.00186705		MAEL	6.5334e-05	0.891779	0.000186788		TAF7L	0.00442106	0.304529	0.0103779
MAGEA11	6.27796e-07	0.467142	2.08953e-06		ACRBP	0.000801928	0.0260095	0.0021842		MAGEB1	6.95519e-05	0.779636	0.000193876		BRDT	0.00558079	0.487533	0.0129637
NXF2	7.75872e-07	0.308563	2.5444e-06		FATE1	0.000868167	0.0448951	0.0023339		SPANXB2	7.91268e-05	0.404586	0.000217843		MAGEA3	0.00586446	0.604267	0.0134822
TEX101	9.2048e-07	0.221879	2.97488e-06		CTAG2	0.00119941	0.072159	0.00314275		MAGEA9B	0.000232297	0.907786	0.000624123		MAGEA6	0.00908344	0.600739	0.0206695
PASD1	1.57058e-06	0.194777	4.93295e-06		GAGE8	0.00131928	0.113349	0.00341365		TEX15	0.000254662	0.769688	0.000676067		DMRT1	0.0100217	0.246971	0.0225741
FTHL17	1.88167e-06	0.398293	5.82796e-06		SSX4B	0.00217777	0.025391	0.0055654		PAGE2B	0.000260727	0.566885	0.000684025		LUZP4	0.0102439	0.0768074	0.0228438
MAGEA9B	8.69182e-06	0.588203	2.61929e-05		GAGE12B	0.00263931	0.106318	0.00650402		MAGEA10	0.000285466	0.727692	0.000740221		GAGE4	0.0113706	0.31451	0.0251055
TPPP2	9.55346e-06	0.147723	2.84056e-05		SPINLW1	0.00263228	0.0252655	0.00656484		MAGEB6	0.000384222	0.284436	0.000984844		MAGEA11	0.012023	0.264717	0.0262856
SSX2	1.17712e-05	0.410983	3.32275e-05		DCAF12	0.00261398	0.0536842	0.0065987		ACRBP	0.000423861	0.35214	0.0010741		PAGE2	0.0149666	0.261303	0.0320918
XAGE5	1.16397e-05	0.171157	3.32777e-05		FTHL17	0.00288385	0.0248679	0.00702302		SSX2	0.000644179	0.622042	0.00161407		PAGE2B	0.0156921	0.28754	0.033327
FAM46D	1.84618e-05	0.280038	5.14622e-05		TEX15	0.00332467	0.0228746	0.00800242		CT45A1	0.000746734	0.640868	0.00185024		GAGE12D	0.0205021	0.300071	0.0427287
SPANXN3	2.38844e-05	0.10059	6.57558e-05		XAGE1D	0.00379208	0.151781	0.00902252		SSX1	0.000859837	0.672048	0.00210707		PTPN20A	0.0210347	0.146831	0.0430343
SSX3	2.55419e-05	0.158096	6.94615e-05		NOL4	0.0043986	0.0624565	0.0102304		CT45A5	0.00104209	0.465362	0.00252593		PAGE5	0.0243608	0.226718	0.0489411
SSX1	3.46308e-05	0.444518	9.19365e-05		MAGEC2	0.00652971	0.0355685	0.0150183		MAGEA5	0.00112409	0.322256	0.00266674		SSX2	0.0266161	0.211059	0.0529946
DPPA2	3.64341e-05	0.173115	9.5586e-05		NXF2	0.00684407	0.0298643	0.0155684		TEX101	0.00114412	0.284411	0.00268566		MAGEA9B	0.033568	0.319583	0.0656637
DCAF12	4.8261e-05	0.134279	0.000125142		ODF2	0.00697951	0.0550094	0.0157039		POTEG	0.00121575	0.232483	0.00279498		MAGEA2	0.0357678	0.345299	0.0693584
IGSF11	6.19117e-05	0.35551	0.00015689		IL13RA2	0.00737422	0.0328548	0.0164136		PAGE2	0.00121138	0.60532	0.00281394		GAGE12J	0.041588	0.191719	0.0799494
PRSS54	7.25039e-05	0.11983	0.000181667		FBXO39	0.00862551	0.0178008	0.0189945		GAGE4	0.00192191	0.505252	0.00437332		CT45A1	0.0459778	0.273146	0.0868903
SSX6	8.48724e-05	0.157953	0.000210295		CT47A7	0.0108652	0.0183143	0.023428		FTHL17	0.00210524	0.512895	0.0047421		SSX1	0.0478828	0.22753	0.0889822
TMEM108	9.08583e-05	0.487694	0.000222653		CTAG1B	0.0108638	0.0260024	0.0236717		CTAGE5	0.00220408	0.205068	0.00491509		ODF4	0.0490077	0.119922	0.09032
SPANXE	0.000153366	0.171369	0.000367748		TEX101	0.0119734	0.0222924	0.0255516		SLCO6A1	0.00236408	0.287954	0.0052197		GAGE1	0.0502522	0.212101	0.0918545
VENTXP1	0.000176926	0.0594631	0.000419728		CTCFL	0.0126484	0.0235147	0.0264467		FATE1	0.00328805	0.37679	0.00718859		POTEE	0.0528074	0.176135	0.0957402
SSX4	0.000181662	0.209322	0.000421985		PASD1	0.0126438	0.0217072	0.0267068		PAGE5	0.003527	0.42508	0.00763612		DDX53	0.0612333	0.125404	0.10924
SPAG4	0.000181449	0.319858	0.000425928		SSX6	0.0171017	0.0180816	0.0350501		CCDC83	0.00431366	0.341736	0.00924948		GAGE2A	0.0659646	0.137227	0.116747
CT45A5	0.000220487	0.304666	0.000506893		DPPA2	0.0183061	0.0160811	0.0371506		CTAG1B	0.00471086	0.771341	0.00981797		FMR1NB	0.0776028	0.134514	0.136263
SPANXN5	0.000245991	0.0774731	0.000554101		CTAG1A	0.0195391	0.0162787	0.0388903		FMR1NB	0.00467152	0.308915	0.00982781		SPACA3	0.085413	0.0686912	0.148805
SSX9	0.000306558	0.0686501	0.000683624		CXorf48	0.0228869	0.015934	0.04512		XAGE2	0.00529795	0.63582	0.0109393		GAGE8	0.0901225	0.0858275	0.155793
CTAG2	0.000360379	0.39129	0.000787887		CT45A5	0.0272134	0.0372643	0.0531431		CXorf48	0.00642669	0.236456	0.0131482		CT45A3	0.0914799	0.168281	0.156923
POTEE	0.000371519	0.230175	0.000804357		PAGE1	0.0289678	0.0191246	0.0560406		CT45A3	0.00814612	0.360639	0.0163656		SPANXC	0.0953494	0.171873	0.162312
HORMAD2	0.000395183	0.10262	0.000839293		SPATA19	0.0366935	0.0156793	0.0703291		GAGE12D	0.00833729	0.428648	0.0166001		CT45A5	0.0987346	0.160696	0.166802
MAGEC1	0.000394509	0.440524	0.000845918		C15orf60	0.0382584	0.0135936	0.0726558		POTEC	0.00871799	0.198849	0.0172045		MAGEB6	0.0996087	0.0679215	0.167013
SYCP1	0.000430257	0.358631	0.000896705		SSX3	0.040174	0.020099	0.0756001		DPPA2	0.00976526	0.216835	0.0191022		C21orf99	0.103554	0.0742058	0.171056
PAGE1	0.000477549	0.171138	0.00098605		MAGEA8	0.0416493	0.049374	0.0776703		PRSS54	0.0105506	0.154243	0.0202827		PRM2	0.121338	0.0119954	0.198958
THEG	0.000508729	0.386478	0.00103133		XAGE3	0.0678442	0.0219109	0.123191		DDX53	0.0131199	0.204731	0.0245861		CT45A2	0.127065	0.13126	0.206828
AKAP3	0.000534896	0.302066	0.00107461		MAGEB4	0.0842994	0.0111891	0.151739		PTPN20A	0.0156727	0.187857	0.0288844		FTHL17	0.152057	0.114602	0.243948
PAGE2	0.000575685	0.344017	0.00114623		SSX1	0.0923276	0.0153962	0.161965		GAGE12J	0.0163835	0.312394	0.0297034		CT45A6	0.156137	0.114745	0.248704
MAGEB3	0.000589719	0.0841344	0.00116378		FMR1NB	0.112884	0.0178129	0.193115		PASD1	0.0163011	0.20371	0.0297962		ARX	0.164242	0.320635	0.259758
CT47B1	0.000684689	0.0440995	0.00133935		GAGE1	0.123589	0.0100815	0.209697		CTAG2	0.0166349	0.487812	0.0299159		CT45A4	0.182958	0.115167	0.287321
CT45A1	0.00115407	0.367722	0.00219964		PTPN20A	0.153394	0.0325224	0.256069		MAGEB3	0.0186102	0.11294	0.0326778		TEX101	0.185742	0.0625316	0.289654
CALR3	0.00132629	0.136083	0.0024854		TMPRSS12	0.155033	0.0127757	0.256735		CT45A2	0.0184953	0.206607	0.0327337		MAGEA4	0.200911	0.208941	0.308987
TPTE	0.00132322	0.287838	0.00250066		NR6A1	0.158183	0.0095889	0.259872		SPANXC	0.0203601	0.308437	0.0354712		SPANXN1	0.219331	0.00829299	0.330478
TULP2	0.00136991	0.136106	0.00254576		SPANXN5	0.188169	0.0082373	0.306701		GAGE2A	0.0210762	0.202448	0.0364341		CTCFL	0.236064	0.0746289	0.353304
IL13RA2	0.00172911	0.30406	0.00316059		ADAM29	0.204358	0.0102197	0.327924		BAGE	0.0222221	0.247301	0.0381195		C15orf60	0.238179	0.0281352	0.354093
CXorf48	0.00246074	0.15977	0.00446135		MAGEB5	0.231325	0.00713529	0.368341		SPA17	0.0254779	0.253028	0.0433707		SPANXA2	0.24355	0.137151	0.357313
SPATA19	0.00304656	0.0396882	0.00547889		SLCO6A1	0.264629	0.00840937	0.402781		CT45A4	0.027659	0.196428	0.0463756		OTOA	0.247247	0.122729	0.358026
SSX7	0.00343017	0.01939	0.00607085		CCDC33	0.259657	0.0074972	0.404128		SSX4	0.0286238	0.232827	0.0476352		MAGEB3	0.243311	0.0288055	0.359326
PAGE2B	0.00340336	0.279345	0.0060716		TULP2	0.263614	0.0081508	0.404208		NXF2	0.0292034	0.298896	0.0482397		PRSS54	0.252208	0.0344132	0.362854
XAGE3	0.0044822	0.125009	0.0077483		ODF4	0.262155	0.00845391	0.404971		LEMD1	0.0313315	0.5852	0.0513744		BAGE	0.26564	0.0831765	0.377311
MORC1	0.00562003	0.117699	0.00956692		FAM46D	0.270143	0.00750982	0.405214		SSX3	0.038515	0.173005	0.061349		CTNNA2	0.267537	0.181373	0.377599
MAGEC2	0.00586134	0.406768	0.00982765		IGSF11	0.281281	0.0123166	0.418886		ODF4	0.0383935	0.144178	0.0615953		CT47B1	0.270827	0.00731163	0.379839
MAEL	0.00605579	0.338335	0.0100779		MAGEB3	0.318155	0.00908438	0.457348		SPANXE	0.0426792	0.182233	0.0674997		GAGE13	0.277185	0.0378566	0.381557
FMR1NB	0.00620379	0.174401	0.0102477		CTAGE5	0.324411	0.0107065	0.459952		CT45A6	0.0447975	0.172816	0.070351		CXorf48	0.275573	0.0766858	0.381695
SPINLW1	0.0069074	0.199784	0.0113261		NXF2B	0.359423	0.00661581	0.499333		C21orf99	0.0458644	0.086684	0.0715228		DPPA2	0.274785	0.0437202	0.382982
BAGE	0.00804497	0.164124	0.0129067		CAGE1	0.367421	0.00664856	0.507041		PAGE1	0.0464823	0.211961	0.0719829		PAGE1	0.280277	0.040823	0.383446
PRSS55	0.00852157	0.0841666	0.0135736		POTED	0.391051	0.0057064	0.529069		SPACA3	0.048345	0.104919	0.0743513		ODF1	0.299653	0.0373869	0.407456
ZNF165	0.00900332	0.157188	0.0142393		PAGE3	0.398408	0.00509133	0.532067		GAGE1	0.0492559	0.235145	0.0752334		SSX7	0.309955	0.00642661	0.416385
XAGE1D	0.0113217	0.396582	0.0176555		HSPB9	0.413323	0.00591896	0.548447		SSX7	0.051622	0.0258166	0.0767447		CPXCR1	0.316065	0.0200927	0.419539
GAGE13	0.0160744	0.0971062	0.0247212		CPXCR1	0.45447	0.00512639	0.595413		GAGE8	0.0510515	0.148772	0.0769222		ADAM2	0.332017	0.123272	0.435529
PAGE5	0.0187853	0.198362	0.0286926		TDRD6	0.461031	0.00680079	0.600211		CPXCR1	0.0586453	0.0532847	0.0860388		SPANXN2	0.341703	0.00584579	0.445613
CT45A3	0.019074	0.192358	0.0287399		MORC1	0.505047	0.00459412	0.641378		POTEB	0.0718586	0.05611	0.104055		LDHC	0.378891	0.180236	0.485591
DSCR8	0.0190601	0.261622	0.0289142		NLRP4	0.530829	0.00430146	0.67001		TEX14	0.0825538	0.344642	0.11801		NLRP4	0.397036	0.0731522	0.503062
NR6A1	0.0239957	0.229445	0.035913		SPACA3	0.585237	0.00451383	0.729783		SPANXA2	0.0845527	0.244567	0.120097		DKKL1	0.449887	0.109783	0.560473
SEMG1	0.032845	0.0827496	0.0485062		SPANXN3	0.609952	0.00342458	0.756048		FAM46D	0.0873916	0.194478	0.123344		PRM1	0.454498	0.00341924	0.563073
CT47A1	0.0374536	0.0107405	0.0545892		TPPP2	0.620043	0.00319068	0.759461		CT47B1	0.0902949	0.0514112	0.12664		CTAG2	0.461327	0.0965217	0.568375
CPXCR1	0.0430576	0.033192	0.0619474		ODF1	0.619025	0.00295486	0.762727		IMP3	0.10477	0.0883362	0.145116		SAGE1	0.490647	0.057907	0.594643
GAGE4	0.0569668	0.190742	0.0809146		CTNNA2	0.668906	0.00491154	0.80502		SSX9	0.105681	0.0702354	0.145474		PAGE3	0.488006	0.00770947	0.594674
MAGEB2	0.0682242	0.151415	0.0962911		TSPY3	0.685556	0.00250458	0.815576		GAGE13	0.110146	0.134963	0.150691		GAGE12F	0.487463	0.00247809	0.597276
SPANXC	0.0841838	0.136564	0.118069		MAGEB1	0.696095	0.00310353	0.818703		SPANXN5	0.112287	0.0804679	0.152683		MAGEA10	0.496388	0.0513023	0.598348
SSX5	0.0866046	0.0447495	0.120705		PRM2	0.713053	0.00236493	0.833909		SEMG1	0.128461	0.102551	0.172571		HORMAD1	0.539297	0.116908	0.639698
GAGE12J	0.120885	0.120675	0.166403		CT45A2	0.721197	0.00253629	0.838695		SSX6	0.141485	0.112472	0.18893		SPANXN4	0.572131	0.00163841	0.664506
DDX53	0.127946	0.0793272	0.175042		PIWIL1	0.726106	0.00216574	0.839687		SPATA19	0.149081	0.0387738	0.196716		TSPY2	0.576225	0.00419503	0.665794
CT47A7	0.134407	0.0137942	0.180559		TFDP3	0.74883	0.00186733	0.856397		VENTXP1	0.151213	0.0494868	0.198355		SSX3	0.584916	0.014909	0.668904
SAGE1	0.135999	0.0974615	0.181603		PRSS55	0.764569	0.00224634	0.86484		SPANXN1	0.162113	0.0156334	0.210182		TSPY1	0.58263	0.00644548	0.669724
CT47A6	0.134407	0.0124432	0.181653		CT47A1	0.811594	0.0016143	0.898395		SAGE1	0.18106	0.155368	0.233389		SPO11	0.629093	0.00357972	0.71212
CT47A11	0.134407	0.00108315	0.18276		MAGEB6	0.817026	0.00163045	0.899597		MAGEB2	0.205452	0.181486	0.263309		SEMG1	0.669559	0.0198014	0.754099
DDX43	0.142021	0.178175	0.188516		SPANXB1	0.800326	0.00197306	0.900367		C15orf60	0.247568	0.0274654	0.315472		TSPY3	0.684469	0.00117923	0.759386
GAGE8	0.14901	0.0629444	0.196623		ARX	0.828616	0.00289981	0.907531		POTEH	0.25352	0.0854352	0.321222		CT47A2	0.684469	0.0038395	0.763183
PRM1	0.167738	0.0278354	0.218747		DDX53	0.835225	0.00133135	0.909956		CTNNA2	0.259892	0.233651	0.327435		MAGEA8	0.700477	0.0472776	0.765718
GAGE12F	0.167242	0.00869787	0.219382		KDM5B	0.874078	0.00448376	0.923133		NR6A1	0.295043	0.15207	0.367568		SSX4	0.700055	0.0235051	0.769026
FBXO39	0.204004	0.10626	0.262965		KIAA0100	0.866305	0.00269851	0.924356		MAGEA8	0.33698	0.150085	0.415174		LIPI	0.720208	0.0234107	0.775876
CT45A4	0.202936	0.0812609	0.263108		PRM1	0.871937	0.000945695	0.925595		ELOVL4	0.341792	0.151508	0.41879		SPANXN5	0.718584	0.00299486	0.777885
SPO11	0.206076	0.00909545	0.264109		CT47A6	0.859044	0.00125934	0.926156		PAGE3	0.371279	0.0221355	0.452433		MAGEB2	0.76968	0.030071	0.821238
GAGE12D	0.209975	0.128577	0.266048		GPAT2	0.895238	0.0018399	0.931227		SPO11	0.380739	0.0126752	0.461439		PASD1	0.804319	0.0089331	0.850062
SPANXA2	0.217156	0.107417	0.273592		SPO11	0.89198	0.00108554	0.932524		SPANXN2	0.389507	0.00273886	0.469513		SPANXE	0.835698	0.0108642	0.879059
SPANXN1	0.230482	0.00734044	0.28875		AKAP4	0.916959	0.000761912	0.935027		CT47A1	0.397874	0.0107405	0.477021		NXF2B	0.862907	0.00349634	0.899197
PAGE3	0.233871	0.014426	0.28974		FANCA	0.92833	0.000688488	0.941982		ARX	0.411696	0.187181	0.490953		SSX9	0.89981	0.00158528	0.92897
CT45A2	0.233337	0.0753474	0.290694		MAGEA11	0.942723	0.000864489	0.947299		PRM2	0.426398	0.0182353	0.50578		CT47A1	NaN	0	NaN
SPACA3	0.246738	0.0362281	0.303992		MAGEC3	0.940169	0.000541361	0.949342		CTAGE1	0.432326	0.0701435	0.510099		CT47A10	NaN	0	NaN
GAGE2A	0.257947	0.0652217	0.316056		PAGE5	0.985354	0.000132249	0.985354		GAGE12F	0.442599	0.011176	0.519472		CT47A11	NaN	0	NaN
SPAG9	0.261124	0.052304	0.3182		RGS22	7.4087e-70	-0.679441	3.0672e-68		NXF2B	0.497702	0.0167593	0.575065		CT47A6	NaN	0	NaN
MAGEA8	0.274434	0.102808	0.332602		LYPD6B	6.74738e-61	-0.820688	2.32785e-59		XAGE5	0.506366	0.0638537	0.58206		CT47A7	NaN	0	NaN
POTEA	0.276221	0.0050028	0.332958		SPAG6	3.34692e-29	-0.499348	4.33007e-28		PRM1	0.525332	0.0312547	0.600765		CT47A9	NaN	0	NaN
HEMGN	0.319534	0.0491966	0.381049		POTEC	1.14721e-27	-0.202129	1.31929e-26		CT47A7	0.543179	0.0137942	0.605644		CCDC36	5.78746e-61	-1.99148	1.434e-59
CT45A6	0.335914	0.0580707	0.398452		SEMG1	7.10115e-21	-0.127289	6.68154e-20		XAGE1D	0.533683	0.165992	0.607201		ROPN1	5.92131e-57	-3.96769	1.20041e-55
PAGE4	0.369699	0.0282424	0.427165		SPA17	7.49124e-21	-0.290719	6.74212e-20		CT47A6	0.543179	0.0124432	0.608688		TDRD6	1.51228e-55	-2.01371	2.81032e-54
NXF2B	0.378123	0.013263	0.434646		TSGA10	3.11851e-20	-0.121388	2.68972e-19		MAGEB4	0.555996	0.133647	0.610774		TMEFF2	1.30305e-46	-0.924542	2.23523e-45
RNF17	0.397751	0.0423758	0.452543		IMP3	3.79234e-19	-0.16126	2.90746e-18		CT47A2	0.543179	0.0107031	0.611762		TPPP2	3.65779e-45	-0.721499	5.09804e-44
PTPN20A	0.400663	0.0410263	0.453542		CEP290	1.36041e-18	-0.144394	1.00573e-17		THEG	0.554573	0.107652	0.612227		PIWIL2	5.25542e-41	-2.12386	6.51088e-40
TMEFF2	0.437827	0.0301065	0.488177		SPAG17	4.82138e-15	-0.0692047	3.02432e-14		CT47A11	0.543179	0.00108315	0.614867		SYCE1	9.66343e-34	-2.49279	1.07747e-32
CT47A2	0.454385	0.00686361	0.499152		C21orf99	1.32044e-13	-0.0637838	7.19293e-13		ADAM2	0.662865	0.0497089	0.714101		TULP2	4.24138e-33	-0.737815	4.50394e-32
POTEG	0.451761	0.0320914	0.501208		SPAG8	7.81961e-13	-0.111843	4.04665e-12		ODF1	0.77251	0.00766571	0.820332		RBM46	1.72227e-32	-0.948679	1.74575e-31
PRM2	0.549687	0.00623984	0.592175		POTEB	5.99438e-11	-0.0856957	2.95438e-10		TPTE	0.867234	0.0263137	0.903707		ANKRD45	7.26106e-27	-1.23874	6.47687e-26
ODF4	0.587257	0.0242557	0.629607		GPATCH2	1.67144e-10	-0.194007	7.86336e-10		SSX5	0.960077	0.00196292	0.986623		XAGE3	2.16598e-26	-0.581959	1.85774e-25
KDM5B	0.632421	0.0215792	0.674784		PRSS50	8.12484e-10	-0.0698105	3.73743e-09		CRISP2	0.958108	0.0102089	0.989158		HORMAD2	4.74365e-25	-0.464838	3.9179e-24
CTNNA2	0.680099	0.0522776	0.722201		CCDC110	1.4771e-09	-0.0908363	6.50552e-09		CT47A10	NaN	0	NaN		TMPRSS12	2.88441e-24	-0.609145	2.29723e-23
C21orf99	0.697493	0.0124782	0.73716		CABYR	1.75189e-08	-0.192936	7.25281e-08		CT47A9	NaN	0	NaN		MAGEB4	7.62929e-24	-1.11538	5.67111e-23
ODF3	0.740157	0.0100074	0.774906		POTEG	1.30345e-07	-0.0540137	5.18872e-07		SPANXN4	NaN	0	NaN		AKAP3	1.22282e-23	-1.20491	8.79639e-23
GAGE1	0.77808	0.0230442	0.810803		TEX14	1.87757e-06	-0.140843	6.81853e-06		TSPY1	NaN	0	NaN		DDX43	7.48661e-22	-1.63164	5.21723e-21
PIWIL1	0.84633	0.00895369	0.877821		SPEF2	2.15722e-06	-0.0527928	7.69904e-06		TSPY2	NaN	0	NaN		PRSS55	1.73862e-15	-0.365833	1.10775e-14
ODF2	0.904058	0.004113	0.933356		POTEE	1.64157e-05	-0.0319998	5.39373e-05		TSPY3	NaN	0	NaN		SPAG9	5.53639e-14	-0.487406	3.24899e-13
ZNF645	0.945377	0.000807102	0.96706		BRDT	0.000448214	-0.0766632	0.00127096		CCDC36	1.34693e-58	-2.2343	3.00366e-57		LEMD1	2.75979e-12	-1.03701	1.50106e-11
CT47A10	NaN	0	NaN		CCDC62	0.00046429	-0.0290911	0.00129876		PIWIL2	7.3461e-39	-2.45868	1.26014e-37		LY6K	2.72732e-12	-1.56339	1.52048e-11
CT47A9	NaN	0	NaN		TPTE	0.000915398	-0.0267968	0.00242932		RGS22	3.90872e-33	-3.01254	5.44778e-32		PRSS50	2.15794e-11	-1.24457	1.11912e-10
SPEF2	2.04395e-58	-1.23499	4.55801e-56		PRSS54	0.00413065	-0.0169823	0.00971641		SYCE1	3.48668e-32	-2.78918	4.57371e-31		GPAT2	1.38261e-10	-1.2499	6.85159e-10
RGS22	3.61718e-55	-2.77504	2.68877e-53		SYCE1	0.0132612	-0.0496104	0.0274506		TDRD6	3.02943e-26	-1.45221	3.55559e-25		IGSF11	1.0885e-09	-0.72912	5.16457e-09
LYPD6B	3.37842e-34	-1.67446	6.84898e-33		SPANXN4	0.0194438	-0.0148576	0.0390765		TMEFF2	1.07147e-21	-0.894436	1.03886e-20		XAGE5	1.50559e-09	-0.107303	6.85195e-09
SPAG8	5.9174e-21	-0.811153	6.28371e-20		CTAGE1	0.0596547	-0.0123236	0.110255		TSGA10	1.92672e-20	-0.916567	1.79024e-19		NOL4	1.77224e-09	-1.04021	7.90419e-09
CEP290	9.12225e-21	-0.477952	9.24664e-20		SPAG1	0.0655252	-0.0420358	0.120033		PRSS50	9.47577e-18	-1.71038	8.12729e-17		TDRD1	6.69194e-08	-1.18144	2.81567e-07
TSGA10	1.75785e-15	-0.484574	1.12e-14		HEMGN	0.0856254	-0.0116264	0.152797		SPAG8	5.1922e-16	-1.05832	4.28837e-15		CCNA1	2.58193e-07	-0.786612	1.02816e-06
POTED	3.2846e-12	-0.408713	1.70341e-11		PAGE4	0.0901865	-0.0196108	0.159561		TPPP2	8.50374e-14	-0.573777	6.77262e-13		CRISP2	2.8013e-07	-0.700917	1.09595e-06
SPAG6	7.86781e-12	-1.44624	3.65526e-11		PIWIL2	0.102285	-0.0310905	0.176442		TULP2	1.56878e-13	-0.601709	1.16613e-12		TSGA10	2.89131e-07	-0.431993	1.11166e-06
POTEH	1.5639e-09	-0.333107	6.22767e-09		PLAC1	0.101881	-0.0332613	0.177221		SPAG6	2.05166e-13	-1.77551	1.47587e-12		SPINLW1	4.50341e-06	-0.455864	1.56916e-05
SPAG17	4.11977e-09	-1.04942	1.61177e-08		POTEA	0.150654	-0.0127201	0.25354		GPAT2	5.68269e-13	-1.46396	3.84012e-12		ELOVL4	4.65905e-06	-0.57178	1.59841e-05
SPA17	1.61921e-08	-0.40416	6.22559e-08		SPANXN1	0.200291	-0.00771466	0.323907		SPEF2	1.33307e-12	-0.910598	8.25764e-12		TMEM108	5.28797e-06	-0.764498	1.78669e-05
POTEC	2.28079e-07	-0.506172	8.07326e-07		LIPI	0.237055	-0.0120428	0.374583		DDX43	1.7912e-11	-1.45347	9.98596e-11		BAGE2	8.31982e-06	-0.575275	2.68887e-05
POTEB	5.36947e-07	-0.184229	1.81423e-06		SPANXA2	0.250718	-0.050092	0.393172		COX6B2	6.82184e-11	-1.14644	3.45743e-10		MORC1	9.03839e-06	-0.181725	2.87937e-05
GPATCH2	5.30123e-07	-0.267115	1.81873e-06		SSX5	0.267789	-0.00811172	0.404616		AKAP3	1.77403e-10	-0.90284	8.79131e-10		COX6B2	4.6859e-05	-0.785836	0.000135709
PLAC1	1.50542e-06	-0.579043	4.79585e-06		TSSK6	0.302768	-0.00673906	0.441359		CEP290	2.76569e-10	-0.517764	1.31223e-09		IL13RA2	9.01467e-05	-0.495237	0.000254465
ARMC3	2.69442e-06	-0.70862	8.2309e-06		AKAP3	0.30108	-0.00828555	0.442011		SPAG9	6.47067e-09	-0.435102	2.82933e-08		MAGEA5	0.000475394	-0.153298	0.00124721
ADAM29	9.70401e-06	-0.512303	2.81038e-05		LUZP4	0.29931	-0.00639981	0.442551		ROPN1	3.99546e-08	-2.05517	1.59105e-07		SYCP1	0.000494508	-0.488165	0.00128227
BRDT	9.60381e-06	-0.54	2.81796e-05		SPANXB2	0.309141	-0.0480801	0.447498		SPAG17	6.84206e-08	-1.26251	2.6768e-07		HEMGN	0.000635506	-0.246833	0.00162894
TEX14	2.99723e-05	-0.582936	8.05279e-05		MAGEA1	0.324141	-0.0281368	0.462739		HORMAD2	4.2854e-07	-0.362218	1.54136e-06		MAGEC3	0.000739868	-0.287832	0.00185383
CCDC83	5.01039e-05	-0.331086	0.000128427		SSX7	0.342018	-0.0068237	0.481617		PRSS55	5.26204e-06	-0.281666	1.67633e-05		RNF17	0.00083485	-0.269375	0.00206857
CCDC110	0.000114633	-0.293173	0.00027786		XAGE5	0.344656	-0.00615039	0.482053		RBM46	1.32094e-05	-0.615742	4.09125e-05		CCDC62	0.000992483	-0.272316	0.00237983
PRSS50	0.000239481	-0.465809	0.000544942		SPANXC	0.37309	-0.022826	0.508089		CCDC62	2.17462e-05	-0.424498	6.55326e-05		FBXO39	0.00211407	-0.358531	0.00501529
CABYR	0.0003367	-0.278196	0.000743408		TSPY2	0.37099	-0.0072294	0.508576		XAGE3	3.32676e-05	-0.45695	9.89157e-05		ZNF645	0.0146814	-0.0472877	0.031786
IMP3	0.000413492	-0.118047	0.000869895		GAGE7	0.393925	-0.0143449	0.529497		ADAM29	6.58807e-05	-0.558108	0.000185967		FAM133A	0.0175406	-0.309577	0.0369015
SPAG1	0.000499001	-0.219981	0.00102089		SPANXD	0.432473	-0.0236429	0.570204		BAGE2	8.33193e-05	-0.575838	0.000226588		TPTE	0.0210034	-0.261524	0.0433681
CTAGE1	0.000818828	-0.182135	0.00158781		HORMAD2	0.470517	-0.00490786	0.608731		MAGEC3	0.00111456	-0.290395	0.00267255		MAGEB1	0.0227931	-0.225605	0.0462079
CCDC36	0.000922045	-0.242815	0.00177255		ZNF645	0.477055	-0.0046767	0.613356		KIAA0100	0.00455346	-0.223392	0.00967068		SPAG8	0.0314204	-0.247162	0.0620066
PIWIL2	0.00139864	-0.33482	0.00257766		RBM46	0.498368	-0.00423745	0.636804		CCDC110	0.0071406	-0.329465	0.014476		CCDC33	0.0447656	-0.16927	0.0853224
CTAGE5	0.00362736	-0.117706	0.00636929		CCDC36	0.57736	-0.00458209	0.724324		CCDC33	0.0099571	-0.211781	0.0193081		AKAP4	0.047153	-0.0439723	0.0883623
TSSK6	0.00401048	-0.178165	0.006987		SPANXN2	0.652553	-0.00318309	0.79458		RNF17	0.010892	-0.226999	0.02076		THEG	0.0584141	-0.278826	0.105051
COX6B2	0.00468503	-0.360604	0.00803663		RNF17	0.661635	-0.00273856	0.800926		IGSF11	0.0121499	-0.37361	0.0229612		ODF3	0.100797	-0.0742221	0.167743
NLRP4	0.00573949	-0.158332	0.00969626		OTOA	0.688595	-0.0026614	0.81451		HEMGN	0.0152065	-0.197636	0.0282588		HSPB9	0.137941	-0.159583	0.222905
OTOA	0.00697207	-0.194556	0.0113487		TMEFF2	0.683751	-0.00357464	0.81813		AKAP4	0.0182185	-0.0538798	0.0325017		POTEA	0.20004	-0.00712558	0.309784
KIAA0100	0.00709991	-0.139013	0.011473		MAGEB2	0.730153	-0.00306484	0.839676		ANKRD45	0.0258126	-0.367563	0.0436076		PAGE4	0.212103	-0.0428522	0.323965
CCDC62	0.0106792	-0.152182	0.0167709		DNAJB8	0.753287	-0.0026373	0.856761		LYPD6B	0.0331802	-0.513436	0.0540086		KIAA0100	0.219033	-0.0843791	0.332274
TFDP3	0.0129168	-0.312049	0.0200031		POTEH	0.80068	-0.00175045	0.895896		ZNF645	0.0365754	-0.0464806	0.0591038		SSX5	0.245685	-0.0427866	0.35809
SYCE1	0.0268244	-0.296385	0.039879		ADAM2	0.80692	-0.00297812	0.898024		DNAJB8	0.0495042	-0.028317	0.0750983		XAGE1D	0.264008	-0.23059	0.377395
SPANXB2	0.0373422	-0.199678	0.0547849		TSPY1	0.841466	-0.00124297	0.911956		FAM133A	0.0515792	-0.376356	0.0771957		SPAG6	0.307398	-0.329272	0.415454
TEKT5	0.0397731	-0.170025	0.0575935		CALR3	0.880598	-0.000964944	0.925298		FBXO39	0.0573071	-0.252272	0.0846323		FAM46D	0.313108	-0.0855594	0.418102
DNAJB8	0.0568306	-0.0188933	0.0812387		CCDC83	0.895409	-0.00130238	0.926748		SPINLW1	0.0693784	-0.25608	0.10112		RGS22	0.326311	-0.237507	0.430576
GPAT2	0.115923	-0.214055	0.160564		SSX2	0.86608	-0.00104463	0.928905		TFDP3	0.0748302	-0.340963	0.107659		XAGE2	0.342196	-0.08347	0.443661
ODF1	0.208703	-0.0297212	0.265947		TEKT5	0.912674	-0.000643972	0.935265		HSPB9	0.0978952	-0.18552	0.136441		SSX6	0.362173	-0.0454807	0.466847
LIPI	0.296958	-0.0471936	0.35603		SAGE1	0.911683	-0.00084607	0.938898		TMPRSS12	0.112901	-0.157175	0.152588		TEX15	0.382387	-0.105027	0.487271
SPANXN4	0.353505	-0.00163841	0.417098							TMEM108	0.142189	-0.276804	0.188739		SPAG17	0.40939	-0.213087	0.515786
ACRBP	0.359587	-0.0589522	0.419832							ODF3	0.156341	-0.0642146	0.203884		SLCO6A1	0.444473	-0.031068	0.55684
TSPY2	0.358647	-0.00419503	0.420938							IL13RA2	0.277311	-0.191178	0.347418		CAGE1	0.50256	-0.0455254	0.602531
TSPY1	0.36675	-0.00644548	0.425965							NLRP4	0.300389	-0.08518	0.372148		VENTXP1	0.506101	-0.0099763	0.603532
ADAM2	0.38841	-0.0735628	0.444182							SYCP1	0.460507	-0.129534	0.53766		DNAJB8	0.552129	-0.00942369	0.651454
ARX	0.400908	-0.133454	0.451528							MORC1	0.485094	-0.0640262	0.563417		CTAG1B	0.568263	-0.0734051	0.66347
SPANXN2	0.432614	-0.00310693	0.484789							OTOA	0.553104	-0.0718273	0.613643		CEP290	0.566268	-0.0398121	0.664619
AKAP4	0.452078	-0.0099075	0.499076							NOL4	0.605944	-0.117905	0.66238		NR6A1	0.603137	-0.0773744	0.686222
CCDC33	0.465203	-0.0425111	0.50853							LY6K	0.628839	-0.122666	0.684054		CXorf61	0.674999	-0.0629499	0.756406
TSPY3	0.504478	-0.00117923	0.548774							TDRD1	0.63538	-0.156321	0.687814		TMEFF1	0.686664	-0.0378571	0.75805
FAM133A	0.53576	-0.0667789	0.579973							LIPI	0.727196	-0.0237829	0.779638		FATE1	0.70682	-0.0409619	0.768882
HSPB9	0.732279	-0.025937	0.770274							BRDT	0.754288	-0.052467	0.804814		CCDC110	0.73716	-0.0362913	0.790321
MAGEA1	0.936012	-0.0137739	0.961892							PAGE4	0.821227	-0.0146098	0.859782		ADAM29	0.802485	-0.045805	0.852163
C15orf60	0.967529	-0.000669881	0.980723							POTED	0.818488	-0.0116889	0.860957		NXF2	0.838696	-0.00966722	0.878071
MAGEC3	0.965432	-0.00256351	0.983066							POTEA	0.816432	-0.00212278	0.862864		TFDP3	0.872243	-0.0289149	0.904698
BAGE2	0.995024	-0.000562711	1.00403							CCNA1	0.952606	-0.0124155	0.988052		SPATA19	0.946625	-0.000914387	0.972799
ssGSEA score
CT gene-set
Comparison	wilcox.test P-value
TP53-mutated BCs vs.TP53-wildtype BCs (TCGA)	9.52e-35
TP53-mutated BCs vs.TP53-wildtype BCs (METABEIC)	9.45627e-24
TP53-mutated BCs vs. normal tissue	4.23e-53
TP53-wildtype BCs vs. normal tissue	1.80422e-51

## Sheet: Table S17
Table S17. Comparisons of the enrichment levels of the Treg signature between two classes of samples.
Treg genes
TP53 mutated vs. TP53 wildtype										TP53 mutated vs. normal tissue					TP53 wildtype vs. normal tissue
TCGA					METABRIC					TCGA					TCGA
Gene symbol	P-value	Log2(fold change)	FDR		Gene symbol	P-value	Log2(fold change)	FDR		Gene symbol	P-value	Log2(fold change)	FDR		Gene symbol	P-value	Log2(fold change)	FDR
IL12RB2	1.87883e-46	2.26974	1.31518e-44		TFRC	4.75492e-82	0.717031	2.9956e-80		IL21R	1.47394e-59	2.91745	5.1588e-58		CHRNA6	1.81792e-58	2.69355	4.24181e-57
CTSC	1.38147e-34	0.888607	3.22344e-33		CTLA4	1.87262e-69	0.518027	5.89876e-68		CCR8	9.75404e-49	2.67673	1.70696e-47		TNFRSF18	3.64817e-43	2.45882	3.19215e-42
LAPTM4B	2.28241e-33	1.01846	3.99421e-32		CTSC	4.18033e-60	0.717056	8.77869e-59		CHRNA6	1.53133e-37	2.0473	1.53133e-36		TMPRSS6	5.30682e-18	2.21503	1.28096e-17
TFRC	9.96824e-29	0.787631	1.39555e-27		NFE2L3	4.07283e-59	0.671031	6.41471e-58		LAPTM4B	2.73763e-33	1.50332	2.39543e-32		IL21R	1.11109e-39	2.15043	7.07059e-39
RNF145	3.11622e-25	0.714335	3.63559e-24		ICOS	8.90139e-59	0.488951	1.12158e-57		ETV7	4.44491e-32	2.08299	3.11143e-31		CCR8	3.41248e-28	1.79881	1.40514e-27
NETO2	3.58624e-24	1.03424	3.58624e-23		RNF145	1.0196e-55	0.477165	1.07058e-54		TNFRSF18	4.34374e-32	2.23796	3.37847e-31		CD177	1.0029e-11	1.76769	2.0648e-11
ADAT2	9.87057e-24	0.592428	8.63675e-23		IL21R	3.09987e-55	0.38624	2.78988e-54		TIGIT	3.61159e-31	2.16014	2.29828e-30		BATF	3.1421e-26	1.39107	1.09974e-25
CHST2	4.56926e-23	0.795701	3.55387e-22		LTA	9.23305e-48	0.416221	7.27102e-47		TFRC	3.88448e-30	1.32918	1.81276e-29		ETV7	4.54831e-22	1.3693	1.27353e-21
CTLA4	1.6803e-22	1.17886	1.17621e-21		LAPTM4B	6.00171e-45	0.755807	3.78108e-44		LTA	1.65131e-26	1.69716	5.50437e-26		TIGIT	3.59172e-09	1.11906	6.79515e-09
NFE2L3	1.89785e-22	0.780119	1.20772e-21		NETO2	5.49274e-41	0.544611	3.14584e-40		ICOS	5.94447e-25	1.92274	1.80919e-24		TNFRSF4	3.04363e-15	0.990812	7.10181e-15
IL1R2	5.43237e-21	1.15634	2.92512e-20		ETV7	6.52304e-41	0.209587	3.4246e-40		NFE2L3	1.63557e-24	1.37738	4.77043e-24		LTA	1.04807e-07	0.848992	1.78939e-07
ICOS	2.38072e-19	1.1592	1.19036e-18		TNFRSF4	1.64801e-39	0.368071	7.98649e-39		TNFRSF4	3.35331e-23	1.42323	8.69377e-23		ACP5	7.59561e-12	0.793482	1.66154e-11
HTATIP2	2.37823e-17	0.540179	1.04048e-16		IL1R2	9.38701e-38	0.290015	3.94254e-37		CTLA4	2.90024e-19	1.57794	7.00057e-19		ICOS	2.51931e-05	0.763534	3.75217e-05
FKBP1A	3.10746e-17	0.299023	1.27954e-16		SLC35F2	2.59668e-32	0.391247	1.02244e-31		SLC35F2	2.81816e-19	1.18496	7.04541e-19		SLC35F2	8.72915e-11	0.629479	1.74583e-10
TIGIT	1.77538e-15	1.04108	6.90426e-15		ACSL4	4.24721e-27	0.310209	1.57397e-26		HTATIP2	8.32807e-19	0.837185	1.94322e-18		VDR	9.65469e-12	0.61408	2.04796e-11
CCR8	1.01357e-14	0.877921	3.73419e-14		TIGIT	8.18335e-27	0.11868	2.86417e-26		NETO2	1.11145e-15	1.22602	2.4313e-15		NFE2L3	5.91036e-09	0.597265	1.06083e-08
LTA	2.31579e-14	0.848163	8.10528e-14		TRAF3	2.86088e-21	0.11802	8.58264e-21		VDR	1.00173e-11	0.742072	2.00347e-11		TFRC	5.77486e-09	0.54155	1.06379e-08
SLC35F2	2.19609e-13	0.555478	7.32031e-13		CASP1	2.95901e-19	0.312697	8.10511e-19		CD177	2.56526e-11	1.61585	4.85319e-11		LAPTM4B	2.76434e-05	0.484854	4.03133e-05
IL21R	1.3168e-12	0.767021	4.18982e-12		CD274	1.25018e-16	0.068289	3.28172e-16		GRSF1	4.32421e-11	0.363964	7.96564e-11		BCL2L1	9.27495e-25	0.477677	2.95112e-24
ETV7	4.00779e-12	0.713688	1.12218e-11		GCNT1	2.64173e-14	0.267781	6.65717e-14		ZNF282	2.19409e-10	0.366072	3.83965e-10		PTPRJ	9.45905e-09	0.461379	1.65533e-08
ACSL4	1.56059e-11	0.458119	3.90147e-11		VDR	1.36917e-09	0.0936925	3.31761e-09		ACP5	4.10863e-08	0.70571	6.68847e-08		CTLA4	0.0194227	0.39908	0.0247198
LAX1	2.33095e-08	0.711013	5.26344e-08		KSR1	1.10413e-08	0.0502126	2.31867e-08		BATF	7.17328e-08	0.881911	1.1412e-07		ZNF282	3.02446e-12	0.361226	6.82944e-12
ADPRH	1.62746e-07	0.249118	3.56007e-07		FKBP1A	1.85579e-08	0.196369	3.77144e-08		IL12RB2	1.74374e-06	1.22932	2.71249e-06		HTATIP2	0.00057727	0.297007	0.000808179
TNFRSF4	7.16913e-07	0.432422	1.52073e-06		CSF2RB	1.26036e-06	0.0338072	2.40615e-06		FKBP1A	2.88294e-06	0.275458	4.38709e-06		GRSF1	2.68222e-10	0.236942	5.21543e-10
CD274	1.48148e-06	0.44515	2.96296e-06		SSH1	9.52193e-06	0.0524362	1.71395e-05		BCL2L1	2.96403e-05	0.238365	4.32255e-05		NETO2	0.199003	0.191778	0.23217
CASP1	2.03299e-06	0.355258	3.95304e-06		ACP5	1.54321e-05	0.177831	2.70061e-05		PTPRJ	3.05401e-05	0.345829	4.36287e-05		TRAF3	0.0523619	0.100826	0.0654524
LY75	8.84212e-06	0.439747	1.67283e-05		PTPRJ	5.93852e-05	0.0316058	9.84544e-05		CTSC	0.000281311	0.406231	0.000386113		NPTN	0.836274	0.0111395	0.86087
SSTR3	1.38692e-05	0.2845	2.48935e-05		ZNF282	8.65058e-05	0.0697909	0.000136247		TRAF3	0.000407481	0.22883	0.000548532		ANKRD10	0.924201	0.00628771	0.924201
GRSF1	2.85301e-05	0.127022	4.99276e-05		NFAT5	9.76267e-05	0.105761	0.000150012		IL1R2	0.0409118	0.402152	0.0493763		METTL7A	5.04544e-101	-1.93608	3.53181e-99
CSF2RB	3.50852e-05	0.364246	5.99015e-05		THADA	0.000235775	0.0596027	0.000353662		SSTR3	0.0423656	0.218395	0.0502643		NFAT5	1.63868e-60	-1.13783	5.73537e-59
ERI1	0.00097927	0.15402	0.00152331		IL1R1	0.000921285	0.0557762	0.00134979		HS3ST3B1	0.0821623	0.214523	0.0927638		RNF145	9.02884e-54	-1.50672	1.58005e-52
TRAF3	0.00103772	0.128004	0.00157914		ADAT2	0.00277651	0.0209178	0.00380261		GCNT1	0.291993	0.148579	0.319368		ACSL4	1.0944e-49	-1.54813	1.53216e-48
NAB1	0.00143566	0.163001	0.00213822		LY75	0.0634461	0.0155966	0.0799421		LAX1	0.437583	0.15055	0.464103		NAB1	3.61627e-49	-1.08693	4.21898e-48
HS3ST3B1	0.00209745	0.265064	0.00305879		HS3ST3B1	0.0783724	0.0116378	0.096813		ERI1	0.484728	0.0482973	0.506432		CHST7	1.3972e-45	-1.21929	1.3972e-44
VDR	0.0118189	0.127991	0.0162221		TMEM184C	0.152403	0.0116828	0.184643		CD274	0.550083	0.0866962	0.566262		ADPRH	4.91304e-43	-0.973223	3.82126e-42
GCNT1	0.0206065	0.210037	0.0272161		CHST2	0.171432	0.0180019	0.203778		THADA	0.961335	0.00241659	0.961335		CHST2	6.19874e-40	-1.37651	4.33912e-39
KSR1	0.0858461	0.109559	0.100154		ERI1	0.187762	0.0123491	0.219056		METTL7A	2.05345e-63	-2.04427	1.43742e-61		KSR1	6.94592e-32	-1.01369	4.05179e-31
SSH1	0.106715	0.0561551	0.12246		IKZF2	0.248188	0.0110768	0.284288		SOCS2	8.43675e-57	-2.51239	1.96857e-55		LEPROT	1.5988e-30	-1.11045	8.60893e-30
CADM1	0.115382	0.125239	0.13027		ENTPD1	0.366116	0.0240704	0.404654		NFAT5	5.12752e-46	-1.17203	7.17853e-45		ZBTB38	6.6391e-30	-0.759289	3.09825e-29
IL1R1	0.190001	0.108283	0.211112		MAGEH1	0.500232	0.0133997	0.525244		CHST7	6.95049e-45	-1.28	8.10891e-44		JAK1	6.23159e-30	-0.677182	3.11579e-29
THADA	0.367848	0.0250692	0.390142		NAB1	0.587126	0.011899	0.606376		JAK1	7.63685e-31	-0.781263	4.45483e-30		SOCS2	7.08464e-29	-1.76879	3.09953e-28
ZNF282	0.892867	0.00484593	0.905807		LAYN	0.957785	0.00121802	0.957785		LIMA1	2.11986e-30	-1.22068	1.14146e-29		IL1R1	1.1686e-26	-1.35416	4.54457e-26
TMPRSS6	2.18751e-41	-2.46528	7.65629e-40		TMPRSS6	1.79716e-46	-0.539663	1.25801e-45		LEPROT	2.3223e-30	-1.28029	1.16115e-29		ADAT2	1.40757e-26	-0.879533	5.1858e-26
LIMA1	2.91237e-22	-0.55495	1.69888e-21		AHCYL1	5.19387e-38	-0.313122	2.33724e-37		IL1R1	4.2452e-29	-1.24588	1.85727e-28		LY75	2.56113e-25	-1.57432	8.53709e-25
HSDL2	2.18078e-17	-0.412633	1.0177e-16		RRAGB	3.81623e-26	-0.222473	1.26538e-25		ZBTB38	4.64848e-29	-0.927491	1.91408e-28		CSF1	1.22921e-24	-1.07428	3.74108e-24
AHCYL1	3.22776e-12	-0.264994	9.82363e-12		LIMA1	1.1907e-25	-0.288508	3.75071e-25		HSDL2	8.891e-29	-1.09226	3.45761e-28		CASP1	1.4721e-23	-1.06138	4.29362e-23
SOCS2	3.48351e-12	-0.743597	1.01602e-11		ANKRD10	2.39785e-19	-0.223272	6.86657e-19		ACSL4	2.20999e-27	-1.09002	8.14206e-27		LIMA1	7.46234e-21	-0.66573	2.00909e-20
BCL2L1	4.1523e-12	-0.239312	1.11793e-11		SOCS2	5.198e-09	-0.317978	1.21287e-08		NAB1	2.38543e-27	-0.923931	8.34901e-27		HSDL2	1.30534e-20	-0.679625	3.38421e-20
RRAGB	1.20088e-11	-0.275622	3.11339e-11		BCL2L1	6.97122e-09	-0.122178	1.56852e-08		CSF1	2.1822e-25	-1.21278	6.94335e-25		LAYN	2.66901e-20	-0.91743	6.67252e-20
CHRNA6	2.34634e-09	-0.646246	5.66357e-09		CHRNA6	7.4608e-09	-0.0533621	1.62079e-08		LAYN	4.5152e-24	-1.09284	1.26426e-23		IL12RB2	1.15928e-07	-1.04042	1.93214e-07
BATF	1.33709e-08	-0.509154	3.11989e-08		NPTN	4.90309e-07	-0.178984	9.65296e-07		ADPRH	8.59193e-24	-0.724105	2.31321e-23		SSH1	3.11672e-07	-0.251201	5.07373e-07
ANKRD10	1.4602e-06	-0.230669	3.0063e-06		TNFRSF18	3.25064e-06	-0.125724	6.02324e-06		KSR1	7.69623e-17	-0.904132	1.73786e-16		CTSC	6.86219e-07	-0.482375	1.09171e-06
NPTN	1.21148e-05	-0.172928	2.23168e-05		BATF	2.58027e-05	-0.140982	4.39344e-05		RNF145	4.72972e-15	-0.792386	1.00327e-14		IL1R2	2.22335e-06	-0.75419	3.45854e-06
TMEM184C	7.57277e-05	-0.146264	0.000126213		ZBTB38	8.37084e-05	-0.048761	0.000135221		LY75	1.73214e-13	-1.13458	3.56616e-13		CSF2RB	1.82146e-05	-0.525017	2.77178e-05
NDFIP2	0.000126593	-0.167219	0.000206082		CADM1	0.00108334	-0.136428	0.00155115		AHCYL1	2.23535e-11	-0.352358	4.3465e-11		TMEM184C	0.000188669	-0.183466	0.000269528
ZBTB38	0.000427846	-0.168202	0.000680663		CSF1	0.00112525	-0.0297801	0.00157535		CASP1	5.44012e-11	-0.70612	9.76431e-11		MAGEH1	0.00104154	-0.247897	0.00142956
LAYN	0.00974678	-0.175409	0.013924		NDFIP2	0.00461986	-0.06819	0.00619258		RRAGB	5.61768e-10	-0.423067	9.59115e-10		LAX1	0.00109654	-0.560463	0.00147611
JAK1	0.0116395	-0.104081	0.0162953		CD177	0.00571981	-0.0217803	0.00750725		TMEM184C	1.23705e-08	-0.32973	2.06175e-08		RRAGB	0.00345733	-0.147445	0.00456629
LEPROT	0.0121074	-0.169834	0.0162984		JAK1	0.0258297	-0.070471	0.0332096		CHST2	1.70576e-05	-0.580808	2.5405e-05		CD274	0.00381777	-0.358454	0.00494897
PTPRJ	0.0368554	-0.115551	0.0477756		ADPRH	0.306483	-0.0162086	0.344793		SSH1	0.000203728	-0.195046	0.00028522		ERI1	0.0972588	-0.105723	0.119441
IKZF2	0.0376739	-0.192465	0.0479486		GRSF1	0.387583	-0.0162767	0.41386		MAGEH1	0.000477317	-0.254446	0.000630418		AHCYL1	0.103076	-0.0873642	0.124403
CSF1	0.0569982	-0.138505	0.0712478		CHST7	0.387304	-0.0167674	0.420693		ANKRD10	0.000911611	-0.224381	0.00118172		CADM1	0.163295	-0.156337	0.19374
TNFRSF18	0.0618632	-0.220853	0.0746625		METTL7A	0.801311	-0.00708461	0.814235		ADAT2	0.00132322	-0.287105	0.0016841		NDFIP2	0.360801	-0.0531031	0.414034
ENTPD1	0.061676	-0.073325	0.0757424							NDFIP2	0.00141511	-0.220322	0.00176889		ENTPD1	0.483054	-0.0394461	0.536727
METTL7A	0.0733871	-0.108197	0.0870695							NPTN	0.00699294	-0.161789	0.00858782		SSTR3	0.475579	-0.0661047	0.536944
ACP5	0.261556	-0.0877722	0.286077							ENTPD1	0.0438625	-0.112771	0.0511729		THADA	0.503331	-0.0226527	0.550519
CHST7	0.267537	-0.0607193	0.288117							IKZF2	0.05745	-0.211483	0.0659262		GCNT1	0.630185	-0.0614586	0.668378
CD177	0.390899	-0.151841	0.408402							CSF2RB	0.232985	-0.160771	0.258872		FKBP1A	0.628358	-0.0235653	0.676694
NFAT5	0.451616	-0.0341969	0.464899							TMPRSS6	0.33101	-0.250241	0.356473		HS3ST3B1	0.680081	-0.0505412	0.710532
MAGEH1	0.90267	-0.00654875	0.90267							CADM1	0.78973	-0.0310978	0.801176		IKZF2	0.890054	-0.0190181	0.902953
ssGSEA score
Treg gene-set
Comparison	wilcox.test P-value
TP53-mutated BCs vs.TP53-wildtype BCs (TCGA)	2.57e-14
TP53-mutated BCs vs.TP53-wildtype BCs (METABRIC)	2.68553e-41
TP53-mutated BCs vs. normal tissue	0.150111
TP53-wildtype BCs vs. normal tissue	5.03027e-15

## Sheet: Table S18
Table S18. Comparisons of the enrichment levels of the immune checkpoint signature between two classes of samples.
Immune checkpoint genes
TP53 mutated vs. TP53 wildtype										TP53 muted vs. normal tissue					TP53 wildtype vs. normal tissue
TCGA					METABRIC					TCGA					TCGA
Gene symbol	P-value	Log2(fold change)	FDR		Gene symbol	P-value	Log2(fold change)	FDR		Gene symbol	P-value	Log2(fold change)	FDR		Gene symbol	P-value	Log2(fold change)	FDR
IDO1	2.04e-26	1.67391	9.59e-25		IDO1	9.66e-77	0.823117	4.25e-75		CD80	2.21545e-56	2.45746	5.2063e-55		TNFRSF18	3.65e-43	2.45882	4.29e-42
LAG3	1.65e-24	1.18966	3.87e-23		CTLA4	1.87e-69	0.518027	4.12e-68		TNFRSF9	4.18857e-51	2.77213	6.5621e-50		TNFSF4	3.09e-45	1.74628	4.85e-44
CTLA4	1.68e-22	1.17886	2.63e-21		LAG3	1.63e-65	0.638523	2.39e-64		TNFSF4	9.4562e-45	1.79267	8.88883e-44		TNFRSF9	2.43e-25	1.73193	1.14e-24
TNFRSF9	1.62e-19	1.04019	1.9e-18		ICOS	8.9e-59	0.488951	9.79e-58		CD276	1.56494e-41	0.961331	1.22587e-40		ADORA2A	1.37e-29	1.71777	7.18e-29
ICOS	2.38e-19	1.1592	2.24e-18		ICOSLG	8.52e-52	0.231392	7.5e-51		TNFRSF18	4.34374e-32	2.23796	2.91651e-31		CD80	9.6e-33	1.64613	5.64e-32
CD80	3.01e-18	0.811336	2.36e-17		TNFRSF4	1.65e-39	0.368071	1.21e-38		TIGIT	3.61159e-31	2.16014	2.12181e-30		TIGIT	3.59e-09	1.11906	8.44e-09
PDCD1LG2	5.97e-17	0.721806	4.01e-16		CD80	7.39e-39	0.143282	4.64e-38		ADORA2A	1.83867e-27	1.45267	8.64173e-27		TNFRSF4	3.04e-15	0.990812	9.54e-15
TIGIT	1.78e-15	1.04108	1.04e-14		TNFRSF9	1.9e-38	0.190824	1.05e-37		LAG3	2.062e-27	1.94724	8.81036e-27		PDCD1	3.49e-08	0.944036	7.8e-08
CD70	1.69e-12	0.705676	8.81e-12		PDCD1	3.71e-37	0.227621	1.81e-36		ICOS	5.94447e-25	1.92274	2.32825e-24		ICOS	2.52e-05	0.763534	4.39e-05
TNFSF9	2.64e-12	0.613647	1.24e-11		CD86	1.92e-34	0.398933	8.45e-34		TNFRSF4	3.35331e-23	1.42323	1.21235e-22		LAG3	1.52e-06	0.757583	2.86e-06
ICOSLG	7.38e-10	0.376945	3.15e-09		CD40	5.96e-32	0.279353	2.38e-31		CTLA4	2.90024e-19	1.57794	9.08741e-19		CD276	4.35e-37	0.755553	2.92e-36
KIR3DL1	1.3e-09	0.4196	5.11e-09		LGALS9	2.74e-30	0.350823	1.01e-29		PDCD1	6.12727e-19	1.67435	1.79989e-18		LGALS9	4.1e-08	0.55366	8.76e-08
CD86	1.59e-09	0.437735	5.76e-09		CD70	1.41e-27	0.148059	4.78e-27		CD86	7.6376e-17	0.94993	2.11157e-16		CD86	9.8e-07	0.512194	1.92e-06
PDCD1	2.46e-09	0.73031	8.27e-09		TIGIT	8.18e-27	0.11868	2.57e-26		IDO1	2.3037e-13	1.77778	5.41369e-13		CTLA4	0.0194227	0.39908	0.026082
LAIR1	1.47e-08	0.378367	4.62e-08		BTNL2	3.21e-26	0.110219	9.41e-26		LGALS9	2.2662e-13	0.849452	5.60586e-13		IDO2	0.000907294	0.376311	0.00137557
TNFRSF8	3.62e-08	0.505248	1.06e-07		CD27	4.84e-25	0.395112	1.33e-24		HAVCR2	2.09264e-10	0.66664	4.47065e-10		HAVCR2	9.68e-05	0.363469	0.000162509
TNFSF15	9.53e-08	0.599642	2.63e-07		BTLA	1.6e-22	0.174616	4.14e-22		IDO2	2.37689e-10	0.792829	4.85713e-10		CD70	0.110805	0.233857	0.137049
IDO2	3.38e-07	0.416519	8.36e-07		CD48	2.25e-22	0.452275	5.5e-22		ICOSLG	1.05853e-07	0.531769	1.99004e-07		CD27	0.20226	0.225435	0.231859
CD40	4.55e-07	0.352782	1.02e-06		TNFSF14	1.35e-17	0.129993	3.12e-17		CD70	1.9384e-07	0.939533	3.50404e-07		CD48	0.154281	0.194243	0.185929
CD276	4.48e-07	0.205778	1.05e-06		PDCD1LG2	7.96e-17	0.0904254	1.75e-16		CD27	7.19537e-06	0.813241	1.16615e-05		ICOSLG	0.0730442	0.154824	0.0927859
TNFSF14	7.23e-07	0.448461	1.48e-06		CD274	1.25e-16	0.068289	2.62e-16		TNFSF9	7.39879e-05	0.57702	0.000112175		IDO1	0.622114	0.103874	0.679985
TNFRSF4	7.17e-07	0.432422	1.53e-06		TNFRSF25	5.27e-15	0.26164	1.05e-14		CD48	0.000154588	0.523768	0.000220171		CD44	0.486146	0.0711631	0.54402
HHLA2	8.54e-07	0.253585	1.67e-06		LAIR1	6.98e-14	0.134309	1.34e-13		TMIGD2	0.00236763	0.423215	0.00317939		TMIGD2	0.645457	0.0586027	0.689466
CD274	1.48e-06	0.44515	2.68e-06		KIR3DL1	2.55e-13	0.070327	4.68e-13		HHLA2	0.0043071	0.267375	0.00562316		TNFSF18	0.805315	0.0246377	0.822822
CD244	1.48e-06	0.437223	2.78e-06		CD276	8.07e-11	0.169833	1.37e-10		TNFSF18	0.185176	0.160078	0.223161		HHLA2	0.837809	0.0137894	0.837809
HAVCR2	1.8e-06	0.303171	3.14e-06		CD28	1.18e-08	0.0600544	1.93e-08		BTLA	0.214335	0.225482	0.245701		C10orf54	3.84e-65	-1.84578	1.8e-63
CD27	2.06e-06	0.587806	3.45e-06		TNFSF4	3.24e-08	0.159024	5.09e-08		CD274	0.550083	0.0866962	0.574531		CD200	1.38e-53	-1.47855	3.25e-52
BTLA	2.98e-06	0.579622	4.84e-06		TNFRSF8	9.15e-08	0.0532381	1.39e-07		CD28	0.829838	0.0302151	0.847878		TNFRSF8	3.86e-41	-1.83819	3.63e-40
LGALS9	4.21e-05	0.295792	6.59e-05		CD40LG	4.18e-07	0.0577122	6.13e-07		TNFSF15	0.963439	0.00776722	0.963439		NRP1	3.44e-38	-1.13576	2.7e-37
TMIGD2	6.88e-05	0.364612	0.000104262		TNFSF9	4.75e-06	0.0406253	6.54e-06		C10orf54	1.39158e-58	-1.72828	6.54042e-57		PDCD1LG2	1.72e-23	-1.24731	7.35e-23
CD28	0.000177995	0.352166	0.00026143		IDO2	7.58e-06	0.0631078	1.01e-05		CD200	3.43898e-45	-1.49225	4.0408e-44		CD200R1	1.18e-18	-1.21679	4.61e-18
CD48	0.000624261	0.329525	0.000889099		CD160	2.6e-05	0.0456865	3.36e-05		NRP1	9.0549e-30	-1.14145	4.72867e-29		BTNL2	2.99e-18	-0.354324	1e-17
TNFRSF25	0.00106478	0.312797	0.0014719		CD244	7.76e-05	0.0277106	9.75e-05		TNFRSF8	1.02735e-20	-1.33294	3.44895e-20		CD40	2.77e-18	-0.855503	1e-17
CD40LG	0.00682502	0.33227	0.00916503		CD200R1	0.00307854	0.0346509	0.00366096		CD160	3.65906e-14	-0.776727	9.55422e-14		CD160	5.69e-15	-0.638889	1.67e-14
VTCN1	0.0204085	0.446029	0.0259243		VTCN1	0.00655969	0.259776	0.00759543		CD200R1	3.23658e-13	-1.06918	7.24377e-13		CD244	1.03e-14	-0.973588	2.86e-14
TNFSF18	0.055051	0.13544	0.0646849		TNFSF18	0.0377429	0.0158024	0.0425818		BTNL2	6.15533e-09	-0.306381	1.20542e-08		KIR3DL1	2.03e-11	-0.637154	5.3e-11
BTNL2	0.0754741	0.0479427	0.0844592		CD200	0.129861	0.0176157	0.142847		CD40	1.00557e-06	-0.502721	1.75043e-06		LAIR1	8.62e-11	-0.659663	2.13e-10
C10orf54	0.0810172	0.117501	0.0885536		TMIGD2	0.267352	0.00816096	0.286914		TNFRSF14	5.5599e-06	-0.433556	9.33268e-06		CD40LG	7.09e-07	-0.868358	1.45e-06
CD200R1	0.107982	0.147605	0.115344		ADORA2A	0.687346	0.0159315	0.703331		PDCD1LG2	1.35612e-05	-0.525505	2.12459e-05		TNFSF14	1.31e-05	-0.558504	2.38e-05
TNFSF4	0.55688	0.0463992	0.58163		TNFSF15	0.677875	0.00348711	0.710155		CD244	0.000141422	-0.536365	0.000207714		TNFSF15	0.000261151	-0.591875	0.000423244
TNFRSF14	1.04e-07	-0.323565	2.73e-07		TNFRSF14	2.68e-13	-0.20993	4.72e-13		CD40LG	0.00210336	-0.536088	0.00290759		TNFRSF25	0.00037532	-0.481433	0.000588002
ADORA2A	0.00823326	-0.265098	0.010749		TNFRSF18	3.25e-06	-0.125724	4.61e-06		LAIR1	0.0126158	-0.281296	0.0160255		CD274	0.00381777	-0.358454	0.00560736
CD160	0.0212279	-0.137838	0.0262556		CD44	0.000871257	-0.126473	0.00106487		KIR3DL1	0.075828	-0.217555	0.0937873		VTCN1	0.0133171	-0.744919	0.0189668
CD44	0.0266944	-0.160613	0.0321702		NRP1	0.766733	-0.0086314	0.766733		TNFRSF25	0.200478	-0.168636	0.235561		CD28	0.0179488	-0.321951	0.0248115
TNFRSF18	0.0618632	-0.220853	0.0709163							VTCN1	0.311539	-0.29889	0.348627		BTLA	0.0394401	-0.35414	0.0514912
CD200	0.830099	-0.0136915	0.848145							CD44	0.369343	-0.0894501	0.403701		TNFRSF14	0.182403	-0.109991	0.214323
NRP1	0.919739	-0.00569144	0.919739							TNFSF14	0.426053	-0.110044	0.455102		TNFSF9	0.776327	-0.0366271	0.810831
ssGSEA score
Immune checkpoint gene-set
Comparison	wilcox.test P-value
TP53-mutated BCs vs.TP53-wildtype BCs (TCGA)	4.36e-14
TP53-mutated BCs vs.TP53-wildtype BCs (METABEIC)	8.48882e-53
TP53-mutated BCs vs. normal tissue	2.71e-11
TP53-wildtype BCs vs. normal tissue	0.161568

## Sheet: Table S19
Table S19. Comparisons of the expression levels of the genes targeted by immunotherapy agents in clinical use or trials or in preclinical development between TP53-mutated and TP53-wildtyped BCs.
Genes targeted in clinical use or trials
TP53 mutated vs. TP53 wildtype										TP53 mutated vs. normal tissue					TP53 wildtype vs. normal tissue
TCGA					METABRIC					TCGA					TCGA
Gene symbol	P-value	Log2(fold change)	FDR		Gene symbol	P-value	Log2(fold change)	FDR		Gene symbol	P-value	Log2(fold change)	FDR		Gene symbol	P-value	Log2(fold change)	FDR
IDO1	2.03971e-26	1.67391	5.30324e-25		IDO1	1.06832e-76	0.822879	2.77764e-75		TNFRSF9	4.18857e-51	2.77213	5.44515e-50		TNFRSF18	3.64817e-43	2.45882	3.16175e-42
LAG3	1.64769e-24	1.18966	2.142e-23		CTLA4	1.87262e-69	0.518027	2.43441e-68		CD276	1.56494e-41	0.961331	1.01721e-40		CD276	4.3534e-37	0.755553	2.82971e-36
CTLA4	1.6803e-22	1.17886	1.45626e-21		LAG3	1.63141e-65	0.638523	1.41389e-64		TNFRSF18	4.34374e-32	2.23796	1.88229e-31		TNFRSF9	2.43443e-25	1.73193	1.2659e-24
TLR9	3.12263e-21	0.786634	2.02971e-20		TNFRSF4	1.64801e-39	0.368071	1.0712e-38		LAG3	2.062e-27	1.94724	7.65885e-27		TNFRSF4	3.04363e-15	0.990812	7.19404e-15
VEGFA	1.93506e-20	0.56733	1.00623e-19		VEGFA	3.06186e-39	0.434816	1.59217e-38		TNFRSF4	3.35331e-23	1.42323	1.08983e-22		PDCD1	3.48576e-08	0.944036	6.04199e-08
TNFRSF9	1.61675e-19	1.04019	7.0059e-19		TNFRSF9	1.90062e-38	0.190824	8.23601e-38		CTLA4	2.90024e-19	1.57794	8.37846e-19		LAG3	1.52128e-06	0.757583	2.47208e-06
CD47	3.66241e-12	0.348332	1.19028e-11		PDCD1	3.70567e-37	0.227621	1.37639e-36		PDCD1	6.12727e-19	1.67435	1.59309e-18		VEGFA	0.000191135	0.293986	0.000292324
CSF2	2.22437e-11	0.363672	6.42597e-11		CD40	5.9591e-32	0.279353	1.93671e-31		VEGFA	4.06935e-17	0.861316	9.61847e-17		IL21	0.00452598	0.160133	0.00588378
KIR3DL1	1.30495e-09	0.4196	3.08443e-09		TLR9	1.75915e-29	0.144072	5.08198e-29		IDO1	2.3037e-13	1.77778	4.99135e-13		CTLA4	0.0194227	0.39908	0.0229541
PDCD1	2.46303e-09	0.73031	5.33657e-09		IL15	4.62001e-26	0.234592	1.2012e-25		IL21	9.81392e-07	0.357988	1.82259e-06		CD27	0.20226	0.225435	0.219115
CCL2	5.34383e-09	0.535234	1.06877e-08		CD27	4.84299e-25	0.395112	1.14471e-24		CD27	7.19537e-06	0.813241	1.10047e-05		IDO1	0.622114	0.103874	0.622114
CD40	4.54694e-07	0.352782	7.88136e-07		CCL2	1.692e-23	0.529743	3.66599e-23		TLR9	0.00119335	0.370356	0.00163301		CD200	1.38203e-53	-1.47855	3.59329e-52
CD276	4.47926e-07	0.205778	8.31863e-07		CD274	1.25018e-16	0.068289	2.50035e-16		CSF2	0.0119964	0.261101	0.0148527		TEK	3.0673e-50	-1.78205	3.98749e-49
TNFRSF4	7.16913e-07	0.432422	1.16498e-06		KIR3DL1	2.55206e-13	0.070327	4.1471e-13		CD274	0.550083	0.0866962	0.550083		TLR3	9.22793e-23	-1.19913	3.99877e-22
CD274	1.48148e-06	0.44515	2.26579e-06		CSF2	9.77346e-12	0.0512685	1.41172e-11		TEK	1.61175e-59	-2.35601	4.19055e-58		KLRC1	1.76049e-18	-1.32378	6.53897e-18
CD27	2.05601e-06	0.587806	2.96979e-06		KLRC1	9.63755e-12	0.075237	1.47398e-11		CD200	3.43898e-45	-1.49225	2.98045e-44		CD40	2.77356e-18	-0.855503	9.01406e-18
KLRC1	3.54609e-06	0.49524	4.85254e-06		CD276	8.07287e-11	0.169833	1.10471e-10		TLR3	5.55157e-38	-1.75657	2.88682e-37		CCL2	5.40193e-16	-1.15419	1.56056e-15
IL15	4.84612e-06	0.360805	6.29996e-06		CD47	1.56822e-09	0.165262	2.03869e-09		CD40	1.00557e-06	-0.502721	1.74299e-06		CD47	9.02464e-16	-0.56851	2.34641e-15
IL21	7.83963e-06	0.197854	9.7062e-06		CD200	0.129861	0.0176157	0.146799		CSF1R	9.37764e-07	-0.539995	1.87553e-06		KIR3DL1	2.03153e-11	-0.637154	4.40164e-11
CSF1R	0.517124	0.0462926	0.560218		IL21	0.169121	0.00884155	0.183215		KLRC1	4.45665e-06	-0.828535	7.24205e-06		CSF1R	2.19598e-08	-0.586288	4.39196e-08
IL2	0.578061	0.0273106	0.601184		CSF1R	0.231501	0.0425482	0.240761		CCL2	1.81783e-05	-0.618955	2.62576e-05		IL15	2.69455e-08	-0.598653	5.00417e-08
TEK	3.66091e-13	-0.573959	1.35977e-12		TEK	8.85228e-16	-0.201188	1.64399e-15		CD47	0.00339229	-0.220178	0.00440998		TLR9	0.000287926	-0.416278	0.000415893
TLR3	8.15587e-11	-0.557444	2.12053e-10		TLR3	9.5121e-14	-0.104554	1.64876e-13		IL2	0.0304841	-0.175549	0.0360267		CD274	0.00381777	-0.358454	0.00522432
TNFRSF18	0.0618632	-0.220853	0.073111		TNFRSF18	3.25064e-06	-0.125724	4.0246e-06		IL15	0.0529199	-0.237849	0.0598225		IL2	0.00700222	-0.20286	0.00866941
TLR7	0.48419	-0.0586886	0.547345		IL2	0.0628736	-0.0112711	0.0743052		KIR3DL1	0.075828	-0.217555	0.082147		CSF2	0.141885	-0.102571	0.160392
CD200	0.830099	-0.0136915	0.830099		TLR7	0.73616	-0.0105206	0.73616		TLR7	0.323035	-0.129067	0.335957		TLR7	0.55052	-0.0703785	0.572541
Genes targeted in preclinical development
Gene symbol	P-value	Log2(fold change)	FDR		Gene symbol	P-value	Log2(fold change)	FDR		Gene symbol	P-value	Log2(fold change)	FDR		Gene symbol	P-value	Log2(fold change)	FDR
SIRPA	7.14559e-18	0.539625	8.57471e-17		SIRPA	1.94929e-31	0.355873	1.16958e-30		TIGIT	3.61159e-31	2.16014	2.16695e-30		TIGIT	3.59172e-09	1.11906	1.07752e-08
TIGIT	1.77538e-15	1.04108	1.06523e-14		TIGIT	8.18335e-27	0.11868	2.455e-26		HAVCR2	2.09264e-10	0.66664	5.02235e-10		DKFZp686O24166	8.7159e-07	0.702225	2.09182e-06
CD96	2.0977e-07	0.645587	8.3908e-07		BTLA	1.59963e-22	0.174616	3.19926e-22		HHLA2	0.0043071	0.267375	0.0073836		HAVCR2	9.68139e-05	0.363469	0.000193628
HHLA2	8.54199e-07	0.253585	2.5626e-06		ADK	4.38097e-18	0.202261	6.57146e-18		ADK	0.0639344	0.13021	0.0959016		HHLA2	0.837809	0.0137894	0.837809
HAVCR2	1.80487e-06	0.303171	4.33169e-06		NT5E	1.21438e-12	0.155815	1.45725e-12		DKFZp686O24166	0.083811	0.299935	0.111748		SIRPA	3.15006e-69	-1.58465	3.78007e-68
BTLA	2.98493e-06	0.579622	5.96986e-06		VTCN1	0.00655969	0.259776	0.00655969		BTLA	0.214335	0.225482	0.257202		C10orf54	3.83712e-65	-1.84578	2.30227e-64
ADK	2.10703e-05	0.169678	3.61205e-05							C10orf54	1.39158e-58	-1.72828	1.6699e-57		NT5E	7.00484e-37	-1.46551	2.80193e-36
NT5E	0.000143274	0.294484	0.000191032							SIRPA	8.46069e-25	-1.04502	3.38428e-24		CD96	0.000200256	-0.647581	0.000343297
VTCN1	0.0204085	0.446029	0.0222638							NT5E	1.17583e-18	-1.17103	3.52749e-18		VTCN1	0.0133171	-0.744919	0.0199757
C10orf54	0.0810172	0.117501	0.0810172							TMEM173	1.05041e-05	-0.36452	2.10083e-05		TMEM173	0.0329117	-0.155866	0.0438822
TMEM173	8.55942e-05	-0.208654	0.000128391							VTCN1	0.311539	-0.29889	0.339861		BTLA	0.0394401	-0.35414	0.0473281
DKFZp686O24166	0.000183682	-0.40229	0.000220418							CD96	0.990719	-0.00199401	0.990719		ADK	0.416145	-0.0394684	0.453977
Note:
1. Red color indicates that the gene or gene-set has significantly higher expression or enrichment levels in TP53-mutated BCs than in TP53-wildtype BCs or normal tissue, and purple color indicates that the gene or gene-set has significantly lower expression or enrichment levels in TP53-mutated BCs than in TP53-wildtype BCs or normal tissue. It applies to all the supplementary tables.
2. In comparisons of TP53-wildtype BCs vs. normal tissue, red color indicates that the gene or gene-set has significantly higher expression or enrichment levels in TP53-wildtype BCs than in normal tissue, and purple color indicates that the gene or gene-set has significantly lower expression or enrichment levels in TP53-wildtype BCs than in normal tissue. It applies to all the supplementary table…
